# Supplementary material for: Integrating Ecosystem Services into Risk Assessments for Drinking Water Protection
Source: MDPI journal article supplement (doi:10.3390/w14081180), 2022-04-07
Supplement: s1 [file s1]

Archive with 6 entries (6 files):
- Table S4.xlsx
- Table S5.xlsx
- Table S6.xlsx
- Table S3.xlsx
- Table S1.pdf
- Table S2.xlsx
