# Supplementary material for: Integrating Ecosystem Services into Risk Assessments for Drinking Water Protection
Source: MDPI journal article supplement (doi:10.3390/w14081180), 2022-04-07
Supplement: s1 [file s1 › Table S1.pdf]

## Supplementary Material – S1

The term *water services* is used in water protection, flood assessment, sanitation, and the provision of drinking water. However, this term is most often associated with the delivery of water from water utilities which makes it unsuited for our delimitation. The term *water ecosystem services* describes a subcategory of ecosystem services where the water resource and its biotic elements are assessed but this study aims at including both biotic and abiotic components. Therefore, the most fitting term was found to be *water system services*. The representation of the terminology and their respective uses in different fields are described in more detail in Table S1.

**Table S1.** Overview of terminology options in different databases and the dominant use of those options in different disciplines.

| Terminology                          | Uses of the terminology and limitations                                                                                                                                         |
|--------------------------------------|---------------------------------------------------------------------------------------------------------------------------------------------------------------------------------|
| <i>Water services</i>                | The provision and delivery of drinking water<br>The protection of water sources<br>The protection from excess water (flooding) and safe drainage<br>The provision of sanitation |
| <i>Water system services</i>         | Providing water in sufficient quantity and quality for multiple uses                                                                                                            |
| <i>Water ecosystem services</i>      | A subcategory of ecosystem services where the water resource is assessed                                                                                                        |
| <i>Hydrologic ecosystem services</i> | A subcategory of ecosystem services for surface water sources<br>Excludes hydrogeology                                                                                          |
| <i>Water resource services</i>       | No substantial use of the terminology                                                                                                                                           |
| <i>Water sources services</i>        | No substantial use of the terminology                                                                                                                                           |
| <i>Water body services</i>           | No substantial use of the terminology                                                                                                                                           |
