# Supplementary material for: Integrating Ecosystem Services into Risk Assessments for Drinking Water Protection
Source: MDPI journal article supplement (doi:10.3390/w14081180), 2022-04-07
Supplement: s1 [file s1 › Table S2.xlsx]

## Sheet: LitRev_additional services
Authors	Author(s) ID	Title	Is the paper relevant for the scope of WSS in Sweden? If yes, include; otherwise exclude	Additional services found that are relevant for the WSS-list?	Year	Source title	Volume	Issue	Art. No.	Page start	Page end	Page count	Cited by	DOI	Link	Affiliations	Authors with affiliations	Abstract	Author Keywords	Index Keywords	Molecular Sequence Numbers	Chemicals/CAS	Tradenames	Manufacturers	Funding Details	Funding Text 1	Funding Text 2	Funding Text 3	Funding Text 4	Funding Text 5	Funding Text 6	References	Correspondence Address	Editors	Sponsors	Publisher	Conference name	Conference date	Conference location	Conference code	ISSN	ISBN	CODEN	PubMed ID	Language of Original Document	Abbreviated Source Title	Document Type	Publication Stage	Open Access
Ye Y.-P., Wang R.-S., Ren J.-M., Hu D., Yuan S.-J., Wang M.	57214395833;7405335026;7403083589;7402585241;56225186800;57221236817;	Ecological service assessment of human-dominated freshwater ecosystem with a case study in Yangzhou Prefecture, China	Include	no	2004	Journal of Environmental Sciences	16	5		755	761		4		https://www.scopus.com/inward/record.uri?eid=2-s2.0-4444288961&partnerID=40&md5=0c7e6cf9a989c769b8e04781232ec8e9	Res. Ctr. for Eco-Environmental Sci., Chinese Academy of Sciences, Beijing 100085, China	Ye, Y.-P., Res. Ctr. for Eco-Environmental Sci., Chinese Academy of Sciences, Beijing 100085, China; Wang, R.-S., Res. Ctr. for Eco-Environmental Sci., Chinese Academy of Sciences, Beijing 100085, China; Ren, J.-M., Res. Ctr. for Eco-Environmental Sci., Chinese Academy of Sciences, Beijing 100085, China; Hu, D., Res. Ctr. for Eco-Environmental Sci., Chinese Academy of Sciences, Beijing 100085, Ch…	Freshwater ecosystems provide a host of services to humanity. These services are now rapidly being lost, not least because of the inability of making the impacts measurable. To overcome this obstacle, assessment frameworks for freshwater ecosystem services are needed. A simple water equivalent framework to assess the ecological services provided by freshwater ecosystems was developed in this stud…	Assessment; Freshwater ecosystems; Human impacts; Services; Water equivalent; Yangzhou Perfecture	Ecosystems; Environmental impact; Potable water; Throughput; Freshwater; Water management; Ecology; fresh water; ecosystem service; environmental assessment; environmental impact; freshwater ecosystem; water management; article; China; ecosystem; environment; environmental monitoring; environmental protection; food industry; human activities; socioeconomics; China; Conservation of Natural Resourc…												Biswas, A.K., Sustainable water development: A global perspective (1992) Water International, 17, pp. 68-79; Brouwer, R., Langfore, I.H., Bateman, I.J., A meta-analysis of wetland contingent valuation studies (1999) Regional Environmental Change, 1 (1), pp. 47-57; Chen, Z., Zhang, X., Valuation of China's ecosystem benefits (2000) Scientific Bulletin, 45 (1), pp. 17-22; Colby, B.G., Estimating th…	Ye, Y.-P.; Res. Ctr. for Eco-Environmental Sci., , Beijing 100085, China; email: yapingye@hotmail.com								10010742			15559806	English	J. Environ. Sci.	Article	Final
Enderlein R., Bernardini F.	7006809859;36757451300;	Nature for water: Ecosystem services and water management	Include	no	2005	Natural Resources Forum	29	3		253	255		3	10.1111/j.1477-8947.2005.00135.x	https://www.scopus.com/inward/record.uri?eid=2-s2.0-28244434360&doi=10.1111%2fj.1477-8947.2005.00135.x&partnerID=40&md5=c1e04df0d484adb23e7e9399b8aca121	United Nations Economic Commission for Europe, Geneva, Switzerland	Enderlein, R., United Nations Economic Commission for Europe, Geneva, Switzerland; Bernardini, F., United Nations Economic Commission for Europe, Geneva, Switzerland	[No abstract available]		ecosystem management; water management												http://www.unece.org/env/water/meetings/ecosystem/seminar.htm	Enderlein, R.; United Nations Economic Commission for Europe, Geneva, Switzerland			Blackwell Publishing Ltd					1650203				English	Nat. Resour. Forum	Review	Final
Egoh B., Reyers B., Rouget M., Richardson D.M., Le Maitre D.C., van Jaarsveld A.S.	6504663884;6603004274;6701328477;7403444596;6701679632;35555851900;	Mapping ecosystem services for planning and management	Include	no	2008	Agriculture, Ecosystems and Environment	127	2021-02-01		135	140		410	10.1016/j.agee.2008.03.013	https://www.scopus.com/inward/record.uri?eid=2-s2.0-44549085267&doi=10.1016%2fj.agee.2008.03.013&partnerID=40&md5=d8024f97750708bac880917f1f35e82f	Centre for Invasion Biology, Department of Botany and Zoology, Stellenbosch University, Private Bag X1, Matieland, 7602, South Africa; Natural Resources and the Environment, Council for Scientific and Industrial Research, PO Box 320, Stellenbosch, 7599, South Africa; South African National Biodiversity Institute, Private Bag X101, Pretoria, 0001, South Africa	Egoh, B., Centre for Invasion Biology, Department of Botany and Zoology, Stellenbosch University, Private Bag X1, Matieland, 7602, South Africa, Natural Resources and the Environment, Council for Scientific and Industrial Research, PO Box 320, Stellenbosch, 7599, South Africa, South African National Biodiversity Institute, Private Bag X101, Pretoria, 0001, South Africa; Reyers, B., Natural Resour…	This study mapped the production of five ecosystem services in South Africa: surface water supply, water flow regulation, soil accumulation, soil retention, and carbon storage. The relationship and spatial congruence between services were assessed. The congruence between primary production and these five services was tested to evaluate its value as a surrogate or proxy ecosystem service measure. …	Carbon; Conservation biogeography; Conservation planning; Primary productivity; Soil; Water	carbon sequestration; conservation planning; ecosystem management; ecosystem service; heterogeneity; mapping method; primary production; surface water; water flow; water supply; Africa; South Africa; Southern Africa; Sub-Saharan Africa					National Research Foundation; DST-NRF Centre of Excellence for Invasion Biology; International Foundation for Science; Bangladesh Council of Scientific and Industrial Research; Centre of Renewable and Sustainable Energy Studies, Stellenbosch University	This work was supported by the International Foundation for Science (Stockholm, Sweden) through a grant to BE, the National Research Foundation (NRF) through the DST-NRF Centre of Excellence for Invasion Biology (CIB) at Stellenbosch University, the South African National Biodiversity Institute (SANBI), Council for Scientific and Industrial Research (CSIR), and Stellenbosch University. Some of th…						Allanson, B.R., Hart, R.C., O'Keeffe, J.H., Robarts, R.D., (1990) Inland Waters of Southern Africa: An Ecological Perspective, , Kluwer Academic Publishers, Dordrecht, The Netherlands; Balmford, A., Conservation planning in the real world: South Africa shows the way (2003) Trends Ecol. Evol., 18, pp. 435-438; Biggs, R., Bohensky, E., Desanker, P.V., Fabricius, C., Lymann, T., Misselhorn Musvoto, …	Egoh, B.; Centre for Invasion Biology, Private Bag X1, Matieland, 7602, South Africa; email: benis@sun.ac.za								1678809		AEEND		English	Agric. Ecosyst. Environ.	Article	Final	All Open Access, Green
van Wilgen B.W., Reyers B., Le Maitre D.C., Richardson D.M., Schonegevel L.	7004047546;6603004274;6701679632;7403444596;16231278900;	A biome-scale assessment of the impact of invasive alien plants on ecosystem services in South Africa	Exclude	-	2008	Journal of Environmental Management	89	4		336	349		163	10.1016/j.jenvman.2007.06.015	https://www.scopus.com/inward/record.uri?eid=2-s2.0-50949120256&doi=10.1016%2fj.jenvman.2007.06.015&partnerID=40&md5=1940459992599d9ad59f9b7c6867dee3	Centre for Invasion Biology, CSIR Natural Resources and the Environment, P.O. Box 320, Stellenbosch, 7599, South Africa; Department of Botany and Zoology, Centre for Invasion Biology, University of Stellenbosch, Private Bag X1, Matieland, 7602, South Africa	van Wilgen, B.W., Centre for Invasion Biology, CSIR Natural Resources and the Environment, P.O. Box 320, Stellenbosch, 7599, South Africa; Reyers, B., Centre for Invasion Biology, CSIR Natural Resources and the Environment, P.O. Box 320, Stellenbosch, 7599, South Africa; Le Maitre, D.C., Centre for Invasion Biology, CSIR Natural Resources and the Environment, P.O. Box 320, Stellenbosch, 7599, Sou…	This paper reports an assessment of the current and potential impacts of invasive alien plants on selected ecosystem services in South Africa. We used data on the current and potential future distribution of 56 invasive alien plant species to estimate their impact on four services (surface water runoff, groundwater recharge, livestock production and biodiversity) in five terrestrial biomes. The e…	Biodiversity; Fynbos; Grassland; Grazing; Groundwater; Hydrology; Karoo; Savanna; Water yield	ground water; runoff; surface water; biodiversity; biome; ecological impact; ecosystem service; environmental impact assessment; estimation method; fynbos; grazing pressure; invasive species; plant; savanna; water yield; article; biodiversity; biome; ecosystem resilience; environmental health; environmental impact; environmental management; grassland; grazing; hydrology; livestock; nonhuman; pred…					Council for Scientific and Industrial Research, South Africa, CSIR; Department of Science and Technology, Ministry of Science and Technology, India, डीएसटी; National Research Foundation of Korea, NRF	Funding for this study was provided by the South African CSIR and the DST/NRF Centre for Invasion Biology. The SAPIA database was developed and maintained by the Plant Protection Research Institute of the South African Agricultural Research Council. We thank Lesley Henderson for her leadership in this regard, and the South African Working for Water programme for funding the ongoing maintenance of…						Anonymous, 2004. Working for water. Annual Report 2003/04, Department of Water Affairs and Forestry, Pretoria; Baruch, Z., Jackson, R.B., Responses of tropical native and invader C4 grasses to water stress, clipping and increased atmospheric CO2 concentration (2005) Oecologia, 145, pp. 522-532; Biggs, R., Bohensky, E., Desanker, P.V., Fabricius, C., Lynam, T., Misselhorn, A.A., Musvoto, C., van J…	van Wilgen, B.W.; Centre for Invasion Biology, P.O. Box 320, Stellenbosch, 7599, South Africa; email: bvwilgen@csir.co.za								3014797		JEVMA	17765388	English	J. Environ. Manage.	Article	Final	All Open Access, Green
Boulton A.J., Fenwick G.D., Hancock P.J., Harvey M.S.	35267971600;7006883409;9132655300;7202676319;	Biodiversity, functional roles and ecosystem services of groundwater invertebrates	Include	no	2008	Invertebrate Systematics	22	2		103	116		140	10.1071/IS07024	https://www.scopus.com/inward/record.uri?eid=2-s2.0-43549085303&doi=10.1071%2fIS07024&partnerID=40&md5=03b4c4e22a3e6998a5ff2ae9b764878c	Ecosystem Management, University of New England, Armidale, NSW 2350, Australia; National Institute of Water and Atmospheric Research, PO Box 8602, Riccarton, Christchurch, New Zealand; Department of Terrestrial Invertebrates, Western Australian Museum, Locked Bag 49, Welshpool DC, WA 6986, Australia	Boulton, A.J., Ecosystem Management, University of New England, Armidale, NSW 2350, Australia; Fenwick, G.D., National Institute of Water and Atmospheric Research, PO Box 8602, Riccarton, Christchurch, New Zealand; Hancock, P.J., Ecosystem Management, University of New England, Armidale, NSW 2350, Australia; Harvey, M.S., Department of Terrestrial Invertebrates, Western Australian Museum, Locked …	Recent surveys of groundwater invertebrates (stygofauna) worldwide are yielding rich troves of biodiversity, with significant implications for invertebrate systematists and phylogeneticists as well as ecologists and groundwater managers. What is the ecological significance of this high biodiversity of invertebrates in some aquifers? How might it influence groundwater ecosystem services such as wa…	Aquifers; Biodiversity; Ecosystem goods and services; Functional structure; Groundwater management; Stygofauna	abundance; biodiversity; bioremediation; community structure; ecosystem function; ecosystem service; groundwater; invertebrate; keystone species; phylogenetics; population decline; taxonomy; terrestrial ecosystem; Australasia; Australia; New Zealand; Invertebrata												Balvanera, P., Kremen, C., Martinez-Ramos, M., Applying community structure analysis to ecosystem function: Examples from pollination and carbon storage (2005) Ecological Applications, 15, pp. 360-375. , doi:10.1890/03-5192; Bärlocher, F., Murdoch, L.H., Hyporheic biofilms - a potential food source for interstitial animals (1989) Hydrobiologia, 184, pp. 61-67; Bergkamp, G., and Cross, K. (2006). …	Boulton, A. J.; Ecosystem Management, , Armidale, NSW 2350, Australia; email: aboulton@une.edu.au								14455226		ISNYA		English	Invertebr. Syst.	Review	Final	All Open Access, Bronze
Egoh B., Reyers B., Rouget M., Bode M., Richardson D.M.	6504663884;6603004274;6701328477;35304736900;7403444596;	Spatial congruence between biodiversity and ecosystem services in South Africa	Include	no	2009	Biological Conservation	142	3		553	562		215	10.1016/j.biocon.2008.11.009	https://www.scopus.com/inward/record.uri?eid=2-s2.0-58749106763&doi=10.1016%2fj.biocon.2008.11.009&partnerID=40&md5=886d1cbb2ac000fb91eccd0f4e981a94	Centre for Invasion Biology, Department of Botany and Zoology, Stellenbosch University, Private Bag X1, Matieland, 7602, South Africa; Natural Resources and the Environment, Council for Scientific and Industrial Research, P.O. Box 320, Stellenbosch, 7599, South Africa; South African National Biodiversity Institute, Private Bag x101, Pretoria, 0001, South Africa; Applied Environmental Decision Ana…	Egoh, B., Centre for Invasion Biology, Department of Botany and Zoology, Stellenbosch University, Private Bag X1, Matieland, 7602, South Africa; Reyers, B., Natural Resources and the Environment, Council for Scientific and Industrial Research, P.O. Box 320, Stellenbosch, 7599, South Africa; Rouget, M., South African National Biodiversity Institute, Private Bag x101, Pretoria, 0001, South Africa; …	Ecosystems services sustain humans all over the world. The unsustainable use of ecosystem services around the world has led to widespread degradation which now threatens human health and livelihoods. Although the maintenance of ecosystem services is often used to justify biodiversity conservation actions, it is still unclear how ecosystem services relate to different aspects of biodiversity and t…	Carbon; Conservation planning; Hotspot; Soil; Species; Water	biodiversity; biome; carbon sequestration; conservation planning; correlation; economic impact; ecosystem management; ecosystem service; environmental impact; environmental protection; health risk; soil property; spatial analysis; species richness; vegetation dynamics; water flow; Africa; South Africa; Southern Africa; Sub-Saharan Africa; Animalia					Hans-Sigrist-Stiftung; DST-NRF Centre of Excellence for Invasion Biology, CIB; Bangladesh Council of Scientific and Industrial Research, BCSIR	This work was supported by the International Foundation for Science, Stockholm, Sweden through a Grant to BE, National Research Foundation (NRF) through the DST-NRF Centre of Excellence for Invasion Biology (CIB) at the University of Stellenbosch, the South African National Biodiversity Institute (SANBI), Council for Scientific and Industrial Research (CSIR), the Hans Sigrist Foundation and the U…						Balmford, A., Moore, J.L., Brooks, T., Burgess, N., Hansen, L.A., Williams, P., Rahbek, C., Conservation conflicts across Africa (2001) Science, 291, pp. 2616-2619; Balvanera, P., Daily, G.C., Ehrlich, P.R., Ricketts, T.H., Bailey, S.A., Kark, S., Kremen, C., Pereira, H., Conserving biodiversity and ecosystem services (2001) Science, 291, p. 2047; Bookbinder, M.P., Dinerstein, E., Rijal, A., Caul…	Egoh, B.; Centre for Invasion Biology, Private Bag X1, Matieland, 7602, South Africa; email: benis@sun.ac.za								63207		BICOB		English	Biol. Conserv.	Article	Final	All Open Access, Green
Brauman K.A., Freyberg D.L., Daily G.C.	23059768400;6604056241;7004469735;	Forest structure influences on rainfall partitioning and cloud interception: A comparison of native forest sites in Kona, Hawai'i	Exclude	-	2010	Agricultural and Forest Meteorology	150	2		265	275		65	10.1016/j.agrformet.2009.11.011	https://www.scopus.com/inward/record.uri?eid=2-s2.0-74849118450&doi=10.1016%2fj.agrformet.2009.11.011&partnerID=40&md5=fa169192f12b6c242e455f984cdb3d90	Emmett Interdisciplinary Program in Environment and Resources, Stanford University, 473 Via Ortega, Stanford, CA 94305, United States; Department of Civil and Environmental Engineering, Stanford University, 473 Via Ortega, Stanford, CA 94305, United States; Department of Biology, Woods Institute for the Environment, Stanford University, 371 Serra Mall, Stanford, CA 94305, United States	Brauman, K.A., Emmett Interdisciplinary Program in Environment and Resources, Stanford University, 473 Via Ortega, Stanford, CA 94305, United States; Freyberg, D.L., Department of Civil and Environmental Engineering, Stanford University, 473 Via Ortega, Stanford, CA 94305, United States; Daily, G.C., Department of Biology, Woods Institute for the Environment, Stanford University, 371 Serra Mall, …	Vegetation can play a major role in the hydrologic ecosystem service tradeoffs resulting from land use change: by affecting the volume of rain water that reaches the ground surface, vegetation affects water supply. But because canopy interception of rainfall is affected in complex and competing ways by forest structure and ambient weather conditions, both of which vary at small and large scales, …	Canopy interception; Ecohydrology; Fog drip; Hawaii; Rainfall partitioning; Tropical montane cloud forest	canopy exchange; cloud cover; cloud forest; comparative study; data acquisition; ecohydrology; forest dynamics; forest ecosystem; hydrological response; interception; land use change; micrometeorology; rainfall; throughfall; Hawaii [(ISL) Hawaiian Islands]; Hawaii [United States]; Hawaiian Islands; Kona; United States; Bos					National Science Foundation, NSF; Koret Foundation; Moore Family Foundation, MFF	This project would not have been possible without the support and friendship of J, D, K, and J Fergerstrom; J, E, and M Greenwell; and the staff of the Kamehameha Schools Land Assets Office in Kona. Kamehameha Schools, Kealakekua Ranch, and Palani Ranch graciously allowed us to erect weather stations on their property. Jody Fergerstrom provided invaluable field assistance. The authors are most gr…						Bean, C., Juvik, J.O., Nullet, D., Mountain evaporation profiles on the island of Hawaii (1994) Journal of Hydrology, 156 (1-4), pp. 181-192; Berger, T.W., Untersteiner, H., Schume, H., Jost, G., Throughfall fluxes in a secondary spruce (Picea abies), a beech (Fagus sylvatica) and a mixed spruce-beech stand (2008) Forest Ecology and Management, 255 (3-4), pp. 605-618; Brauman, K.A., Daily, G.C., …	Brauman, K.A.; Emmett Interdisciplinary Program in Environment and Resources, 473 Via Ortega, Stanford, CA 94305, United States; email: kbrauman@stanford.edu								1681923		AFMEE		English	Agric. For. Meterol.	Article	Final
Nislow K.H., Marks C.O., Lutz K.A.	6603044602;13002553200;12795001300;	Aquatic conservation planning at a landscape scale	Exclude	-	2010	Landscape-scale Conservation Planning				99	119		4	10.1007/978-90-481-9575-6_6	https://www.scopus.com/inward/record.uri?eid=2-s2.0-84892782550&doi=10.1007%2f978-90-481-9575-6_6&partnerID=40&md5=26ce71c14a6101d5259ec7fb4e41260e	Research Fisheries Biologist and Team Leader, USDA Forest Service-Northern Research Station, MA 01003, United States; Nature Conservancy, 25 Main Street, Northampton, MA 01060, United States; Connecticut River Program, Nature Conservancy, 25 Main Street, Northampton, MA 01060, United States	Nislow, K.H., Research Fisheries Biologist and Team Leader, USDA Forest Service-Northern Research Station, MA 01003, United States; Marks, C.O., Nature Conservancy, 25 Main Street, Northampton, MA 01060, United States; Lutz, K.A., Connecticut River Program, Nature Conservancy, 25 Main Street, Northampton, MA 01060, United States	Inland surface waters provide vital ecosystem services and support a diverse and important biota. An overriding feature of freshwater ecosystems is-connectedness, which has been compromised by a wide range of human actions. Strong connections between terrestrial watersheds and receiving waters, and upstream and downstream linkages within river systems, make a large-scale-perspective essential in …	Anadromous fish; Aquatic conservation; Connecticut River; Floodplain forests; Freshwater ecosystems													Allan, J.D., Castillo, M.M., (2007) Stream Ecology: Structure and Function of Running Waters (2nd Ed.), , Berlin: Springer; Beechie, T., Bolton, S., An approach to restoring salmonid habitat-forming process in Pacific Northwest watersheds (1999) Fisheries, 24, pp. 6-15; Beechie, T., Beamer, E., Collins, B., Benda, L., Restoration of habitat-forming processes in Pacific Northwest watersheds: A loc…	Nislow, K.H.; Research Fisheries Biologist and Team Leader, , MA 01003, United States; email: knislow@fs.fed.us			Springer Netherlands						9789048195749			English	Landsc.-Scale Conserv. Plann.	Book Chapter	Final
Zi T.	55533147200;	Assessment on water ecosystem services in the Songhua River basin by AHP method	Include	no	2010	2010 4th International Conference on Bioinformatics and Biomedical Engineering, iCBBE 2010			5514915				2	10.1109/ICBBE.2010.5514915	https://www.scopus.com/inward/record.uri?eid=2-s2.0-77956133887&doi=10.1109%2fICBBE.2010.5514915&partnerID=40&md5=3040a9140e9a69ff4535bdc44094d95e	School of Tourism and Cuisine, Harbin University of Commerce, Harbin, China; School of Environment, Beijing Normal University, Beijing 100875, China	Zi, T., School of Tourism and Cuisine, Harbin University of Commerce, Harbin, China, School of Environment, Beijing Normal University, Beijing 100875, China	The purpose of this paper is to establish an evaluation system to estimate the water ecosystem services in the Songhua River Basin. According to the MA's classification, this paper groups water ecosystem services into four categories comprised of provisioning, regulating, cultural and supporting. On the basis, the paper assesses the sixteen important significant indexes for the Songhua River Basi…	Analytic hierarchy process; The songhua river basin; Water ecosystem services	AHP method; Aquatic products; Evaluation system; Flood mitigation; Nutrient cycling; Paper groups; River transportation; Soil formations; Songhua River; Water ecosystem services; Water ecosystems; Water purification; Water storage; Analytic hierarchy process; Biodiversity; Bioinformatics; Climatology; Hierarchical systems; Hydrogeology; Rivers; Soils; Water supply; Watersheds; Ecosystems												Barkmanna, J., Glenka, K., Keila, A., Confronting unfamiliarity with ecosystem functions: The case for an ecosystem service approach to environmental valuation with stated preference methods (2008) Ecological Economics, 65, pp. 48-62; Costanza, R., D'Arge, R., De Groot, R., The value of the world's ecosystem services and natural capital (1997) Nature, 387, pp. 253-260; Daily, G.C., (1997) Nature'…	Zi, T.; School of Tourism and Cuisine, , Harbin, China; email: tz09@163.com		IEEE Engineering in Medicine and Biology Society;Sichuan University;Wuhan University		4th International Conference on Bioinformatics and Biomedical Engineering, iCBBE 2010	18 June 2010 through 20 June 2010	Chengdu	81521		9781424447138			English	Int. Conf. Bioinformatics Biomed. Eng., iCBBE	Conference Paper	Final
Fang J., Xiang W., Liu S.	7402966333;14017132400;37077344200;	Canopy interception and throughfall in a primary Picea likiangensis var. linzhiensis forest of Tibet	Exclude	-	2010	Shengtai Xuebao/ Acta Ecologica Sinica	30	14		3679	3687		1		https://www.scopus.com/inward/record.uri?eid=2-s2.0-79952729283&partnerID=40&md5=1743fd8818fc78e2dfc3b113fd0049d7	Faculty of Life Science and Technology, Central South Forestry University, Changsha 410004, China; Institute of Plateau Ecology, Tibet Agricultural and Animal Husbandry College, Linzhi 860000, Austria; Department of Development Planning and Assets Management, China State Forestry Administration, Beijing 100714, China	Fang, J., Faculty of Life Science and Technology, Central South Forestry University, Changsha 410004, China, Institute of Plateau Ecology, Tibet Agricultural and Animal Husbandry College, Linzhi 860000, Austria; Xiang, W., Faculty of Life Science and Technology, Central South Forestry University, Changsha 410004, China; Liu, S., Faculty of Life Science and Technology, Central South Forestry Unive…	Rainfall partitioning in forest canopy plays an important role in hydrological cycles. Because the process that rainfall is partitioned by canopy into interception, throughfall and stemflow affects the volume and routine of rainfall that reaches the ground surface, the surface runoff causing soil erosion, and soil water supply for plant growth are altered. Although extensive researches have been …	Canopy interception; Picea likiangensis var. linzhiensis; Precipitation; Primary forest; Stemflow; Throughfall; Tibet plateau	coniferous forest; ecosystem service; forest canopy; forest ecosystem; growing season; hydrological cycle; interception; rainfall; runoff; soil erosion; stemflow; throughfall; China; Qinghai-Xizang Plateau; Picea; Picea likiangensis var. linzhiensis												Iioren, P., Domingo, F., Rainfall partitioning by vegetation under Mediterranean conditions: A review of studies in Europe (2005) Journal of Hydrology, 335, pp. 37-54; Pan, W.C., Tian, D.L., Chen, X.Y., Wen, S.Z., Hydrological processes and nutrient dynamics in subtropical Chinese fir plantations ecosystems (1989) Journal of Central South Forestry College, (SUP), pp. 1-9; Gao, J.R., Xiao, B., Zha…	Xiang, W.; Faculty of Life Science and Technology, , Changsha 410004, China; email: xiangwh2005@163.com								10000933				Chinese	Shengtai Xuebao Acta Ecol. Sin.	Article	Final
Li B., Sun T.-S., Song X.-Y., Hou Y.	36071197200;55909355100;34882158400;55540675100;	Dynamic assessment of ecosystem service value in Huangfuchuan basin based on LUCC	Include	no	2010	Proceedings - 2010 3rd International Conference on Biomedical Engineering and Informatics, BMEI 2010	6		5639691	2399	2404		1	10.1109/BMEI.2010.5639691	https://www.scopus.com/inward/record.uri?eid=2-s2.0-78650658427&doi=10.1109%2fBMEI.2010.5639691&partnerID=40&md5=1a4bc224ade9a983fa20e320789dc6e4	State Key Laboratory of Earth Surface Processes and Resource Ecology, College of Resource Science and Technology, Beijing Normal University, Beijing, China	Li, B., State Key Laboratory of Earth Surface Processes and Resource Ecology, College of Resource Science and Technology, Beijing Normal University, Beijing, China; Sun, T.-S., State Key Laboratory of Earth Surface Processes and Resource Ecology, College of Resource Science and Technology, Beijing Normal University, Beijing, China; Song, X.-Y., State Key Laboratory of Earth Surface Processes and …	Ecosystem services value assessment is currently the research hotspot in ecology, ecological economics etc, which can provide theoretical and decision-making basis for regional ecological environment improvement. Based on the data of LUCC (land use and cover change) from 1989 to 2000 and ecosystem services value per unit area in Loess Plateau, changes of ecosystem services value in Huangfuchuan b…	Assessment; Ecosystem services value; Huangfuchuan basin; Land use/cover	Assessment; Dynamic assessment; Ecological economics; Ecological environments; Ecosystem services; Ecosystem services value; Forest land; Hot spot; Huangfuchuan basin; Land use and cover change; Land use type; Land use/cover; Loess Plateau; Per unit; Research areas; Research results; Sensitivity coefficient; Soil erosion; Biomedical engineering; Decision making; Economics; Erosion; Information sc…												Costanza, R., D'Arge, R., Groot, R., Farber, S., Grasso, M., Hannon, B., The value of the world's ecosystem services and natural capital (1998) Nature, 386, pp. 253-259; Ayres, R.U., The price-value paradox (1998) Ecological Economics, 25, pp. 17-19; Serafy, S., Pricing the invaluable: The value of the world's ecosystem services and natural capital (1998) Ecological Economics, 25, pp. 25-27; Hans…	Li, B.; State Key Laboratory of Earth Surface Processes and Resource Ecology, , Beijing, China; email: libo@ires.cn				3rd International Conference on BioMedical Engineering and Informatics, BMEI 2010	16 October 2010 through 18 October 2010	Yantai	83103		9781424464968			English	Proc. - Int. Conf. Biomed. Eng. Inf., BMEI	Conference Paper	Final
Okruszko T., Duel H., Acreman M., Grygoruk M., Flörke M., Schneider C.	9636252900;6508326278;55405819500;36955064000;16205297300;55697254400;	Broad-scale ecosystem services of European wetlands-overview of the current situation and future perspectives under different climate and water management scenarios [Les services écosystémiques á grande échelle des zones humides européennes: Apeŗu de la situation actuelle et perspectives sous différents scénarios climatiques et de gestion de l'eau]	Include	no	2011	Hydrological Sciences Journal	56	8		1501	1517		42	10.1080/02626667.2011.631188	https://www.scopus.com/inward/record.uri?eid=2-s2.0-84858196300&doi=10.1080%2f02626667.2011.631188&partnerID=40&md5=6f95e0e1b9f56b9260eb5f0211a32398	Division of Hydrology and Water Resources, Warsaw University of Life Sciences, Poland; Deltares, Utrecht, Netherlands; Centre for Ecology and Hydrology, Crowmarsh Gifford, Wallingford, OX10 8BB, United Kingdom; Centre for Environmental Systems Research, University of Kassel, Germany	Okruszko, T., Division of Hydrology and Water Resources, Warsaw University of Life Sciences, Poland; Duel, H., Deltares, Utrecht, Netherlands; Acreman, M., Centre for Ecology and Hydrology, Crowmarsh Gifford, Wallingford, OX10 8BB, United Kingdom; Grygoruk, M., Division of Hydrology and Water Resources, Warsaw University of Life Sciences, Poland; Flörke, M., Centre for Environmental Systems Resea…	An appropriate hydrological regime within a wetland is essential to maintain its goods and services. This regime is related to the source of the water, which differs for particular kinds of wetlands. This paper presents an overview of the ecosystem services of European wetlands, based on a representative sample of 102 protected wetlands larger than 5000 ha, and the implications of hydrological al…	climate change; ecosystem services; hydrology; water management; wetlands	Belarus; Biomass productions; Carbon storage; Central Europe; Current situation; ecosystem services; Fish production; Future climate; Future perspectives; General circulation model; Germany; Ground water recharge; Groundwater dynamics; Hungary; Hydrological changes; Hydrological regime; Land-use change; Management scenarios; Model-driven; Nutrient removal; Potential change; Potential threats; Pro…					Natural Environment Research Council, NERC: CEH010022							Acreman, M.C., Ethical aspects of ecosystems (2003) Water Policy, 7 (1), pp. 11-21; Acreman, M.C., Environmental flows from dams; the Water Framework Directive Engineering Sustainability (2009) ESI, 162, pp. 13-22; Acreman, M.C., Miller, F., Practical approaches to hydrological assessment of wetlands lessons from the UK (2007) Wetlands; monitoring, modelling and management, , In: Okruszko T., Mal…	Okruszko, T.; Division of Hydrology and Water Resources, Poland; email: t.okruszko@levis.sggw.pl								2626667		HSJOD		English; French	Hydrol. Sci. J.	Article	Final
Zhang C., Yan D.-H., Hao C.-L., Qin T.-L., Wang L.-H.	55559133500;7401863116;35193875600;36537757100;35235257400;	Advances in water ecosystem service study and its key supporting technologies	Exclude	-	2011	Shuikexue Jinzhan/Advances in Water Science	22	1		126	134		4		https://www.scopus.com/inward/record.uri?eid=2-s2.0-79955120112&partnerID=40&md5=6c25e13c99990a66ad09b01d956a29ac	China Institute of Water Resources and Hydropower Research, Beijing 100038, China; School of Urban Construction, Hebei University of Engineering, Handan 056038, China; Environmental Science and Engineering Department, Donghua University, Shanghai 201620, China; Department of Civil and Hydraulic Engineering, Dalian University of Technology, Dalian 116023, China	Zhang, C., China Institute of Water Resources and Hydropower Research, Beijing 100038, China; Yan, D.-H., China Institute of Water Resources and Hydropower Research, Beijing 100038, China; Hao, C.-L., China Institute of Water Resources and Hydropower Research, Beijing 100038, China, School of Urban Construction, Hebei University of Engineering, Handan 056038, China; Qin, T.-L., China Institute of…	As for key supporting technologies, studies on coordination between economic development and ecology conservation have attracted extensive attention in the assessment of ecosystem functions and ecosystem services. The study is especially relevant to the issues of water quality degradation and the deterioration of ecosystem functioning. In this study, certain hot issues on the subject including fu…	Advances; Ecosystem service; Key supported technologies; Water	Hydrogeology; Rating; Technology; Water pollution; Water quality; Advances; Assessment methods; Driving mechanism; Economic development; Ecosystem functioning; Ecosystem functions; Ecosystem service; Ecosystem services; Function identification; Future prospects; Hydrological models; Key supported technologies; Multidimensional analysis; Research models; Supporting technology; Technology applicati…												Daily, G.C., (1997) Nature's Services: Societal Dependence on Natural Ecosystem, pp. 1-32. , Washington D C: Island Press; Li, W.-H., Ouyang, Z.-Y., Zhao, J.-Z., (2002) Research on Ecosystem Services, pp. 250-255. , Beijing: China Meteorological Press, (in Chinese); Ouyang, Z.-Y., Zhao, T.-Q., Wang, X.-K., Ecosystem services analyses and valuation of China terrestrial surface water system (2004) …	Zhang, C.; China Institute of Water Resources and Hydropower Research, Beijing 100038, China; email: zhch16_1981@126.com			China Water Power Press					10016791		SHUJE		Chinese	Shuikexue Jinzhan	Review	Final
Keesstra S.D., Geissen V., Mosse K., Piiranen S., Scudiero E., Leistra M., van Schaik L.	8510883000;6602225881;36008883700;55485580300;55022751800;7003879709;57205410504;	Soil as a filter for groundwater quality	Exclude	-	2012	Current Opinion in Environmental Sustainability	4	5		507	516		232	10.1016/j.cosust.2012.10.007	https://www.scopus.com/inward/record.uri?eid=2-s2.0-84869159012&doi=10.1016%2fj.cosust.2012.10.007&partnerID=40&md5=9b603f4c29649571f17ab6de6b706a30	Land Degradation and Development Group, Wageningen University, Droevendaalsesteeg 4, 6708 PB, Wageningen, Netherlands; Land Dynamics Group, Wageningen University, Droevendaalsesteeg 3, 6708 PB, Wageningen, Netherlands; School of Applied Sciences and Engineering, Monash University, Churchill 3842, Australia; Finnish Forest Research Institute, Joensuu, P.O. Box 68, 80101 Joensuu, Finland; Dept. of …	Keesstra, S.D., Land Degradation and Development Group, Wageningen University, Droevendaalsesteeg 4, 6708 PB, Wageningen, Netherlands; Geissen, V., Land Dynamics Group, Wageningen University, Droevendaalsesteeg 3, 6708 PB, Wageningen, Netherlands; Mosse, K., School of Applied Sciences and Engineering, Monash University, Churchill 3842, Australia; Piiranen, S., Finnish Forest Research Institute, J…	The filtering function of soil is an important ecosystem service for groundwater and surface water protection. The efficiency of soils as a filter depends on the behaviour of pollutants in the soil and the hydrological transport processes. This paper aims to identify knowledge gaps in processes influencing pollutant behaviour in soils and their potential transport to groundwater. Currently most s…		agronomy; ecosystem service; environmental assessment; filtration; groundwater resource; hydrological response; pollutant transport; surface water; water quality					Deutsche Forschungsgemeinschaft, DFG: SCHR 1000/3-1, ZE 533/5-1; Università degli Studi di Padova, UNIPD	Information regarding saltwater intrusion in the Venetian coastland ( Box 6 ) was gained from the Research Programme “GEO-RISKS: Geological, morphological and hydrological processes: monitoring, modelling and impact in the north-eastern Italy”, WP4, funded by the University of Padova , Italy. Also the funding of the biopore project, provided by the DFG (grant no. SCHR 1000/3-1 and ZE 533/5-1 ) is…						Flury, M., Flühler, H., Jury, W.A., Leuenberger, J., Susceptibility of soils to preferential flow of water: a field study (1994) Water Resour Res, 30, pp. 1945-1954; Tiktak, A., de Nie, D.S., Piñeros Garcet, J.D., Jones, A., Vanclooster, M., Assessment of the pesticide leaching risk at the Pan-European level. The EuroPEARL approach (2004) J Hydrol, 289, pp. 222-238; El-Ashry, M.T., van Schilfgaar…	Keesstra, S.D.; Land Degradation and Development Group, Droevendaalsesteeg 4, 6708 PB, Wageningen, Netherlands; email: saskia.keesstra@wur.nl								18773435				English	Curr. Opin. Environ. Sustainability	Review	Final
Ojea E., Martin-Ortega J., Chiabai A.	14037994200;26648830100;13408642800;	Defining and classifying ecosystem services for economic valuation: The case of forest water services	Include	no	2012	Environmental Science and Policy	19-20			1	15		79	10.1016/j.envsci.2012.02.002	https://www.scopus.com/inward/record.uri?eid=2-s2.0-84858728820&doi=10.1016%2fj.envsci.2012.02.002&partnerID=40&md5=25d7306acb47ec57b5842e77ce2db48d	Basque Centre for Climate Change (BC3), Alameda Urquijo 4, 4-1, 48008 Bilbao, Spain; The James Hutton Institute (JHI), Craigiebuckler, Aberdeen AB15 8QH, Scotland, United Kingdom	Ojea, E., Basque Centre for Climate Change (BC3), Alameda Urquijo 4, 4-1, 48008 Bilbao, Spain; Martin-Ortega, J., The James Hutton Institute (JHI), Craigiebuckler, Aberdeen AB15 8QH, Scotland, United Kingdom; Chiabai, A., Basque Centre for Climate Change (BC3), Alameda Urquijo 4, 4-1, 48008 Bilbao, Spain	The Millennium Ecosystem Assessment (MA) has become widely accepted as a framework for understanding and assessing the benefits that ecosystems provide to human well-being. Its classification of services into the categories of provisioning, regulating, supporting and cultural, has been increasingly widely adopted. However, several authors have recently argued that the MA's definition and classifi…	Ecosystem services; Millennium Ecosystem Assessment; Tropical forests; Water services	article; classification; environmental economics; environmental impact; environmental management; environmental protection; forest; human; millennium ecosystem assessment; priority journal; water cycle; water flow; water quality; water supply					Fundación BBVA	Authors wish to thank Klaus Glenk for his very helpful comments on an earlier version of this paper. We would also like to thank the 2010 Bioecon Conference participants that provided very valuable comments, especially Nicholas Hanley, as well as two anonymous reviewers for their helpful insights. This study has been developed in the course of the CLIMBE project (Climate Change and Biodiversity E…						Adger, W.N., Brown, K., Cervigni, R., Moran, D., Total economic value of forest in Mexico (1995) Ambio, 24, pp. 286-296; Alyward, B., Land-use, hydrological function and economic valuation (2002) Proceedings of the UNESCO Symposium/Workshop Forest-Water-People in the Humid Tropics, , M. Bonell, L.A. Bruijnzeel (Eds.); Asquith, N.M., Vargas, M.T., Wunder, S., Selling two environmental services: in…	Ojea, E.; Basque Centre for Climate Change (BC3), Alameda Urquijo 4, 4-1, 48008 Bilbao, Spain; email: elena.ojea@bc3research.org								14629011		ESCPF		English	Environ. Sci. Policy	Article	Final
Willaarts B.A., Volk M., Aguilera P.A.	36348843600;7004320816;7003876321;	Assessing the ecosystem services supplied by freshwater flows in Mediterranean agroecosystems	Include	no	2012	Agricultural Water Management	105			21	31		65	10.1016/j.agwat.2011.12.019	https://www.scopus.com/inward/record.uri?eid=2-s2.0-84856977149&doi=10.1016%2fj.agwat.2011.12.019&partnerID=40&md5=567bb4d54d16b69d573d22c36d7039c7	Department of Plant Biology and Ecology, University of Almeria, Carretera de Sacramento s/n, 04120 Almeria, Spain; Department of Computational Landscape Ecology, UFZ, Helmholtz Centre for Environmental Research, Permoserstr. 15, D-04318 Leipzig, Germany	Willaarts, B.A., Department of Plant Biology and Ecology, University of Almeria, Carretera de Sacramento s/n, 04120 Almeria, Spain; Volk, M., Department of Computational Landscape Ecology, UFZ, Helmholtz Centre for Environmental Research, Permoserstr. 15, D-04318 Leipzig, Germany; Aguilera, P.A., Department of Plant Biology and Ecology, University of Almeria, Carretera de Sacramento s/n, 04120 Al…	Water performs essential ecological functions in agroecosystems and supplies an array of hydrologic ecosystem services (HES). The nature and quantity of HES is intimately linked with the management of the territory, and the capacity of the different land uses to partition rainfall into green (evapotranspiration) and blue (runoff) freshwater flows. This paper presents an innovative method to empir…	Agroecosystems; Blue water; GIS-based Hydrologic Modeling; Green water; Hydrologic ecosystem services	Agro-ecosystems; Blue water; GIS-based Hydrologic Modeling; Green water; Hydrologic ecosystem services; Forestry; Land use; Mathematical models; Profitability; Timber; Water supply; Ecosystems; agricultural ecosystem; ecosystem service; empirical analysis; evapotranspiration; GIS; hot spot; Mediterranean environment; rainfall; runoff; territory; water management; water planning; Ecosystems; Fores…					UAL-CG 400431	This research was supported by the Regional Environmental Government of Andalucía through the project “Ecological and Socio-economic Assessment of the Ecosystem Services supplied by the Network of Protected Areas in Andalusia” ( UAL-CG 400431 ). The authors acknowledge the valuable comments for the manuscript provided by two anonymous reviewers, who helped to focus and make improvements to the pa…						Andreo, B., Vías, J., López-Jeta, J.A., Carrasco, F., Durán, J.J., Jiménez, P., Propuesta metodológica para la estimación de la recarga de acuíferos carbonáticos (2004) Bol. Geol. Min., 115, pp. 177-186; Binning, C., Cork, S., Parry, R., Shelton, D., (2001) Natural Assets: An Inventory of Ecosystem Goods and Services in the Goulburn Broken Catchment, , CSIRO, Canberra; Brauman, K.A., Daily, G.C.,…	Willaarts, B.A.; CEIGRAM, Campos de Prácticas de Agrónomos, 28040 Madrid, Spain; email: barbara.willaarts@upm.es								3783774		AWMAD		English	Agric. Water Manage.	Article	Final
Lopa D., Mwanyoka I., Jambiya G., Massoud T., Harrison P., Ellis-Jones M., Blomley T., Leimona B., Van Noordwijk M., Burgess N.D.	52264078400;35776791700;8894380800;7006114430;36988695300;55053413200;24465052900;23987293400;7003897764;35301788600;	Towards operational payments for water ecosystem services in Tanzania: A case study from the Uluguru Mountains	Include	no	2012	ORYX	46	1		34	44		41	10.1017/S0030605311001335	https://www.scopus.com/inward/record.uri?eid=2-s2.0-84857744871&doi=10.1017%2fS0030605311001335&partnerID=40&md5=32ee890b6ec8212ab53565d21109caf1	CARE International in Tanzania, Dar es Salaam, Tanzania; WWF, Tanzania Country Offices, Dar es Salaam, Tanzania; Department of Geography, University of Dar Es Salaam, Dar es Salaam, Tanzania; Kilimanyika Limited, Bicester, United Kingdom; Acacia Natural Resource Consultants Ltd, Reading, United Kingdom; ICRAF, Nairobi, Kenya; Centre for Macroecology, Evolution and Climate, Department of Biology, …	Lopa, D., CARE International in Tanzania, Dar es Salaam, Tanzania; Mwanyoka, I., WWF, Tanzania Country Offices, Dar es Salaam, Tanzania; Jambiya, G., WWF, Tanzania Country Offices, Dar es Salaam, Tanzania, Department of Geography, University of Dar Es Salaam, Dar es Salaam, Tanzania; Massoud, T., CARE International in Tanzania, Dar es Salaam, Tanzania; Harrison, P., Kilimanyika Limited, Bicester,…	Sustaining the regular flow of water from mountain forests is important for downstream stakeholders in seasonally dry tropical countries, and a watershed payment for ecosystem services (PES) scheme that links rural ecosystem service providers to urban water users through economic transfers may help to maintain water supply and forest habitat. A CARE/WWF project in the Uluguru Mountains of Tanzani…	Africa; direct payments for conservation; Eastern Arc Mountains; payment for ecosystem services; PES; Tanzania; tropical forest; Uluguru Mountains	aquatic ecosystem; ecosystem service; environmental economics; incentive; land use change; montane forest; profitability; rural area; seasonality; service provision; stakeholder; streamwater; sustainability; tropical environment; tropical forest; urban area; water flow; water quality; water supply; watershed; Dar es Salaam [Tanzania]; Eastern Arc Mountains; Tanzania; Uluguru Mountains												Asquith, N.M., Vargasa, M.T., Wunder, S., Selling two environmental services: In kind payments for bird habitat and watershed protection in Los Negros, Bolivia (2008) Ecological Economics, 65, pp. 675-684; Balmford, A., Bruner, A., Cooper, P., Costanza, R., Farber, S., Green, R.E., Jenkins, M., Turner, R.K., Ecology: Economic reasons for conserving wild nature (2002) Science, 297 (5583), pp. 950-…	Burgess, N.D.; Centre for Macroecology, Evolution and Climate, Denmark; email: ndburgess@bio.ku.dk								306053		ORYXA		English	ORYX	Article	Final	All Open Access, Bronze, Green
Martin-Ortega J., Ojea E., Roux C.	26648830100;14037994200;55929083900;	Payments for water ecosystem services in Latin America: A literature review and conceptual model	Include	no	2013	Ecosystem Services	6			122	132		95	10.1016/j.ecoser.2013.09.008	https://www.scopus.com/inward/record.uri?eid=2-s2.0-84890120512&doi=10.1016%2fj.ecoser.2013.09.008&partnerID=40&md5=11827f6f0afb7365ad8287a867972fbd	The James Hutton Institute, Craigiebuckler, AB15 8QH Aberdeen, United Kingdom; BC3. Basque Centre for Climate Change, Alameda Urquijo 4, 4a, 48008 Bilbao, Spain; Bren School of Environmental Science and Management-UCSB, United States; AgroParisTech, Centre de Paris Maine, 19 avenue du Maine, 75732 Paris cedex 15, France	Martin-Ortega, J., The James Hutton Institute, Craigiebuckler, AB15 8QH Aberdeen, United Kingdom; Ojea, E., BC3. Basque Centre for Climate Change, Alameda Urquijo 4, 4a, 48008 Bilbao, Spain, Bren School of Environmental Science and Management-UCSB, United States; Roux, C., AgroParisTech, Centre de Paris Maine, 19 avenue du Maine, 75732 Paris cedex 15, France	Latin America has been a pioneer in the implementation of payments for ecosystem services (PES) and numerous schemes are now in place. However, existing reviews of this experience are mostly theoretical and/or qualitative. This paper presents a comprehensive, systematic and up-to-date compilation and review of the literature on Payments for Water Ecosystem Services (PWS) in Latin America, in whic…	Conditionality; Deforestation; Ecosystem services; Financial incentives; Water markets							Authors are grateful to Ken Thomson, Sebastiaan Hess and Kerry Waylen for their valuable comments to an earlier version of this article. The work of Dr. Julia Martin-Ortega has been funded by the Scottish Government Rural Affairs and the Environment Portfolio Strategic Research Programme 2011–2016 , Theme 1 (Environmental Change: Ecosystem Services and Biodiversity; WP1.2. Assessing the Value of …						Asquith, N.M., Vargas, M.T., Wunder, S., Selling two environmental services: in-kind payments for bird habitat and watershed protection in Los Negros, Bolivia (2008) Ecological Economics, 65, pp. 676-685; Barrantes, G., Gomez, L., (2007), Capitulo 14. Programa de Pago por Servicio Ambiental Hídrico de la de la Empresa de Servicios Públicos de Heredia; Blackman, A., Woodward, R.T., User financing …	Martin-Ortega, J.; The James Hutton Institute, Craigiebuckler, AB15 8QH Aberdeen, United Kingdom; email: julia.martinortega@hutton.ac.uk								22120416				English	Ecosyst. Serv.	Review	Final
Gupta J., Pahl-Wostl C.	7202539901;6701479303;	Global water governance in the context of global and multilevel governance: Its need, form, and challenges	Exclude	-	2013	Ecology and Society	18	4	53				36	10.5751/ES-05952-180453	https://www.scopus.com/inward/record.uri?eid=2-s2.0-84890215425&doi=10.5751%2fES-05952-180453&partnerID=40&md5=2c54030cc98df3d6504db527e5ad09a6	Amsterdam Institute for Social Science Research, University of Amsterdam, Netherlands; UNESCO-IHE Institute for Water Education, Netherlands; Institute of Environmental Systems Research, University of Osnabrück, Germany	Gupta, J., Amsterdam Institute for Social Science Research, University of Amsterdam, Netherlands, UNESCO-IHE Institute for Water Education, Netherlands; Pahl-Wostl, C., Institute of Environmental Systems Research, University of Osnabrück, Germany	To complement this Special Feature on global water governance, we focused on a generic challenge at the global level, namely, the degree to which water issues need to be dealt with in a centralized, concentrated, and hierarchical manner. We examined water ecosystem services and their impact on human well-being, the role of policies, indirect and direct drivers in influencing these services, and t…	Global governance; Multilevel governance; Scale; Water governance	ecosystem service; governance approach; hierarchical system; sustainable development; water management												Agyenim, J.B., Gupta, J., The evolution of Ghana's water law and policy (2010) Review of European Community & International Environmental Law, 19 (3), pp. 339-350. , http://dx.doi.org/10.1111/j.1467-9388.2010.00694.x; Andersson, K.P., Ostrom, E., Analyzing decentralized resource regimes from a polycentric perspective (2008) Policy Sciences, 41, pp. 71-93. , http://dx.doi.org/10.1007/s11077-007-90…	Gupta, J.; Department of Geography, Planning and International Development Studies, Plantage Muidergracht 14, 1018 TV Amsterdam, Netherlands; email: J.Gupta@uva.nl								17083087				English	Ecol. Soc.	Article	Final	All Open Access, Gold, Green
Knüppe K., Pahl-Wostl C.	36895074700;6701479303;	Requirements for adaptive governance of groundwater ecosystem services: Insights from Sandveld (South Africa), Upper Guadiana (Spain) and Spree (Germany)	Exclude	-	2013	Regional Environmental Change	13	1		53	66		20	10.1007/s10113-012-0312-7	https://www.scopus.com/inward/record.uri?eid=2-s2.0-84873522672&doi=10.1007%2fs10113-012-0312-7&partnerID=40&md5=f6c5fb9ac702e9c0a062551a841947fc	Institute of Environmental Systems Research, University of Osnabrück, Barbarastraße 12, 49076 Osnabrück, Germany	Knüppe, K., Institute of Environmental Systems Research, University of Osnabrück, Barbarastraße 12, 49076 Osnabrück, Germany; Pahl-Wostl, C., Institute of Environmental Systems Research, University of Osnabrück, Barbarastraße 12, 49076 Osnabrück, Germany	The over-abstraction of aquifers and the modification of landscape-water systems often result in the degradation of groundwater resources and the loss of related ecosystem services. Many of these problems are associated with failure of governance and management regimes. Thus, groundwater resources require innovative approaches that deal with system complexity moving governments toward adaptive an…	Adaptive management; Case study research; Ecosystem services; Groundwater; Management and Transition Framework; Vertical and horizontal integration													Archer, E., Conrad, J., Münch, Z., Opperman, D., Tadross, M., Venter, J., Climate change, groundwater and intensive commercial farming in the semi-arid northern Sandveld, South Africa (2009) J Integr Environ Sci, 6 (2), pp. 139-155. , doi:10.1080/19438150902916589; Ashton, P.J., Turton, A.R., Roux, D.J., Exploring the government, society, and science interfaces in integrated water resource manage…	Knüppe, K.; Institute of Environmental Systems Research, Barbarastraße 12, 49076 Osnabrück, Germany; email: kathrin.knueppe@uos.de			Springer Verlag					14363798				English	Reg. Environ. Change	Article	Final
Zander K.K., Parkes R., Straton A., Garnett S.T.	57205449913;55745396500;8573725700;7004285282;	Water Ecosystem Services in Northern Australia-How Much Are They Worth and Who Should Pay for Their Provision?	Exclude	-	2013	PLoS ONE	8	5	e64411				17	10.1371/journal.pone.0064411	https://www.scopus.com/inward/record.uri?eid=2-s2.0-84878164421&doi=10.1371%2fjournal.pone.0064411&partnerID=40&md5=91913491bc2683abb54d0d5ce4250ca4	The Northern Institute, Charles Darwin University, Darwin, NT, Australia; School of Health, Business and Science, Batchelor Institute of Indigenous Tertiary Education, Katherine, NT, Australia; Victorian Department of Primary Industries, Melbourne, VIC, Australia; Research Institute for the Environment and Livelihoods, Charles Darwin University, Darwin, NT, Australia	Zander, K.K., The Northern Institute, Charles Darwin University, Darwin, NT, Australia; Parkes, R., School of Health, Business and Science, Batchelor Institute of Indigenous Tertiary Education, Katherine, NT, Australia; Straton, A., Victorian Department of Primary Industries, Melbourne, VIC, Australia; Garnett, S.T., Research Institute for the Environment and Livelihoods, Charles Darwin Universit…	There is ongoing pressure to develop the largely unaltered Daly River catchment in northern Australia for agriculture. However, a choice experiment among people in the region and in Australia's largest city, Sydney, shows that people are prepared to pay substantial amounts to maintain the quality of its ecosystem services. The total stated willingness-to-pay (WTP) for a Daly River conservation pr…		Aborigine; adolescent; adult; aged; agricultural management; article; Australia; biodiversity; catchment; cost benefit analysis; cultural value; decision making; female; fishing; human; investment; irrigation (agriculture); male; quality control; recreation; river ecosystem; economics; ecosystem; environmental protection; questionnaire; river; statistical model; water; Australia; Choice Behavior;…		water, 7732-18-5; Water										Ferraro, P.J., Simpson, R.D., The cost-effectiveness of conservation payments (2002) Land Econ, 78, pp. 339-353; Grieg-Gran, M., Porras, I.T., Wunder, S., How can market mechanisms for forest environmental services help the poor? Preliminary lessons from Latin America (2005) World Dev, 33, pp. 1511-1527; Wunder, S., The efficiency of payments for environmental services in tropical conservation (2…	Zander, K. K.; The Northern Institute, , Darwin, NT, Australia; email: Kerstin.zander@cdu.edu.au								19326203			23717611	English	PLoS ONE	Article	Final	All Open Access, Gold, Green
Feger K.-H., Hawtree D.	6701607867;56719656100;	Soil carbon and water security	Include	no	2013	Ecosystem Services and Carbon Sequestration in the Biosphere				79	99		4	10.1007/978-94-007-6455-2_5	https://www.scopus.com/inward/record.uri?eid=2-s2.0-84948690050&doi=10.1007%2f978-94-007-6455-2_5&partnerID=40&md5=f892ac18585586a421684f04073c47bf	Institute of Soil Science and Site Ecology, Dresden Water Center, Faculty of Environmental Sciences, Technische Universität Dresden, Pienner Str. 19, Tharandt, 01737, Germany	Feger, K.-H., Institute of Soil Science and Site Ecology, Dresden Water Center, Faculty of Environmental Sciences, Technische Universität Dresden, Pienner Str. 19, Tharandt, 01737, Germany; Hawtree, D., Institute of Soil Science and Site Ecology, Dresden Water Center, Faculty of Environmental Sciences, Technische Universität Dresden, Pienner Str. 19, Tharandt, 01737, Germany	The provision of hydrologic ecosystem services (HES) is critical for both human well-being and environmental sustainability. A key component in addressing current and future challenges in water resource management is the development of a comprehensive understanding of the complex relationships between soil properties, land use/management, and the hydrologic cycle. The soil-water interface is crit…	Blue water; Dissolved organic carbon; Drinking water; Erosion; Flood retention; Green water; Hydrologic ecosystem services; Infiltration; Integrated land and water resource management; Land use; Soil degradation; Soil functions; Soil organic carbon; Soil organic matter; Soil quality; Soil structure; Water cycle; Water security	Agriculture; Aquatic ecosystems; Biogeochemistry; Biological materials; Chemicals removal (water treatment); Climate change; Cultivation; Ecology; Ecosystems; Erosion; Food supply; Infiltration; Information management; Land use; Natural resources management; Organic carbon; Organic compounds; Potable water; Process control; Quality control; Reforestation; Resource allocation; Soil conservation; S…												Aitkenhead, J.A., Hope, D., Billett, M.F., The relationship between dissolved organic carbon in stream water and soil organic carbon pools at different spatial scales (1999) Hydrol Process, 13, pp. 1289-1302; Allan, D.L., Adriano, D.C., Bezdicek, D.F., (1995) SSSA Statement on Soil Quality, , ASA, Madison; Baldock, J.A., Nelson, P.N., Soil organic matter (2000) Handbook of Soil Science, , Sumner …	Feger, K.-H.; Institute of Soil Science and Site Ecology, Pienner Str. 19, Germany; email: feger@mail.zih.tu-dresden.de			Springer Netherlands						9789400764552; 9789400764545			English	Ecosystem Services and Carbon Sequestration in the Biosphere	Book Chapter	Final
Müller M.F., Dralle D.N., Thompson S.E.	57189929871;35181040100;36145416000;	Analytical model for flow duration curves in seasonally dry climates	Exclude	-	2014	Water Resources Research	50	7		5510	5531		52	10.1002/2014WR015301	https://www.scopus.com/inward/record.uri?eid=2-s2.0-84903687789&doi=10.1002%2f2014WR015301&partnerID=40&md5=e39c1ba18906b9ceef031d5d4e2daac3	Department of Civil and Environmental Engineering, University of California, Berkeley, CA, United States	Müller, M.F., Department of Civil and Environmental Engineering, University of California, Berkeley, CA, United States; Dralle, D.N., Department of Civil and Environmental Engineering, University of California, Berkeley, CA, United States; Thompson, S.E., Department of Civil and Environmental Engineering, University of California, Berkeley, CA, United States	Flow duration curves (FDC) display streamflow values against their relative exceedance time. They provide critical information for watershed management by representing the variation in the availability and reliability of surface water to supply ecosystem services and satisfy anthropogenic needs. FDCs are particularly revealing in seasonally dry climates, where surface water supplies are highly va…	flow duration curve; hydropower; Mediterranean; monsoon; Nepal; probabilistic													Acreman, M., Dunbar, M.J., Defining environmental river flow requirements - A review (1999) Hydrol. Earth Syst. Sci., 8 (5), pp. 861-876. , doi: 10.5194/hess-8-861-2004; Alaouze, C.M., Reservoir releases to uses with different reliability requirements (1989) Water Resour. Bull., 25 (6), pp. 1163-1168. , doi: 10.1111/j.1752-1688.1989.tb01328.x; Andermann, C., Longuevergne, L., Bonnet, S., Crave, A…	Müller, M.F.; Department of Civil and Environmental Engineering, University of California, Berkeley, CA, United States; email: marc.muller@berkeley.edu			Blackwell Publishing Ltd					431397		WRERA		English	Water Resour. Res.	Article	Final	All Open Access, Green
Wahid S.M., Shrestha A.B., Murthy M.S.R., Matin M., Zhang J., Siddiqui O.	15754762900;7003751915;8663667000;35576373500;35212366900;56448510900;	Regional water security in the hindu kush himalayan region: Role of geospatial science and tools	Exclude	-	2014	International Archives of the Photogrammetry, Remote Sensing and Spatial Information Sciences - ISPRS Archives	XL-8	1		1331	1340		2	10.5194/isprsarchives-XL-8-1331-2014	https://www.scopus.com/inward/record.uri?eid=2-s2.0-84918567960&doi=10.5194%2fisprsarchives-XL-8-1331-2014&partnerID=40&md5=cde4f632f4889ed29a61fa3957d42f00	International Center for Integrated Mountain Development, Lalitpur, Kathmandu, Nepal; Chinese Academy of Sciences (CAS), China	Wahid, S.M., International Center for Integrated Mountain Development, Lalitpur, Kathmandu, Nepal; Shrestha, A.B., International Center for Integrated Mountain Development, Lalitpur, Kathmandu, Nepal; Murthy, M.S.R., International Center for Integrated Mountain Development, Lalitpur, Kathmandu, Nepal; Matin, M., International Center for Integrated Mountain Development, Lalitpur, Kathmandu, Nepal;…	The Hindu Kush Himalayan (HKH) region is the source of ten large Asian river systems - the Amu Darya, Indus, Ganges, Brahmaputra (Yarlungtsanpo), Irrawaddy, Salween (Nu), Mekong (Lancang), Yangtse (Jinsha), Yellow River (Huanghe), and Tarim (Dayan), - and provides water, ecosystem services, and the basis for livelihoods to a population of around 0.2 billion people in the region. The river basins …	Disaster risk reduction; Hindu kush himalayan river basins; Water resources assessment	Computational methods; Ecosystems; Information management; Land use; Multi agent systems; Risk assessment; Water management; Watersheds; Disaster risk reductions; Economic and social benefits; Himalayan rivers; Hydrological modelling; Land use and land cover change; River basin management; Water resources assessment; Water vulnerabilities; Rivers												Alford, R.A., Bradfield, K.S., Richards, S.J., Ecology: Global warming and amphibian losses (2007) Nature, 447, pp. E3-E4; Alix-Garcia, J., De Janvry, A., Sadoulet, E., The role of deforestation risk and calibrated compensation in designing payments for environmental services (2008) Environment and Development Economics, 13, pp. 375-394; Alsdorf, D.E., Melack, J.M., Dunne, T., Mertes, L.A.K., Hes…	Wahid, S.M.; International Center for Integrated Mountain DevelopmentNepal	Dadhwal V.K.Seshasai M.V.R.Hakeem A.Diwakar P.G.Raju P.L.N.		International Society for Photogrammetry and Remote Sensing	ISPRS Technical Commission 8th Mid-Term Symposium 2014	9 December 2014 through 12 December 2014		109460	16821750				English	Int. Arch. Photogramm., Remote Sens. Spat. Inf. Sci. - ISPRS Arch.	Conference Paper	Final	All Open Access, Gold, Green
Hao C.L., Yan D.H., Qin T.L., Zhang C., Yin J.	35193875600;7401863116;36537757100;55559133500;54796295800;	Water ecosystem services and their value-a case study in Luan River basin, North China	Include	dust retention, NOX absorption, wind protection and sand fixation	2014	Applied Mechanics and Materials	448-453			225	234		2	10.4028/www.scientific.net/AMM.448-453.225	https://www.scopus.com/inward/record.uri?eid=2-s2.0-84887563323&doi=10.4028%2fwww.scientific.net%2fAMM.448-453.225&partnerID=40&md5=c25958b6e76f7fe4346f61dc3cbcf22d	Environmental Science and Engineering Department, Donghua University, Shanghai, 201620, China; Water Resources Department, China Institute of Water Resources and Hydropower Research, Beijing, 100038, China	Hao, C.L., Environmental Science and Engineering Department, Donghua University, Shanghai, 201620, China, Water Resources Department, China Institute of Water Resources and Hydropower Research, Beijing, 100038, China; Yan, D.H., Water Resources Department, China Institute of Water Resources and Hydropower Research, Beijing, 100038, China; Qin, T.L., Water Resources Department, China Institute of …	Under a scenario of global climate change, the water ecosystem services of Luan River basin have attracted considerable public attention. In this paper, the term of water ecosystem services is described as Green water and blue water formed from the water cycle process to provide the conditions and utility for maintaining the structure and process of forest, grassland, wetland, lake, river ecosyst…	Luan River basin; Magnitudes values; Monetary values; Water ecosystem service; Water resources value	Economic value of water; Ecosystem services; Global climate changes; Magnitudes values; Monetary value; River basins; Social economic system; Water ecosystems; Climate change; Economics; Environmental technology; Hydrogeology; Water resources; Water supply; Watersheds; Ecosystems												Hao, W., Jianhua, W., Dayong, Q., (2004) Advances In Water Science: Forum, 15, pp. 123-128. , (in Chinese); Denghua, Y., Hao, W., Shuyuan, Y., (2008) Journal of Hydraulic Engineering: Forum, p. 19; Wang, J.F., Cheng, G.D., Gao, Y.G., (2008) Water Resource Manage: Forum, 22, pp. 239-258; Chen, C.C., Hsu, S.H., (2010) Water Resource Manage: Forum, 24, pp. 3237-3256; (1996) Assessment of the Economi…	Environmental Science and Engineering Department, , Shanghai, 201620, China				2013 International Conference on Renewable Energy and Environmental Technology, REET 2013	21 September 2013 through 22 September 2013	Jilin	100876	16609336	9783037859124			English	Appl. Mech. Mater.	Conference Paper	Final
Henkel M., Lodemann J.	57126910800;37003035200;	Financing water ecosystem services - Marta Echavarria and EcoDecisión	Exclude	-	2014	Social Entrepreneurship in the Water Sector: Getting Things Done Sustainably				133	156			10.4337/9781783471317.00014	https://www.scopus.com/inward/record.uri?eid=2-s2.0-84958635650&doi=10.4337%2f9781783471317.00014&partnerID=40&md5=28690533959c39b8d3419e46034588f8	Universität Greifswald, Germany	Henkel, M., Universität Greifswald, Germany; Lodemann, J., Universität Greifswald, Germany	As we arrived by plane in Quito, the capital of Ecuador, we flew over an ocean of houses covering a narrow mountain valley that stretches for more than 30 kilometres, seldom wider than 5 kilometres, and is part of the Guayllabamba River Basin. Impressive volcanic mountains, some of which are still active, flank the city. With an altitude of 2800 m above sea level, Quito is the highest capital cit…																		Edward Elgar Publishing Ltd.						9781783471317; 9781783471300			English	Social Entrepreneurship in the Water Sector: Get. Things Done Sustainably	Book Chapter	Final
Griebler C., Avramov M.	6603007488;42361063400;	Groundwater ecosystem services: A review	Include	no	2015	Freshwater Science	34	1		355	367		128	10.1086/679903	https://www.scopus.com/inward/record.uri?eid=2-s2.0-84929619697&doi=10.1086%2f679903&partnerID=40&md5=a55cb5d49c82767c0fa1572d1ec07c91	Helmholtz Zentrum München, German Research Center for Environmental Health, Institute of Groundwater Ecology, Ingolstaedter Landstrasse 1, Neuherberg, D-85764, Germany	Griebler, C., Helmholtz Zentrum München, German Research Center for Environmental Health, Institute of Groundwater Ecology, Ingolstaedter Landstrasse 1, Neuherberg, D-85764, Germany; Avramov, M., Helmholtz Zentrum München, German Research Center for Environmental Health, Institute of Groundwater Ecology, Ingolstaedter Landstrasse 1, Neuherberg, D-85764, Germany	Our daily life depends on many services delivered by the planet's ecosystems. Groundwater ecosystems deliver services that are of immense societal and economic value, such as: 1) purification of water and its storage in good quality for decades and centuries, 2) active biodegradation of anthropogenic contaminants and inactivation and elimination of pathogens, 3) nutrient recycling, and 4) mitigat…	Biodegradation; Biodiversity; Bioindicators; Ecosystem services; Ground water; Pathogens	anthropogenic effect; biodegradation; biodiversity; bioindicator; drought; ecosystem service; flood control; groundwater; pathogen; purification; spatiotemporal analysis; sustainability; water quality; water storage; Metazoa												Aamand, J., Jørgensen, C., Arvin, E., Jensen, B.K., Microbial adaptation to degradation of hydrocarbons in polluted and unpolluted groundwater (1989) Journal of Contaminant Hydrology, 4, pp. 299-312; Alfreider, A., Krössbacher, M., Psenner, R., Groundwater samples do not reflect bacterial densities and activity in subsurface systems (1997) Water Research, 31, pp. 832-840; Alfreider, A., Vogt, C.,…				North American Benthological Society					21619549				English	Freshwater Sci.	Review	Final
Qiu J., Turner M.G.	37073321200;7403215651;	Importance of landscape heterogeneity in sustaining hydrologic ecosystem services in an agricultural watershed	Exclude	-	2015	Ecosphere	6	11	229				62	10.1890/ES15-00312.1	https://www.scopus.com/inward/record.uri?eid=2-s2.0-84948961201&doi=10.1890%2fES15-00312.1&partnerID=40&md5=3de34f0bef74b9d33fb520c47437c4d7	Department of Zoology, University of Wisconsin-Madison, Madison, WI 53706, United States	Qiu, J., Department of Zoology, University of Wisconsin-Madison, Madison, WI 53706, United States; Turner, M.G., Department of Zoology, University of Wisconsin-Madison, Madison, WI 53706, United States	The sustainability of hydrologic ecosystem services (freshwater benefits to people generated by terrestrial ecosystems) is challenged by human modification of landscapes. However, the role of landscape heterogeneity in sustaining hydrologic services at scales relevant to landscape management decisions is poorly understood. In particular, the relative importance of landscape composition (type and …	Agricultural landscape; Land management; Landscape ecology; Nonlinearity; Spatial configuration; Spatial heterogeneity; Sustainability; Synergies; Tradeoffs						National Science Foundation, NSF: 1038759, 1440297							Alberti, M., Booth, D., Hill, K., Cohurn, B., Avolio, C., Coe, S., Spirandelli, D., The impact of urban patterns on aquatic ecosystems: An empirical analysis in Puget lowland sub-basins (2007) Landscape and Urban Planning, 80, pp. 345-361; Allan, J.D., Landscapes and riverscapes: The influence of land use on stream ecosystems (2004) Annual Review of Ecology Evolution and Systematics, 35, pp. 257-…				Ecological Society of America					21508925				English	Ecosphere	Article	Final	All Open Access, Gold, Green
Martin-Ortega J., Ferrier R.C., Gordon I.J., Khan S.	26648830100;7006540697;57205697885;55661466900;	Water ecosystem services: A global perspective	Exclude	-	2015	Water Ecosystem Services: A Global Perspective				1	174		39	10.1017/CBO9781316178904	https://www.scopus.com/inward/record.uri?eid=2-s2.0-85011321043&doi=10.1017%2fCBO9781316178904&partnerID=40&md5=c9322bfc19a78ee20a9e7d838051ac9c	Social, Economic and Geographical Sciences Group, The James Hutton Institute, Craigiebuckler, Aberdeen, AB15 8QH, United Kingdom; The James Hutton Institute, Invergowrie, Dundee, DD2 5DA, United Kingdom; UNESCO Regional Science Bureau for Asia and the Pacific, DKI, Jakarta, 12110, Indonesia	Martin-Ortega, J., Social, Economic and Geographical Sciences Group, The James Hutton Institute, Craigiebuckler, Aberdeen, AB15 8QH, United Kingdom; Ferrier, R.C., Social, Economic and Geographical Sciences Group, The James Hutton Institute, Craigiebuckler, Aberdeen, AB15 8QH, United Kingdom; Gordon, I.J., The James Hutton Institute, Invergowrie, Dundee, DD2 5DA, United Kingdom; Khan, S., UNESCO …	This comprehensive volume describes how ecosystem services-based approaches can assist in addressing major global and regional water challenges, such as climate change, biodiversity loss, and water security in the developing world, by integrating scientific knowledge from different disciplines, such as hydrological modelling, environmental economics, psychology and international law. Empirical as…																		Cambridge University Press						9781316178904; 9781107100374			English	Water Ecosystem Services: A Global Perspective	Book	Final
Ojea E., Martin-Ortega J.	14037994200;26648830100;	Understanding the economic value of water ecosystem services from tropical forests: A systematic review for South and Central America	Exclude	-	2015	Journal of Forest Economics	21	2		97	106		15	10.1016/j.jfe.2015.02.001	https://www.scopus.com/inward/record.uri?eid=2-s2.0-84929945928&doi=10.1016%2fj.jfe.2015.02.001&partnerID=40&md5=a96d8a486cea2011524af5efe7deb8ba	Basque Centre for Climate Change (BC3), Alameda Urquijo 4, 4-1, Bilbao, 48008, Spain; Bren School for Environmental Science and Management, UCSB, Santa Barbara, CA 93106, United States; Social, Economic and Geographical Sciences Group, The James Hutton Institute, Craigiebuckler, Aberdeen, AB15 8QH, United Kingdom	Ojea, E., Basque Centre for Climate Change (BC3), Alameda Urquijo 4, 4-1, Bilbao, 48008, Spain, Bren School for Environmental Science and Management, UCSB, Santa Barbara, CA 93106, United States; Martin-Ortega, J., Social, Economic and Geographical Sciences Group, The James Hutton Institute, Craigiebuckler, Aberdeen, AB15 8QH, United Kingdom	There is a well-established body of literature on monetary valuation of water ecosystem services to support the case for sustaining tropical forests. However, this literature is heterogeneous in its purposes and approaches and has not been carefully compared, providing a fragmented view of the values of forest water services. This paper addresses this knowledge gap through an orderly review and a…	Extractive water supply; In-stream water supply; Latin America; Meta-analysis; Service users; Water services	Decision making; Economics; Forestry; Hydrogeology; Tropics; Water supply; Latin America; Meta analysis; Service users; Stream water; Water service; Ecosystems; ecological economics; ecosystem service; meta-analysis; tropical forest; water supply; Central America; Latin America; South America					Fundación BBVA	The authors wish to thank the editor and anonymous reviewers for very helpful comments that improved the final version of this research piece. Dr. Ojea wishes to thank Bizkaia Xede Mobility Grant 2013, and Dr. Martin-Ortega acknowledges the Scottish Government Rural Affairs and the Environment Portfolio Strategic Research Programme 2011–2016, Theme 1 (WP1.2. Assessing the Value of Ecosystem Servi…						Acreman, M., Ethical aspects of water and ecosystems (2001) Water Policy, 3, pp. 257-265; Adger, W.N., Brown, K., Cervigni, R., Moran, D., Total economic value of forest in Mexico (1995) Ambio, 24, pp. 286-296; Agrawal, A., Nepstad, D., Chhatre, A., Reducing emissions from deforestation and forest degradation (2011) Annu. Rev. Environ. Resour., 36, pp. 373-396; Asquith, N.M., Vargas, M.T., Wunder…	Ojea, E.; Basque Centre for Climate Change (BC3), Alameda Urquijo 4, 4-1, Spain; email: elena.ojea@bc3research.org			Elsevier GmbH					11046899				English	J. For. Econ.	Article	Final	All Open Access, Green
Capon S.J., Bunn S.E.	6602628508;7007032760;	Assessing climate change risks and prioritising adaptation options using a water ecosystem services-based approach	Include	no	2015	Water Ecosystem Services: A Global Perspective				17	25		12	10.1017/CBO9781316178904.004	https://www.scopus.com/inward/record.uri?eid=2-s2.0-85011411927&doi=10.1017%2fCBO9781316178904.004&partnerID=40&md5=fdf8a6ef0a6010a211e4db0fcaeddad1	Australian Rivers Institute, Griffith University, Nathan, QLD, Australia	Capon, S.J., Australian Rivers Institute, Griffith University, Nathan, QLD, Australia; Bunn, S.E., Australian Rivers Institute, Griffith University, Nathan, QLD, Australia	3.1 INTRODUCTION Climate change poses a significant threat to the capacity of the world’s freshwater ecosystems to provide critical water ecosystem services upon which both human and non-human systems rely (Bates et al. 2008). High degrees of exposure and sensitivity to climate change effects, amplified by the position of freshwater ecosystems in the landscape and constraints on their adaptive ca…														Barnett, J.A., O’Neill, S., Maladaptation (2010) Global Environmental Change, 20, pp. 211-213; Bates, B.C., Kundzewicz, Z.W., Wu, S., Palutikof, J.P., (2008) Climate Change and Water., , Technical Paper of the Intergovernmental Panel on Climate Change, IPCC Secretariat, Geneva; Cai, W., Cowan, T., Evidence of impacts from rising temperature on inflows to the Murray-Darling Basin (2008) Geophysica…				Cambridge University Press						9781316178904; 9781107100374			English	Water Ecosystem Services: A Global Perspective	Book Chapter	Final
Mulligan M., Benítez-Ponce S., Lozano-V J.S., Sarmiento J.L.	57208275038;57193162927;57193171502;57225473556;	Policy support systems for the development of benefit-sharing mechanisms for water-related ecosystem services	Exclude	-	2015	Water Ecosystem Services: A Global Perspective				99	109		4	10.1017/CBO9781316178904.013	https://www.scopus.com/inward/record.uri?eid=2-s2.0-85011382975&doi=10.1017%2fCBO9781316178904.013&partnerID=40&md5=23836ae052cbbe011610b1ad3c3efd59	Department of Geography, King’s College London, Strand, London, WC2R 2LS, United Kingdom; The Nature Conservancy, Los Naranjos N 44 491 y Azucenas (Monteserrín), Quito, 170507, Ecuador; The Nature Conservancy, Calle 67 # 7-94, Piso 3, Torre Colfondos, Bogotá, 11001000, Colombia	Mulligan, M., Department of Geography, King’s College London, Strand, London, WC2R 2LS, United Kingdom; Benítez-Ponce, S., The Nature Conservancy, Los Naranjos N 44 491 y Azucenas (Monteserrín), Quito, 170507, Ecuador; Lozano-V, J.S., The Nature Conservancy, Calle 67 # 7-94, Piso 3, Torre Colfondos, Bogotá, 11001000, Colombia; Sarmiento, J.L., The Nature Conservancy, Calle 67 # 7-94, Piso 3, Torr…	12.1 INTRODUCTION There are a number of persistent oversimplifications in the lay understanding of water ecosystem services; for example: forests generate more water, forests prevent floods, forests sustain dry season flows, forests improve water quality. The reality is that the role of forests in water ecosystem services depends on (1) the landscape and climate context (terrain, rainfall, season…														Bagstad, K.J., Semmens, D.J., Waage, S., Winthrop, R., A comparative assessment of decision-support tools for ecosystem services quantification and valuation (2013) Ecosystem Services, 5, pp. 27-49; (2008) Land Cover v2 database., , http://ionia1.esrin.esa.int/index.asp, European Space Agency, European Space Agency GlobCover Project, led by MEDIAS-France, accessed June 2013; Hansen, M., DeFries, …				Cambridge University Press						9781316178904; 9781107100374			English	Water Ecosystem Services: A Global Perspective	Book Chapter	Final
Martin-Ortega J., Ferrier R.C., Gordon I.J.	26648830100;7006540697;57205697885;	Water ecosystem services: Moving forward	Exclude	-	2015	Water Ecosystem Services: A Global Perspective				170	173		4	10.1017/CBO9781316178904.021	https://www.scopus.com/inward/record.uri?eid=2-s2.0-85011325667&doi=10.1017%2fCBO9781316178904.021&partnerID=40&md5=85048729b6226bbdcd26cf791391e5fd	Social, Economic and Geographical Sciences Group, The James Hutton Institute, Craigiebuckler, Aberdeen, AB15 8QH, United Kingdom; The James Hutton Institute, Invergowrie, Dundee, DD2 5DA, United Kingdom	Martin-Ortega, J., Social, Economic and Geographical Sciences Group, The James Hutton Institute, Craigiebuckler, Aberdeen, AB15 8QH, United Kingdom; Ferrier, R.C., Social, Economic and Geographical Sciences Group, The James Hutton Institute, Craigiebuckler, Aberdeen, AB15 8QH, United Kingdom; Gordon, I.J., The James Hutton Institute, Invergowrie, Dundee, DD2 5DA, United Kingdom	Understanding water ecosystem services requires both an elucidation of the interrelationships between hydrology, landscapes and ecology, and a contextualization of how water influences human livelihoods and wellbeing and how ecosystems themselves are affected by human activities. Ecosystem services-based approaches, as defined in this book, aim to understand these complex relationships to support…														Corbera, E., Pascual, U., Ecosystem services: Heed social goals (2012) Science, 335 (10), pp. 355-356; Ferrier, R.C., Jenkins, A., (2010) Handbook of Catchment Management., , Wiley: Chichester; Gomez-Baggethun, E., De Groot, R.S., Lomas, P.L., The history of ecosystem services in economic theory and practice: From early notions to markets and payment schemes (2010) Ecological Economics, 69 (6), p…				Cambridge University Press						9781316178904; 9781107100374			English	Water Ecosystem Services: A Global Perspective	Book Chapter	Final
Villa F., Portela R., Onofri L., Nunes P.A.L.D., Lange G.-M.	7005590794;6701656358;8580621700;7006823069;7103293982;	Assessing biophysical and economic dimensions of societal value: An example for water ecosystem services in Madagascar	Exclude	-	2015	Water Ecosystem Services: A Global Perspective				110	118		3	10.1017/CBO9781316178904.014	https://www.scopus.com/inward/record.uri?eid=2-s2.0-85011410581&doi=10.1017%2fCBO9781316178904.014&partnerID=40&md5=e200cec9c610d512c78defe6d89d6ba4	Basque Centre for Climate Change (BC3), IKERBASQUE, Basque Foundation for Science, Alameda Urquijo 4-4, Bilbao, 48008, Spain; Conservation International, 2011 Crystal Drive 500, Arlington, VA, United States; Department of Economics, University Cà Foscari of Venice, Dorsoduro 3246, Venezia, 30123, Italy; Department of Agricultural and Resource Economics, University of Padova, Via 8 Febbraio 1848, …	Villa, F., Basque Centre for Climate Change (BC3), IKERBASQUE, Basque Foundation for Science, Alameda Urquijo 4-4, Bilbao, 48008, Spain; Portela, R., Conservation International, 2011 Crystal Drive 500, Arlington, VA, United States; Onofri, L., Department of Economics, University Cà Foscari of Venice, Dorsoduro 3246, Venezia, 30123, Italy; Nunes, P.A.L.D., Department of Agricultural and Resource E…	13.1 INTRODUCTION Policy decisions are often based on an assessment of value. However, the definition of value is highly context-dependent and policy decisions are ultimately a multiple-objectives problem, containing internal trade-offs that make alternative actions difficult to assess and rank. This chapter provides a demonstration of how to operationalize an ecosystem services-based approach, a…														Bagstad, K., Villa, F., Johnson, G.W., Voigt, B., (2011) ARIES: ARtificial Intelligence for Ecosystem Services: A guide to models and data., , ARIES report series 122; Bagstad, K.J., Johnson, G.W., Voigt, B., Villa, F., Spatial dynamics of ecosystem service flows: A comprehensive approach to quantifying actual services (2013) Ecosystem Services, 4, pp. 117-125; Bagstad, K.J., Villa, F., Batker, D…				Cambridge University Press						9781316178904; 9781107100374			English	Water Ecosystem Services: A Global Perspective	Book Chapter	Final
Jiao W.-J., Min Q.-W., Li W.-H., Fuller A.M.	35797100300;7004057935;7501790057;57213484401;	Measuring water ecological carrying capacity with the ecosystem-service-based ecological footprint (ESEF) method: Theory, models and application	Exclude	-	2015	Chinese Journal of Applied Ecology	26	4		1041	1048		3		https://www.scopus.com/inward/record.uri?eid=2-s2.0-84929630293&partnerID=40&md5=554266d17320973ee711b209a6f74911	Institute of Geographic Sciences and Natural Resources Research, Chinese Academy of Sciences, Beijing, 100101, China	Jiao, W.-J., Institute of Geographic Sciences and Natural Resources Research, Chinese Academy of Sciences, Beijing, 100101, China; Min, Q.-W., Institute of Geographic Sciences and Natural Resources Research, Chinese Academy of Sciences, Beijing, 100101, China; Li, W.-H., Institute of Geographic Sciences and Natural Resources Research, Chinese Academy of Sciences, Beijing, 100101, China; Fuller, A…	Integrated watershed management based on aquatic ecosystems has been increasingly acknowledged. Such a change in the philosophy of water environment management requires recognizing the carrying capacity of aquatic ecosystems for human society from a more general perspective. The concept of the water ecological carrying capacity is therefore put forward, which considers both water resources and wa…	Ecosystem-service-based ecological footprint (ESEF); Taihu Lake Basin; Water ecological carrying capacity; Water ecological footprint	aquatic ecosystem; carrying capacity; ecosystem health; ecosystem service; land management; watershed; China; Taihu Lake; water; China; city; ecology; ecosystem; environmental protection; lake; theoretical model; water supply; China; Cities; Conservation of Natural Resources; Ecology; Ecosystem; Lakes; Models, Theoretical; Water; Water Resources; Water Supply		water, 7732-18-5; Water										Vitousek, P.M., Mooney, H.A., Lubchenco, J., Human domination of Earth's ecosystems (1997) Science, 277, pp. 494-499; Meybeck, M., Global analysis of river systems: From earth system controls to Anthropocene syndromes (2003) Philosophical Transactions of the Royal Society B: Biological Sciences, 358, pp. 1935-1955; Council, N.R., (2001) Assessing the TMDL Approach to Water Quality Management, , W…	Min, Q.-W.; Institute of Geographic Sciences and Natural Resources Research, Chinese Academy of SciencesChina			Editorial Board of Chinese Journal of Applied Ecology					10019332			26259444	Chinese	Chin. J. Appl. Ecol.	Article	Final
Turner S.J.	56298920900;	The interface between human rights and ecosystem services	Exclude	-	2015	Water Ecosystem Services: A Global Perspective				163	169		2	10.1017/CBO9781316178904.020	https://www.scopus.com/inward/record.uri?eid=2-s2.0-85011340541&doi=10.1017%2fCBO9781316178904.020&partnerID=40&md5=e39f6732f6cab5f77751f47c31ed8c85	Lincoln Law School, Lincoln University, Brayford Wharf, Lincoln, LN5 7AT, United Kingdom	Turner, S.J., Lincoln Law School, Lincoln University, Brayford Wharf, Lincoln, LN5 7AT, United Kingdom	19.1 INTRODUCTION Ecosystem services and human rights are usually discussed separately. The development of theory and practice in the field of ecosystem services has generally been the domain of ecologists, economists, and policy makers; lawyers have also engaged in the dialogue and development, but to a lesser extent (Mertens et al. 2012, p.31). The purpose of this chapter is to play a part in t…														Achterman, G.L., Mauger, R., The state and regional role in developing ecosystem service markets (2010) Duke Environmental Law and Policy Forum, 20, pp. 291-337; Anton, D.K., Shelton, D.L., (2011) Environmental Protection and Human Rights., , Cambridge University Press, Cambridge; Barbier, E.B., Wealth accounting, ecological capital and ecosystem services (2013) Environmental & Development Econom…	Turner, S.J.; Lincoln Law School, United Kingdom			Cambridge University Press						9781316178904; 9781107100374			English	Water Ecosystem Services: A Global Perspective	Book Chapter	Final
Corral-Verdugo V., Frías-Armenta M., Tapia-Fonllem C., Fraijo-Sing B.	55989642100;6603072717;56002695700;56000896800;	The psychological dimension of water ecosystem services	Exclude	-	2015	Water Ecosystem Services: A Global Perspective				156	162		1	10.1017/CBO9781316178904.019	https://www.scopus.com/inward/record.uri?eid=2-s2.0-85011371475&doi=10.1017%2fCBO9781316178904.019&partnerID=40&md5=b0fc9bcd3f3679b6322352db4ebd1880	Department of Psychology, University of Sonora, Luis Encinas y Rosales S/N, Hermosillo, Sonora 83000, Mexico	Corral-Verdugo, V., Department of Psychology, University of Sonora, Luis Encinas y Rosales S/N, Hermosillo, Sonora 83000, Mexico; Frías-Armenta, M., Department of Psychology, University of Sonora, Luis Encinas y Rosales S/N, Hermosillo, Sonora 83000, Mexico; Tapia-Fonllem, C., Department of Psychology, University of Sonora, Luis Encinas y Rosales S/N, Hermosillo, Sonora 83000, Mexico; Fraijo-Sing…	18.1 INTRODUCTION Discussions of ecosystem services and ecosystem services-based approaches have so far focused on their ecological, social, and economic aspects (Fisher et al. 2011). These are aspects of our common guiding core elements 2 and 3 as presented in Chapter 2 of this book. Core element 4 has also been dominated by economic and monetary quantification of benefits, including the environ…														Bechtel, R.B., Corral-Verdugo, V., Happiness and sustainable behavior (2010) Psychological Approaches to Sustainability, , V. Corral-Verdugo, C. García, & M. Frías (eds), Nova Science Publishers, New York; Brady, E., Aesthetics in practice: Valuing the natural world (2006) Environmental Values, 15, pp. 277-291; Brown, K.W., Kasser, T., Are psychological and ecological wellbeing compatible? The ro…				Cambridge University Press						9781316178904; 9781107100374			English	Water Ecosystem Services: A Global Perspective	Book Chapter	Final
Houdet J., Johnstone A., Germaneau C.	25651388600;56406120300;57188384300;	Ecosystem services-based approaches to water management: What opportunities and challenges for business?	Exclude	-	2015	Water Ecosystem Services: A Global Perspective				129	137		1	10.1017/CBO9781316178904.016	https://www.scopus.com/inward/record.uri?eid=2-s2.0-85011332609&doi=10.1017%2fCBO9781316178904.016&partnerID=40&md5=076c5f157d66d40bee54e12e9f0bfa5f	African Center for Technical Studies (ACTS), Kenya; Synergiz, Johannesburg, South Africa; Groundwater Consulting Services - GCS (Pty) Ltd, Johannesburg, South Africa; Synergiz, Paris, France	Houdet, J., African Center for Technical Studies (ACTS), Kenya, Synergiz, Johannesburg, South Africa; Johnstone, A., Groundwater Consulting Services - GCS (Pty) Ltd, Johannesburg, South Africa; Germaneau, C., Synergiz, Paris, France	15.1 INTRODUCTION Water sourcing, use, and discharge management have become critical issues to numerous business activities throughout the world. For instance, securing water supply is critical to farming and food production (e.g. World Water Assessment Programme 2014), while increasing water use and pollution are starting to generate severe operational, investment, and reputational risks for the…														Billé, R., Laurans, Y., Mermet, L., Pirard, R., Rankovic, A., (2012) Valuation without action? On the use of economic valuations of ecosystem services., , Policy Briefs N_07/2012. IDDRI; Bizikova, L., Dimple, R., Venema, H., (2014) The Water-Energy-Food Nexus and Agricultural Investment: A Sustainable Development Guidebook., , IISD, Canada; (2010) A CSIR perspective on water in South Africa., , C…				Cambridge University Press						9781316178904; 9781107100374			English	Water Ecosystem Services: A Global Perspective	Book Chapter	Final
Yang L., Fu C.	57198988757;36838234700;	Evaluation of water resources ecological service function based on agricultural food perspective	Exclude	-	2015	Advance Journal of Food Science and Technology	8	7		518	524			10.19026/ajfst.8.1558	https://www.scopus.com/inward/record.uri?eid=2-s2.0-84936935374&doi=10.19026%2fajfst.8.1558&partnerID=40&md5=85a3b4df26fddd18c9c601b4cfadb2da	Department of Mathematics, Nanchang University, Nanchang, Jiangxi, 330031, China; Center for Central China Economic Development Research, Nanchang University, Nanchang, Jiangxi, 330031, China	Yang, L., Department of Mathematics, Nanchang University, Nanchang, Jiangxi, 330031, China; Fu, C., Center for Central China Economic Development Research, Nanchang University, Nanchang, Jiangxi, 330031, China	Water resource is the material basis of human survival that closely linked with human living and production activities and is one of the most important factor restricting the natural environment, human survival and development. In this study, we aim to explore water ecosystem service function by set up the evaluation index system, which is based on the principle of evaluation index selection and …	Agricultural food; Ecological service function; Factor analysis; Water resources	Agriculture; Ecology; Ecosystems; Factor analysis; Function evaluation; Hydrogeology; Multivariant analysis; Agricultural foods; Ecological functions; Ecological services; Evaluation index system; Factor analysis method; Natural environments; Policy suggestions; Production activity; Water resources												Camille, B., Houeto, P., Ecological risk assessment of the presence of pharmaceutical residues in a French national water survey (2014) Regulatory Toxicol. Pharmacol., 69, pp. 296-303; Crystele, L., Duvail, S., Floods and livelihoods: The impact of changing water resources on wetland agro-ecological production systems in the Tana River Delta, Kenya (2013) Global Environ. Change, 23, pp. 252-263; …	Fu, C.; Center for Central China Economic Development Research, China			Maxwell Science Publications					20424868				English	Adv. J. Food Sci. Technol.	Article	Final	All Open Access, Hybrid Gold, Green
Grizzetti B., Lanzanova D., Liquete C., Reynaud A., Cardoso A.C.	55918935000;56801109000;9042377200;7006748061;57203257049;	Assessing water ecosystem services for water resource management	Include	no	2016	Environmental Science and Policy	61			194	203		185	10.1016/j.envsci.2016.04.008	https://www.scopus.com/inward/record.uri?eid=2-s2.0-84989233976&doi=10.1016%2fj.envsci.2016.04.008&partnerID=40&md5=e17e31ce1bc467d43bfe53380b245ac5	European Commission Joint Research Centre (JRC)I-21027 (VA), Italy	Grizzetti, B., European Commission Joint Research Centre (JRC)I-21027 (VA), Italy; Lanzanova, D., European Commission Joint Research Centre (JRC)I-21027 (VA), Italy; Liquete, C., European Commission Joint Research Centre (JRC)I-21027 (VA), Italy; Reynaud, A., European Commission Joint Research Centre (JRC)I-21027 (VA), Italy; Cardoso, A.C., European Commission Joint Research Centre (JRC)I-21027 (…	Ecosystem service concepts can offer a valuable approach for linking human and nature, and arguments for the conservation and restoration of natural ecosystems. Despite an increasing interest in the topic, the application of these concepts for water resource management has been hampered by the lack of practical definitions and methodologies. In this study we review and analyse the current literat…	Ecosystem services indicators; Ecosystem services valuation; Water ecosystem services; Water Framework Directive						Seventh Framework Programme, FP7: 603378	This study has been funded by the EU FP7 project MARS (Managing Aquatic ecosystems and water Resources under multiples Stress; project number 603378 ). The authors would like to thank all the MARS partners for their feedback to the methodology .						Bagstad, K.J., Semmens, D.J., Waage, S., Winthrop, R., A comparative assessment of decision-support tools for ecosystem services quantification and valuation (2013) Ecosyst. Serv., 5, pp. e27-e39; Bateman, I.J., Langford, I.H., Non-users' willingness to pay for a National Park: an application and critique of the contingent valuation method (1997) Reg. Stud., 31, pp. 571-582; Bateman, I.J., Day, B…	Grizzetti, B.; European Commission Joint Research Centre (JRC)Italy; email: bruna.grizzetti@jrc.ec.europa.eu			Elsevier Ltd					14629011		ESCPF		English	Environ. Sci. Policy	Article	Final	All Open Access, Hybrid Gold, Green
Keys P.W., Wang-Erlandsson L., Gordon L.J.	7003431332;56035883000;7202829709;	Revealing invisible Water: Moisture recycling as an ecosystem service	Exclude	-	2016	PLoS ONE	11	3	e0151993				50	10.1371/journal.pone.0151993	https://www.scopus.com/inward/record.uri?eid=2-s2.0-84962176543&doi=10.1371%2fjournal.pone.0151993&partnerID=40&md5=e9c2323cb2eb7db69218b4cecd656501	Stockholm Resilience Centre, Stockholm University, Stockholm, Sweden; Department of Atmospheric Science, Colorado State University, Fort Collin, United States; Department of Water Management, Faculty of Civil Engineering and Geosciences, Delft University of Technology, Delft, Netherlands	Keys, P.W., Stockholm Resilience Centre, Stockholm University, Stockholm, Sweden, Department of Atmospheric Science, Colorado State University, Fort Collin, United States; Wang-Erlandsson, L., Stockholm Resilience Centre, Stockholm University, Stockholm, Sweden, Department of Water Management, Faculty of Civil Engineering and Geosciences, Delft University of Technology, Delft, Netherlands; Gordon…	An ecosystem service is a benefit derived by humanity that can be traced back to an ecological process. Although ecosystem services related to surface water have been thoroughly described, the relationship between atmospheric water and ecosystem services has been mostly neglected, and perhaps misunderstood. Recent advances in land-atmosphere modeling have revealed the importance of terrestrial ec…		agricultural land; Article; Brazil; environmental management; environmental sustainability; evaporation; geographic distribution; mathematical model; moisture; North America; precipitation; recycling; resource management; Russian Federation; semiarid climate; validation process; vegetation; water management; ecosystem; geography; humidity; plant; water; Brazil; Ecosystem; Geography; Humidity; Pla…		water, 7732-18-5; Water			Colorado State University, CSU; Svenska Forskningsrådet Formas: 1364115	The research for this was supported by The Swedish Research Council Formas, under grant number 1364115. Auxiliary support was provided by Scott Denning and the BioCycle Group at Colorado State University. The funders had no role in study design, data collection and analysis, decision to publish, or preparation of the manuscript.						Daily, G.C., (1997) Nature's Services: Societal Dependence on Natural Ecosystems, , Island Press; Falkenmark, M., Finlayson, M., Gordon, L., Agriculture, water, and ecosystems: Avoiding the costs of going too far (2007) Water for Food-Water for Life: A Comprehensive Assessment of Water Management in Agriculture, pp. 233-277. , Molden D, editor. 1st ed. Colombo, Sri Lanka: Earthscan; Brauman, K.A.…				Public Library of Science					19326203		POLNC	26998832	English	PLoS ONE	Article	Final	All Open Access, Gold, Green
Kharrazi A., Akiyama T., Yu Y., Li J.	55618270300;56678004900;56143801400;55266770700;	Evaluating the evolution of the Heihe River basin using the ecological network analysis: Efficiency, resilience, and implications for water resource management policy	Exclude	-	2016	Science of the Total Environment	572			688	696		43	10.1016/j.scitotenv.2016.06.210	https://www.scopus.com/inward/record.uri?eid=2-s2.0-84994056255&doi=10.1016%2fj.scitotenv.2016.06.210&partnerID=40&md5=78f0079d21888d6b7f5ca498a206cbcf	Advanced Systems Analysis Program, International Institute for Applied Systems Analysis (IIASA), Laxenburg, Austria; Graduate School of Public Policy, The University of Tokyo, Japan; Graduate Program in Sustainability Science–Global Leadership Initiative, Graduate School of Frontier Sciences, The University of Tokyo, Japan; School of Business, East China University of Science and Technology, Shan…	Kharrazi, A., Advanced Systems Analysis Program, International Institute for Applied Systems Analysis (IIASA), Laxenburg, Austria, Graduate School of Public Policy, The University of Tokyo, Japan; Akiyama, T., Graduate Program in Sustainability Science–Global Leadership Initiative, Graduate School of Frontier Sciences, The University of Tokyo, Japan; Yu, Y., School of Business, East China Univers…	One of the most critical challenges in the anthropocentric age is the sustainable management of the planet's increasingly strained water resources. In this avenue, there is a need to advance holistic approaches and objective tools which allow policy makers to better evaluate system-level properties and trade-offs of water resources. This research contributes to the expanding literature in this ar…	Ecological network analysis; Heihe River basin; Resilience; Sustainability; Water resource management	Commerce; Ecology; Economic and social effects; Ecosystems; Efficiency; Groundwater; Hydrogeology; Natural resources management; Redundancy; Resource allocation; Rivers; Sustainable development; Water management; Water recycling; Watersheds; Critical challenges; Ecological network analysis; Groundwater bodies; Heihe river basin; Network configuration; Resilience; Sustainable management; Waterreso…												Akiyama, T., Li, J., Kubota, J., Konagaya, Y., Watanabe, M., Perspectives on sustainability assessment: an integral approach to historical changes in social systems and water environment in the Ili River basin of central Eurasia, 1900–2008 (2012) World Futures, 68 (8), pp. 595-627; Bodini, A., Bondavalli, C., Allesina, S., Cities as ecosystems: growth, development and implications for sustainabil…	Kharrazi, A.; Advanced Systems Analysis Program, Austria; email: ali@pp.u-tokyo.ac.jp			Elsevier B.V.					489697		STEVA		English	Sci. Total Environ.	Article	Final
Dennedy-Frank P.J., Muenich R.L., Chaubey I., Ziv G.	56662120200;57188864216;57203258574;56348216800;	Comparing two tools for ecosystem service assessments regarding water resources decisions	Exclude	-	2016	Journal of Environmental Management	177			331	340		40	10.1016/j.jenvman.2016.03.012	https://www.scopus.com/inward/record.uri?eid=2-s2.0-84963954625&doi=10.1016%2fj.jenvman.2016.03.012&partnerID=40&md5=d20d7b65c0e18c316090a357c822b3aa	Stanford University, Department of Earth System Science, Yang and Yamazaki (Y2E2) Building, 473 Via Ortega, Stanford, CA 94305-4216, United States; Department of Agricultural and Biological Engineering, Purdue University, 225 South University St., West Lafayette, IN 47907, United States; Waterleeds and School of Geography, University of Leeds, Leeds, LS2 9JT, United Kingdom	Dennedy-Frank, P.J., Stanford University, Department of Earth System Science, Yang and Yamazaki (Y2E2) Building, 473 Via Ortega, Stanford, CA 94305-4216, United States; Muenich, R.L., Department of Agricultural and Biological Engineering, Purdue University, 225 South University St., West Lafayette, IN 47907, United States; Chaubey, I., Department of Agricultural and Biological Engineering, Purdue…	We present a comparison of two ecohydrologic models commonly used for planning land management to assess the production of hydrologic ecosystem services: the Soil and Water Assessment Tool (SWAT) and the Integrated Valuation of Ecosystem Services and Tradeoffs (InVEST) annual water yield model. We compare these two models at two distinct sites in the US: the Wildcat Creek Watershed in Indiana and…	Ecosystem services; InVEST; Model comparison; SWAT; Water yield	drinking water; soil; baseflow; decision making; ecosystem service; environmental assessment; estimation method; hydrological modeling; land management; resource management; spatial distribution; tool use; water planning; water resource; water storage; water supply; water yield; Article; ecosystem; environmental management; environmental planning; irrigation (agriculture); land use; water supply;…		Drinking Water; Soil			National Science Foundation, NSF; Stanford University, SU	The authors would like to thank Stanford University's Department of Earth System Science and the NSF Graduate Research Fellowship Program for financial support. In addition, the authors would like to thank Steve Gorelick and Yonas Ghile for their thoughtful comments through the early stages of this work, and helpful comments from the editor and reviewer.						Abbaspour, K.C., Yang, J., Maximov, I., Siber, R., Bogner, K., Mieleitner, J., Zobrist, J., Srinivasan, R., Modelling hydrology and water quality in the pre-alpine/alpine Thur watershed using SWAT (2007) J. Hydrol., 333 (2-4), pp. 413-430; Arnold, J.G., Srinivasan, R., Muttiah, R.S., Williams, J.R., Large area hydrologic modeling and assessment part I: model development1 (1998) JAWRA J. Am. Water…	Dennedy-Frank, P.J.; Stanford University, Yang and Yamazaki (Y2E2) Building, 473 Via Ortega, United States; email: pjdf@stanford.edu			Academic Press					3014797		JEVMA	27111651	English	J. Environ. Manage.	Article	Final	All Open Access, Bronze, Green
Pappalardo S.E., Otto S., Gasparini V., Zanin G., Borin M.	56044480500;7101616399;56126923900;57200170726;7006314141;	Mitigation of herbicide runoff as an ecosystem service from a constructed surface flow wetland	Exclude	-	2016	Hydrobiologia	774	1		193	202		22	10.1007/s10750-015-2375-1	https://www.scopus.com/inward/record.uri?eid=2-s2.0-84938153375&doi=10.1007%2fs10750-015-2375-1&partnerID=40&md5=91657e4434afa07633cb24f68aac7243	Department of Agronomy, Food, Natural Resources, Animals and Environment (DAFNAE), University of Padova, Agripolis, Viale dell’Università 16, Legnaro, PD 35020, Italy; Institute of Agro-environmental and Forest Biology - CNR, Agripolis, Viale dell’Università 16, Legnaro, PD 35020, Italy	Pappalardo, S.E., Department of Agronomy, Food, Natural Resources, Animals and Environment (DAFNAE), University of Padova, Agripolis, Viale dell’Università 16, Legnaro, PD 35020, Italy; Otto, S., Institute of Agro-environmental and Forest Biology - CNR, Agripolis, Viale dell’Università 16, Legnaro, PD 35020, Italy; Gasparini, V., Department of Agronomy, Food, Natural Resources, Animals and Enviro…	Ecosystem services provided by wetland systems presently play a pivotal role in intensive cropland as water purification from agricultural pollution. A field trial was conducted in 2014 to evaluate herbicide runoff reduction and retention using a 0.32 ha constructed surface flow wetland (CSFW) at the outlet of a 6 ha agricultural basin. To simulate an extreme pulse contamination, the CSFW was flo…	Artificial wetlands; Ecosystem services; Metolachlor; Sustainable agriculture; Terbuthylazine; Water purification	agricultural production; alternative agriculture; concentration (composition); constructed wetland; ecosystem service; flooding; metolachlor; pollutant removal; purification; runoff; terbuthylazine; water treatment												Anderson, B.S., Phillips, B.M., Hunt, J.W., Largay, B., Shihadeh, R., Tjeerdema, R.S., Pesticide and toxicity reduction using an integrated vegetated treatment system (2011) Environmental Toxicology and Chemistry, 30, pp. 1036-1043; Berghahn, R., Mohr, S., Hübner, V., Schmiediche, R., Schmiedling, I., Svetich-Will, E., Schmidt, R., Effects of repeated insecticide pulses on macroinvertebrate drift…	Pappalardo, S.E.; Department of Agronomy, Agripolis, Viale dell’Università 16, Italy; email: salvatore.pappalardo@unipd.it			Springer International Publishing					188158		HYDRB		English	Hydrobiologia	Article	Final
Chen D., Jin G., Zhang Q., Arowolo A.O., Li Y.	57221136686;56508827600;57189233686;56439978200;57192524660;	Water ecological function zoning in Heihe River Basin, Northwest China	Exclude	-	2016	Physics and Chemistry of the Earth	96			74	83		17	10.1016/j.pce.2016.08.005	https://www.scopus.com/inward/record.uri?eid=2-s2.0-84994709857&doi=10.1016%2fj.pce.2016.08.005&partnerID=40&md5=a4ef469e587a78bb6b8135b2fc10bd2a	Faculty of Resources and Environmental Science, Hubei University, Wuhan, Hubei 430062, China; Institute of Geographic Sciences and Natural Resources Research, Chinese Academy of Sciences, Beijing, 100101, China; Center for Chinese Agricultural Policy, Chinese Academy of Sciences, Beijing, 100101, China; Department of Agricultural Economics and Farm Management, Federal University of Agriculture, P…	Chen, D., Faculty of Resources and Environmental Science, Hubei University, Wuhan, Hubei 430062, China; Jin, G., Faculty of Resources and Environmental Science, Hubei University, Wuhan, Hubei 430062, China, Institute of Geographic Sciences and Natural Resources Research, Chinese Academy of Sciences, Beijing, 100101, China, Center for Chinese Agricultural Policy, Chinese Academy of Sciences, Beiji…	Rapid urbanization coupled with increase in population growth rate in recent years has accelerated economic pressure on the ecological environment leading to a gradual deterioration of global and regional environment. This has particularly resulted into water contamination and shortage of water resources thus posing a great threat to human survival. How to guaranteeing sustainable use of basin wa…	Functional zoning; Heihe River Basin; Spatial clustering; Water ecological function	Clustering algorithms; Deterioration; Ecology; Ecosystems; Hydrogeology; Population statistics; Principal component analysis; Rivers; Soil conservation; Water pollution; Water resources; Water supply systems; Watersheds; Zoning; Ecological characteristics; Ecological environments; Ecological functions; Functional zoning; Heihe river basin; K-means clustering method; Principal components analysis;…					71225005; National Natural Science Foundation of China, NSFC: 41501593, 91325302	This research was supported by the major research plan of the National Natural Science Foundation of China (Grant No. 91325302 ; 41501593 ), the National Natural Science Funds of China for Distinguished Young Scholars (Grant No. 71225005 ).						Bryce, S.A., Clarke, S.E., Landscape-level ecological regions: linking state-level ecoregion frameworks with stream habitat classifications (1996) Environ. Manag., 20, pp. 297-311; Chen, J., Yue, Z., Ground characterization using breaking-action-based zoning analysis of rotary-percussive instrumented drilling (2015) Int. J. Rock. Mech. Min., 75, pp. 33-43; Crowley, J.M., Biogeography (1967) Can. …	Jin, G.; Faculty of Resources and Environmental Science, China; email: jing_simlab@163.com			Elsevier Ltd					14747065		PCEHA		English	Phys. Chem. Earth	Article	Final
Harrison-Atlas D., Theobald D.M., Goldstein J.H.	57076988000;7003695168;14028269100;	A systematic review of approaches to quantify hydrologic ecosystem services to inform decision-making	Exclude	-	2016	International Journal of Biodiversity Science, Ecosystem Services and Management	12	3		160	171		11	10.1080/21513732.2016.1181105	https://www.scopus.com/inward/record.uri?eid=2-s2.0-84978198563&doi=10.1080%2f21513732.2016.1181105&partnerID=40&md5=594cd5fe47581ae945b75c56cbe4f99a	Graduate Degree Program in Ecology, Colorado State University, Fort Collins, CO, United States; Department of Fish, Wildlife, and Conservation Biology, Colorado State University, Fort Collins, CO, United States; Conservation Science Partners, Inc, Fort Collins, CO, United States; Department of Human Dimensions of Natural Resources, Colorado State University, Fort Collins, CO, United States; Offic…	Harrison-Atlas, D., Graduate Degree Program in Ecology, Colorado State University, Fort Collins, CO, United States, Department of Fish, Wildlife, and Conservation Biology, Colorado State University, Fort Collins, CO, United States; Theobald, D.M., Graduate Degree Program in Ecology, Colorado State University, Fort Collins, CO, United States, Department of Fish, Wildlife, and Conservation Biology,…	Global threats to freshwater resources are prompting widespread concern about their management and implications for well-being. In recent decades, hydrologic ecosystem services (HES) have emerged as an innovative concept to evaluate freshwater resources, providing opportunity for researchers to engage in decision-relevant science. We conducted a systematic review of studies published within the l…	decision-making; Ecosystem services; hydrologic ecosystem services; mapping; validation; water resources	decision making; ecosystem service; farming system; hydrology; knowledge; management practice; mapping; model validation; water management; water planning; water resource					Colorado State University, CSU: 0966346	This work was supported by the National Science Foundation?s I-WATER IGERT program hosted by Colorado State University [grant number 0966346].						Aghakouchak, A., Habib, E., Application of a conceptual hydrologic model in teaching hydrologic processes (2010) Int J Eng Educ, 26, pp. 1-11; Allen, W.L., III, Advancing green infrastructure at all scales: from landscape to site (2012) Environ Pract, 14, pp. 17-25; Arias, M.E., Cochrane, T.A., Lawrence, K.S., Killeen, T.J., Farrell, T.A., Paying the forest for electricity: a modelling framework …	Harrison-Atlas, D.; Graduate Degree Program in Ecology, United States; email: dha@colostate.edu			Taylor and Francis Ltd.					21513732				English	Int. J. Biodiversity Sci. Ecosyst. serv. Manage.	Review	Final	All Open Access, Gold
Anibas C., Kukral J., Possemiers M., Huysmans M.	25640520800;57192819377;55357959000;10339393000;	Assessment of Seasonal Aquifer Thermal Energy Storage as a Groundwater Ecosystem Service for the Brussels-Capital Region: Combining Groundwater Flow, and Heat and Reactive Transport Modeling	Include	no	2016	Energy Procedia	97			179	185		6	10.1016/j.egypro.2016.10.048	https://www.scopus.com/inward/record.uri?eid=2-s2.0-85008262925&doi=10.1016%2fj.egypro.2016.10.048&partnerID=40&md5=ce557c9abeb7b2af60013eeaa5e7ec4c	Vrije Universiteit Brussel (VUB), Department of Hydrology and Hydraulic Engineering, Pleinlaan 2, Elsene, 1050, Belgium; AGT Nv., Kontichsesteenweg 38, Aartselaar, 2630, Belgium; KU Leuven, Department of Earth and Environmental Sciences, Celestijnenlaan 200E, Leuven, 3001, Belgium	Anibas, C., Vrije Universiteit Brussel (VUB), Department of Hydrology and Hydraulic Engineering, Pleinlaan 2, Elsene, 1050, Belgium; Kukral, J., Vrije Universiteit Brussel (VUB), Department of Hydrology and Hydraulic Engineering, Pleinlaan 2, Elsene, 1050, Belgium; Possemiers, M., AGT Nv., Kontichsesteenweg 38, Aartselaar, 2630, Belgium; Huysmans, M., Vrije Universiteit Brussel (VUB), Department …	Seasonal aquifer thermal energy storage and recovery (ATES) help urbanized areas to contribute to their energy demands. We assess the potential of ATES in the Brussels-Capital Region, Belgium with groundwater flow, heat and reactive transport models. Situated in the phreatic Brussels Sand aquifer, they indicate that ATES systems are unfeasible for hydraulic conductivities of 4.2e-6 ms-1. At low g…	ATES; Belgium; groundwater modeling; heat transport; reactive transport	Aquifers; Ecosystems; Energy storage; Groundwater; Groundwater flow; Heat storage; Hydraulic conductivity; Hydrogeology; Thermal energy; ATES; Belgium; Groundwater modeling; Heat transport; Reactive transport; Groundwater resources												Vienken, T., Schelenz, S., Rink, K., Dietrich, P., Sustainable Intensive Thermal Use of the Shallow Subsurface-A Critical View on the Status Quo (2015) Groundwater, 53 (3), pp. 356-361; Bonte, M., Stuyfzand, P.J., Hulsmann, A., Van Beelen, P., Underground thermal energy storage: Environmental risks and policy developments in the Netherlands and European Union (2011) Ecology and Society, 16 (1), p…	Anibas, C.; Vrije Universiteit Brussel (VUB), Pleinlaan 2, Belgium; email: canibas@vub.ac.be	Bruckman V.Kempka T.Ask M.Juhlin C.Kuhn M.		Elsevier Ltd	European Geosciences Union General Assembly 2016, EGU Division Energy, Resources and the Environment, ERE 2016	17 April 2016 through 22 April 2016		121640	18766102				English	Energy Procedia	Conference Paper	Final	All Open Access, Gold
Rendon O.R., Dallimer M., Paavola J.	56734413100;6603173368;7004107473;	Flow and rent-based opportunity costs of water ecosystem service provsion in a complex farming system	Exclude	-	2016	Ecology and Society	21	4	36				5	10.5751/ES-08787-210436	https://www.scopus.com/inward/record.uri?eid=2-s2.0-85008158275&doi=10.5751%2fES-08787-210436&partnerID=40&md5=de17548f8b6e90ebd07d887f5ce3e3b9	Sustainability Research Institute, School of Earth and Environment, University of Leeds, United Kingdom	Rendon, O.R., Sustainability Research Institute, School of Earth and Environment, University of Leeds, United Kingdom; Dallimer, M., Sustainability Research Institute, School of Earth and Environment, University of Leeds, United Kingdom; Paavola, J., Sustainability Research Institute, School of Earth and Environment, University of Leeds, United Kingdom	Unsustainable land uses present many challenges for securing ecosystem service provision. It is also difficult to estimate the cost of a transition to more sustainable land-management practices for individual landholders. The main cost to landholders is the opportunity costs, the income foregone when changing land use for continued or enhanced ecosystem service provision. Thus accurate estimation…	Coffee; Honduras; Land use; Opportunity costs; Payment distribution; Payment for ecosystem services; Tropical forest; Water quality	coffee; ecosystem service; farming system; land management; land use; management practice; service provision; tropical forest; water quality; water resource; Honduras; Bos												Adams, V.M., Pressey, R.L., Naidoo, R., Opportunity costs: Who really pays for conservation? (2010) Biological Conservation, 143 (2), pp. 439-448. , http://dx.doi.org/10.1016/j.biocon.2009.11.011; Agulla Menoni, J., (2012) Consultoria Internacional: misión De contribución a La precisión De Los Indicadores De Un Programa De Apoyo De La UE Al Sector Forestal En Honduras, , http://mosef.org.hn/wp-co…				Resilience Alliance					17083087				English	Ecol. Soc.	Article	Final	All Open Access, Gold, Green
Gjorup A.F., Cardoso Fidalgo E.C., Prado R.B., Schuler A.E.	57079242300;16174897000;56715169200;14063846800;	Analysis of selection procedures to determine priority areas for payment for water ecosystem services programs [Análise de procedimentos para seleção de áreas prioritárias em programas de pagamento por serviços ambientais hídricos]	Exclude	-	2016	Revista Ambiente e Agua	11	1		225	238		3	10.4136/ambi-agua.1782	https://www.scopus.com/inward/record.uri?eid=2-s2.0-84955560857&doi=10.4136%2fambi-agua.1782&partnerID=40&md5=2a640ccb809422fe8ba06073f737721c	Universidade Federal Fluminense (UFF), Niterói, RJ, Brazil; Empresa Brasileira de Pesquisas Agropecuárias (Embrapa solos), Departamento de Núcleo de Geomática (Ngeo), Rio de Janeiro, RJ, Brazil	Gjorup, A.F., Universidade Federal Fluminense (UFF), Niterói, RJ, Brazil; Cardoso Fidalgo, E.C., Empresa Brasileira de Pesquisas Agropecuárias (Embrapa solos), Departamento de Núcleo de Geomática (Ngeo), Rio de Janeiro, RJ, Brazil; Prado, R.B., Empresa Brasileira de Pesquisas Agropecuárias (Embrapa solos), Departamento de Núcleo de Geomática (Ngeo), Rio de Janeiro, RJ, Brazil; Schuler, A.E., Empr…	The approach of ecosystem services has shown promise for the evaluation of interactions between ecosystems and society, integrating environmental and socioeconomic concepts which require interdisciplinary knowledge. However, its usefulness in decision making is limited due to information gaps. This study was therefore developed in order to contribute to the application of principles of ecosystem …	Compensation for ecosystem services; Decision support; Ecosystem services; Water ecosystem services													(2012) Manual Operativo Do Programa Produtor De Água, p. 84. , Brasília; Bennett, G., Carroll, N., Hamilton, K., (2015) Charting New Waters: State of Watershed Payments, , http://www.ecosystemmarketplace.com/reports/sowp2012, Washington, DC: Forest Trends, 2012, Acesso em: 10 mar; Bernardes, A.C., Pagamento por serviços ambientais: Experiências brasileiras relacionadas à água (2010) Anais…Florian…	Gjorup, A.F.; Universidade Federal Fluminense (UFF)Brazil; email: ana_feital@hotmail.com			Institute for Environmental Research in Hydrographic Basins (IPABHi)					1980993X				Portuguese	Rev. Ambiente Agua	Article	Final	All Open Access, Gold, Green
Garg S.	57193948966;	Impact of Overpopulation on Land Use Pattern	Exclude	-	2016	Environmental Issues Surrounding Human Overpopulation				137	154		1	10.4018/978-1-5225-1683-5.ch008	https://www.scopus.com/inward/record.uri?eid=2-s2.0-85017640816&doi=10.4018%2f978-1-5225-1683-5.ch008&partnerID=40&md5=6cb9c376c3ae54d097fb1ae7d0ea571d	Kurukshetra University, Kurukshetra, India	Garg, S., Kurukshetra University, Kurukshetra, India	Overpopulation does not depend only on the size or density of the population, but on the ratio of population to available sustainable resources. It also depends on how resources are managed and distributed throughout the population. Overpopulation is one of the hazards and serious problem, which creates a great obstacle in the way of national development. It is estimated that growth in human popu…														(2007) U.S. Assistance Programs in the United States, the Federal Government first Assisted Agriculture; Aide, T.M., Grau, H.R., Globalization, migration, and Latin American ecosystems (2004) Science, 305 (5692), pp. 1915-1916. , PMID:15448256; Jacobson, B., (1987) The Future of Urbanization: Facing the Ecological and Economic Constraints, , Worldwatch Paper No. 77; (2004) Statistical Abstract of…	Garg, S.; Kurukshetra UniversityIndia			IGI Global						9781522516842; 9781522516835			English	Environ. Issues Surround. Hum. Overpopulation	Book Chapter	Final
McDonough K.R., Moore T., Hutchinson S.	56940250200;35099226300;7102838475;	Evaluating urban best management practices as a tool for the provision of hydrologic ecosystem services	Exclude	-	2016	2016 American Society of Agricultural and Biological Engineers Annual International Meeting, ASABE 2016							1	10.13031/aim.20162458242	https://www.scopus.com/inward/record.uri?eid=2-s2.0-85009067356&doi=10.13031%2faim.20162458242&partnerID=40&md5=12bc5eaeb583b9cc2966ad3e475d243d	129 Seaton Hall, Kansas State University, 920 N. 17th St., Manhattan, KS 66505-2906, United States	McDonough, K.R., 129 Seaton Hall, Kansas State University, 920 N. 17th St., Manhattan, KS 66505-2906, United States; Moore, T., 129 Seaton Hall, Kansas State University, 920 N. 17th St., Manhattan, KS 66505-2906, United States; Hutchinson, S., 129 Seaton Hall, Kansas State University, 920 N. 17th St., Manhattan, KS 66505-2906, United States	Increasing concerns about climate change has sparked research and discussion about the long-term, detrimental impacts of human activity on the environment. The benefits that humans obtain from ecosystems, known as ecosystem services, have changed more in the past fifty years than in any other comparable period in history. One of the largest challenges of this century will be to establish a balanc…	Best management practices; Ecosystem services; Hydrologic modeling; Urban watershed management	Climate change; Decision making; Ecology; Erosion; Land use; Soil conservation; Water; Water conservation; Water management; Watersheds; Best management practice (BMPs); Best management practices; Bioretention cell; Ecosystem services; Hydrologic modeling; Regulation services; Stormwater management model(SWMM); Urban watershed; Ecosystems												Ahiablame, L.M., Engel, B.A., Chaubey, I., Effectiveness of low impact development practices: Literature review and suggestions for future research (2012) Water Air Soil Pollution, 223, pp. 4253-4273; Bennett, E.M., Peterson, G.D., Gordon, L.J., Understanding relationships among multiple ecosystem services (2009) Ecology Letters, 12 (1394), p. 1404; Carpenter, S.R., Mooney, H.A., Agard, J., Capis…			ASABE	American Society of Agricultural and Biological Engineers	2016 ASABE Annual International Meeting	17 July 2016 through 20 July 2016		125285		9781510828759			English	Am. Soc. Agric. Biol. Eng. Annu. Int. Meet., ASABE	Conference Paper	Final
Richardson D.C., Melles S.J., Pilla R.M., Hetherington A.L., Knoll L.B., Williamson C.E., Kraemer B.M., Jackson J.R., Long E.C., Moore K., Rudstam L.G., Rusak J.A., Saros J.E., Sharma S., Strock K.E., Weathers K.C., Wigdahl-Perry C.R.	55574204234;25621642100;57021509200;7005436715;8596355100;7201705406;56697999400;55465585200;56246484800;23485833600;57203046209;6602883825;6603467170;7405881408;37056538200;7003465317;56955813900;	Transparency, geomorphology and mixing regime explain variability in trends in lake temperature and stratification across Northeastern North America (1975-2014)	Exclude	-	2017	Water (Switzerland)	9	6	442				46	10.3390/w9060442	https://www.scopus.com/inward/record.uri?eid=2-s2.0-85021250640&doi=10.3390%2fw9060442&partnerID=40&md5=ccaeff652c8294c86bcce3806e8adde7	Department of Biology, SUNY New Paltz, 1 Hawk Drive, New Paltz, NY 12561, United States; Department of Chemistry and Biology, Ryerson University, 350 Victoria Street, Toronto, ON M5B 2K3, Canada; Department of Biology, Miami University, 700 E High Street, Oxford, OH 45056, United States; Department of Biological Sciences, Virginia Polytechnic Institute and State University, 2011 Derring Hall, 926…	Richardson, D.C., Department of Biology, SUNY New Paltz, 1 Hawk Drive, New Paltz, NY 12561, United States; Melles, S.J., Department of Chemistry and Biology, Ryerson University, 350 Victoria Street, Toronto, ON M5B 2K3, Canada; Pilla, R.M., Department of Biology, Miami University, 700 E High Street, Oxford, OH 45056, United States; Hetherington, A.L., Department of Biological Sciences, Virginia P…	Lake surface water temperatures are warming worldwide, raising concerns about the future integrity of valuable lake ecosystem services. In contrast to surface water temperatures, we know far less about what is happening to water temperature beneath the surface, where most organisms live. Moreover, we know little about which characteristics make lakes more or less sensitive to climate change and o…	Climate change; Lakes as sentinels; Macrosystems; Temperature; Thermal stratification; Warming	Climate change; Ecology; Ecosystems; Mixing; Surface waters; Temperature; Thermal stratification; Transparency; Ecosystem services; Environmental stressors; Lake characteristics; Macrosystems; Near surface temperature; Surface water temperature; Warming; Water temperatures; Lakes; climate change; cooling; deep water; ecosystem service; environmental stress; geomorphology; lake ecosystem; lake wat…					0226747; National Science Foundation, NSF: 1137327, 1517823, EF-1137327, EF-1346856; U.S. Army Corps of Engineers, USACE; State University of New York, SUNY; National Park Service, NPS; Smith College; Fairfield University; Global Lake Ecological Observatory Network, GLEON; Natural Sciences and Engineering Research Council of Canada, NSERC	The Global Lake Ecological Observatory Network (GLEON) made this project possible, and the project was initiated at the GLEON 16 meeting in Jouvence, Qu?bec, Canada; support for analyses and travel were provided by GLEON and NSF EF-1137327 and EF-1346856. SJM was supported by a Natural Science and Engineering Research Council of Canada (NSERC) Discovery grant; RMP by Miami University College of A…						Messager, M.L., Lehner, B., Grill, G., Nedeva, I., Schmitt, O., Estimating the volume and age of water stored in global lakes using a geo-statistical approach (2016) Nat. Commun., 7, p. 13603; Abell, R., Thieme, M.L., Revenga, C., Bryer, M., Kottelat, M., Bogutskaya, N., Coad, B., Bussing, W., Freshwater ecoregions of the world: A new map of biogeographic units for freshwater biodiversity conserv…	Richardson, D.C.; Department of Biology, 1 Hawk Drive, United States; email: richardsond@newpaltz.edu			MDPI AG					20734441				English	Water	Article	Final	All Open Access, Gold, Green
Hackbart V.C.S., de Lima G.T.N.P., dos Santos R.F.	36473367800;57213402436;7102445218;	Theory and practice of water ecosystem services valuation: Where are we going?	Exclude	-	2017	Ecosystem Services	23			218	227		35	10.1016/j.ecoser.2016.12.010	https://www.scopus.com/inward/record.uri?eid=2-s2.0-85008233976&doi=10.1016%2fj.ecoser.2016.12.010&partnerID=40&md5=5374e48264b13d44b339485f5f3b742d	Department of Ecology, Bioscience Institute, University of São Paulo, Rua do Matão, 321, travessa 14, São Paulo, SP 05508-900, Brazil; Municipality of Campinas, Avenida Anchieta, 200, Campinas, SP CEP 13115-904, Brazil	Hackbart, V.C.S., Department of Ecology, Bioscience Institute, University of São Paulo, Rua do Matão, 321, travessa 14, São Paulo, SP 05508-900, Brazil; de Lima, G.T.N.P., Municipality of Campinas, Avenida Anchieta, 200, Campinas, SP CEP 13115-904, Brazil; dos Santos, R.F., Department of Ecology, Bioscience Institute, University of São Paulo, Rua do Matão, 321, travessa 14, São Paulo, SP 05508-90…	Water resources have been widely cited as a prime example of ecosystem services (ES), especially when the issue is valuation. Because of the importance of water ecosystem services (ESw), they are being effectively evaluated in at least three aspects: clarity about the type of valuation employed; adoption of a strong theoretical basis guided by ecological knowledge; and the inclusion of analytical…	Ecological valuation; Economic valuation; Water ecosystem services; Water sustainability						Fundação de Amparo à Pesquisa do Estado de São Paulo, FAPESP: 2013/08746-1	We would like to thank Foundation for State of S?o Paulo (FAPESP) for the financial support to the project (Number 2013/08746-1). We are also grateful to researchers Dr. Jean Paul Metzger, Dr. Evandro Mateus Moretto and Leandro Reverberi Tambosi by contributions.						Albert, C., Aronson, J., Fürst, C., Opdam, P., Integrating ecosystem services in landscape planning: requirements, approaches, and impacts (2014) Landsc. Ecol., 29, pp. 1277-1285; Amiri, B.J., Nakane, K., Modeling the linkage between river water quality and landscape metrics in the Chugoku District of Japan (2009) Water Resour. Manag., 23, pp. 931-956; Andreopoulos, D., Damigos, D., Comiti, F., F…	Hackbart, V.C.S.; Department of Ecology, Rua do Matão, 321, travessa 14, Brazil			Elsevier B.V.					22120416				English	Ecosyst. Serv.	Review	Final
Jones J., Almeida A., Cisneros F., Iroumé A., Jobbágy E., Lara A., Lima W.D.P., Little C., Llerena C., Silveira L., Villegas J.C.	57213224413;57191747596;15061187500;6603145197;6701852277;7006634082;6506682186;23493009900;6602436124;56267928000;24491286600;	Forests and water in South America	Exclude	-	2017	Hydrological Processes	31	5		972	980		25	10.1002/hyp.11035	https://www.scopus.com/inward/record.uri?eid=2-s2.0-85007331227&doi=10.1002%2fhyp.11035&partnerID=40&md5=3cf3dde2a8ec46a118500bdb64cfbb96	College of Earth, Ocean, and Atmospheric Sciences, Oregon State University, Corvallis, OR, United States; Land and Water, The Commonwealth Scientific and Industrial Research Organization, Hobart, TAS, Australia; Programa para el Manejo del agua y del suelo, Universidad de Cuenca, Cuenca, Ecuador; Facultad de Ciencias Forestales y Recursos Naturales, Universidad Austral de Chile, Valdivia, Chile; …	Jones, J., College of Earth, Ocean, and Atmospheric Sciences, Oregon State University, Corvallis, OR, United States; Almeida, A., Land and Water, The Commonwealth Scientific and Industrial Research Organization, Hobart, TAS, Australia; Cisneros, F., Programa para el Manejo del agua y del suelo, Universidad de Cuenca, Cuenca, Ecuador; Iroumé, A., Facultad de Ciencias Forestales y Recursos Naturale…	South America is experiencing rapid change in forest cover, of both native and planted forest. Forest cover loss is primarily attributable to fire, logging, and conversion of native forest to agriculture, pasture, and forest plantations, and types of change vary within and among the many diverse types of forests in South America. Major changes in forest cover and growing policy concerns underscor…	deforestation; ecosystem service trade-offs; forest plantations; paired watersheds; water yield	Commerce; Deforestation; Economic and social effects; Hydrogeology; Wood products; Collaborative research; Ecosystem services; Forest plantation; Management objectives; Paired watersheds; Sustainable forest management; Trade off; Water yield; Ecosystems; deforestation; ecosystem service; forest cover; forest management; land use change; sustainable forestry; trade-off; watershed; South America												Aguirre, J.Á.M., Sánchez, J.C.R., de Gonzalo Aranoa, C., Rueda, P.H., Fallas, J., Cisneros, F., Iturraspe, R., Forest use strategies in watershed management and restoration: application to three small mountain watersheds in Latin America (2014) Journal of Agricultural Engineering, 45, pp. 3-14; Aide, T.M., Clark, M.L., Grau, H.R., López-Carr, D., Levy, M.A., Redo, D., Muñiz, M., Deforestation and…	Jones, J.; College of Earth, United States; email: jonesj@geo.oregonstate.edu			John Wiley and Sons Ltd					8856087		HYPRE		English	Hydrol. Processes	Article	Final	All Open Access, Green
Qiu J., Wardropper C.B., Rissman A.R., Turner M.G.	37073321200;56495415800;16231058600;7403215651;	Spatial fit between water quality policies and hydrologic ecosystem services in an urbanizing agricultural landscape	Include	no	2017	Landscape Ecology	32	1		59	75		19	10.1007/s10980-016-0428-0	https://www.scopus.com/inward/record.uri?eid=2-s2.0-84981502115&doi=10.1007%2fs10980-016-0428-0&partnerID=40&md5=de6f183bc792b1bc24dcd2e3e2447416	Department of Zoology, University of Wisconsin-Madison, 430 Lincoln Dr., Madison, WI 53706, United States; Nelson Institute of Environmental Studies, University of Wisconsin-Madison, Madison, WI 53706, United States; Department of Forest and Wildlife Ecology, University of Wisconsin-Madison, Madison, WI 53706, United States	Qiu, J., Department of Zoology, University of Wisconsin-Madison, 430 Lincoln Dr., Madison, WI 53706, United States; Wardropper, C.B., Nelson Institute of Environmental Studies, University of Wisconsin-Madison, Madison, WI 53706, United States; Rissman, A.R., Department of Forest and Wildlife Ecology, University of Wisconsin-Madison, Madison, WI 53706, United States; Turner, M.G., Department of Zo…	Context: Sustaining hydrologic ecosystem services is critical for human wellbeing but challenged by land use for agriculture and urban development. Water policy and management strive to safeguard hydrologic services, yet implementation is often fragmented. Understanding the spatial fit between water polices and hydrologic services is needed to assess the spatial targeting of policy portfolios at …	Flood regulation; Freshwater; Groundwater quality; Groundwater recharge; Landscape ecology; Policy targeting; Spatial overlap; Surface-water quality; Wisconsin; Yahara Watershed	agricultural land; ecosystem service; groundwater resource; land use change; landscape ecology; policy making; recharge; spatial analysis; urban development; water quality; water supply; watershed; United States; Wisconsin					DEB 1038759; DEB 1440297; National Science Foundation, NSF: 1038759, 1440297	We thank Eric Booth and Chaoyi Chang for providing technical support on this study. Eric Booth provided valuable inputs and helpful comments on an earlier draft of the manuscript. We also appreciate constructive comments from four anonymous reviewers that greatly improved this manuscript. The project was funded by the National Science Foundation Water Sustainability and Climate grant (DEB 1038759…						Allan, J.D., McIntyre, P.B., Smith, S.D.P., Halpern, B.S., Boyer, G.L., Buchsbaum, A., Burton, G.A., Doran, P.J., Joint analysis of stressors and ecosystem services to enhance restoration effectiveness (2013) Proc Natl Acad Sci USA, 110 (1), pp. 372-377. , COI: 1:CAS:528:DC%2BC3sXnsFeisQ%3D%3D, PID: 23248308; Allan, J.D., Smith, S.D.P., McIntyre, P.B., Allan, J.D., Smith, S.D., McIntyre, P.B., Jo…	Qiu, J.; Department of Zoology, 430 Lincoln Dr., United States; email: jqiu7@wisc.edu			Springer Netherlands					9212973		LAECE		English	Landsc. Ecol.	Article	Final
Jujnovsky J., Ramos A., Caro-Borrero Á., Mazari-Hiriart M., Maass M., Almeida-Leñero L.	54890666000;57199666048;55511408100;6603618627;55534867800;12806664900;	Water assessment in a peri-urban watershed in Mexico City: A focus on an ecosystem services approach	Exclude	-	2017	Ecosystem Services	24			91	100		12	10.1016/j.ecoser.2017.02.005	https://www.scopus.com/inward/record.uri?eid=2-s2.0-85013959129&doi=10.1016%2fj.ecoser.2017.02.005&partnerID=40&md5=8b09cab03ad0df0280c54d0ff94945a9	Departamento de Ecología y Recursos Naturales, Facultad de Ciencias, Universidad Nacional Autónoma de México (UNAM), Ciudad Universitaria, Coyoacán, México D.F. 04510, Mexico; Laboratorio Nacional de Ciencias de la Sostenibilidad (LANCIS), Instituto de Ecología, Universidad Nacional Autónoma de México, Circuito Exterior, Ciudad Universitaria, Coyoacán, México D.F. 04510, Mexico; Posgrado en Cienc…	Jujnovsky, J., Departamento de Ecología y Recursos Naturales, Facultad de Ciencias, Universidad Nacional Autónoma de México (UNAM), Ciudad Universitaria, Coyoacán, México D.F. 04510, Mexico, Universidad ORT Mexico, Mexico; Ramos, A., Departamento de Ecología y Recursos Naturales, Facultad de Ciencias, Universidad Nacional Autónoma de México (UNAM), Ciudad Universitaria, Coyoacán, México D.F. 0451…	Among hydrological ecosystem services, water supply is one of the most relevant to society because of its role in human wellbeing; accordingly, it has been significantly modified worldwide. There has been a recent increase in the necessity of combining methods and tools to create interdisciplinary evaluations of water ecosystem services, especially in developing countries where there is a lack of…	Cultural perceptions; Economic valuation; Magdalena River Watershed; Stakeholders; Water quality; Water quantity													Bergstrom, J.C., Russell, R.B., Loomis, J.B., Economic valuation of river restoration: an analysis of the valuation literature and its uses in decision-making, , http://dx.doi.org/10.1016/j.wre.2016.12.001, In press Water Resour. Econ. DOI; Birol, E., Karousakis, K., Koundouri, P., Using economic valuation techniques to inform water resources management: a survey and critical appraisal of availab…	Jujnovsky, J.; Departamento de Ecología y Recursos Naturales, Mexico; email: julieta.jujnovsky@gmail.com			Elsevier B.V.					22120416				English	Ecosyst. Serv.	Article	Final
Zilio M.I., Alfonso M.B., Ferrelli F., Perillo G.M.E., Piccolo M.C.	54386372800;56604781800;57024001300;7004233707;16469784500;	Ecosystem services provision, tourism and climate variability in shallow lakes: The case of La Salada, Buenos Aires, Argentina	Include	no	2017	Tourism Management	62			208	217		11	10.1016/j.tourman.2017.04.008	https://www.scopus.com/inward/record.uri?eid=2-s2.0-85018781340&doi=10.1016%2fj.tourman.2017.04.008&partnerID=40&md5=ad4bc45e055cc0859d8f808b627821bd	CONICET - Universidad Nacional del Sur, Instituto de Investigaciones Económicas y Sociales del Sur, San Andrés 800, Altos de Palihue, Bahía Blanca, 8000, Argentina; Departamento de Economía, Universidad Nacional del Sur, San Andrés 800, Altos de Palihue, Bahía Blanca, 8000, Argentina; Instituto Argentino de Oceanografía (IADO), Universidad Nacional del Sur (UNS)-CONICET, Bahía Blanca, B8000BFW, A…	Zilio, M.I., CONICET - Universidad Nacional del Sur, Instituto de Investigaciones Económicas y Sociales del Sur, San Andrés 800, Altos de Palihue, Bahía Blanca, 8000, Argentina, Departamento de Economía, Universidad Nacional del Sur, San Andrés 800, Altos de Palihue, Bahía Blanca, 8000, Argentina; Alfonso, M.B., Instituto Argentino de Oceanografía (IADO), Universidad Nacional del Sur (UNS)-CONICE…	Water ecosystem services have been widely explored within the context of climate change studies, becoming a key piece in addressing local water challenges and designing possible strategies for diminishing climate risks. This paper explores how ecosystem services provision in La Salada shallow lake, Argentina, including maintenance of the landscape for touristic and recreational activities, have b…	Climate variability; Ecosystem services; La Salada shallow lake; Participatory research; Stakeholders; Tourism	climate change; climate conditions; climate variation; ecosystem service; lake water; recreational activity; stakeholder; tourism; Argentina; Buenos Aires [Argentina]												Alfonso, M.B., Vitale, A.J., Menéndez, M.C., Perillo, V.L., Piccolo, M.C., Perillo, G.M.E., Estimation of ecosystem metabolism from diel oxygen technique in a saline shallow lake: La Salada (Argentina) (2015) Hydrobiologia, 752, pp. 223-237; Aliaga, V.S., Ferrelli, F., Alberdi-Algarañaz, E.D., Bohn, V.Y., Piccolo, M.C., Distribución y variabilidad de la precipitación en la Región Pampeana, Argent…	Zilio, M.I.; CONICET - Universidad Nacional del Sur, San Andrés 800, Altos de Palihue, Argentina; email: mizilio@iiess-conicet.gob.ar			Elsevier Ltd					2615177				English	Tour. Manage.	Article	Final
Reynaud A., Lanzanova D., Liquete C., Grizzetti B.	7006748061;56801109000;9042377200;55918935000;	Going green? Ex-post valuation of a multipurpose water infrastructure in Northern Italy	Include	no	2017	Ecosystem Services	27			70	81		10	10.1016/j.ecoser.2017.07.015	https://www.scopus.com/inward/record.uri?eid=2-s2.0-85028319717&doi=10.1016%2fj.ecoser.2017.07.015&partnerID=40&md5=d42d3b320af024252bc1bf1da89d99d3	Toulouse School of Economics, INRA, University of Toulouse Capitole, Toulouse, France; Center for Development Research (ZEF), University of Bonn, Bonn, Germany; European Commission, Joint Research Centre (JRC), Directorate D – Sustainable ResourcesIspra, Italy	Reynaud, A., Toulouse School of Economics, INRA, University of Toulouse Capitole, Toulouse, France, European Commission, Joint Research Centre (JRC), Directorate D – Sustainable ResourcesIspra, Italy; Lanzanova, D., Center for Development Research (ZEF), University of Bonn, Bonn, Germany, European Commission, Joint Research Centre (JRC), Directorate D – Sustainable ResourcesIspra, Italy; Liquete,…	A contingent valuation approach is used to estimate how households value different multipurpose infrastructures (conventional or green) for managing flood risk and water pollution. As a case study we consider the Gorla Maggiore water park located in the Lombardy Region, in Northern Italy. The park is a neo-ecosystem including an infrastructure to treat waste water and store excess rain water, bui…	Contingent valuation; Economics; Ecosystem services; Green infrastructure; Nature-based solution						Seventh Framework Programme, FP7: 308428; Seventh Framework Programme	This work is a part of the FP7 project OpenNESS (Operationalisation of natural capital and ecosystem services) founded by the European Union’s Seventh Programme for research, technological development and demonstration under grant agreement No 308428 .						Arrow, K., Solow, R., Portney, E.E., Leamer, P.R., Radner, R., Schuman, H., Report of the NOAA panel on contingent valuation (1993) Fed. Reg., 58 (10), pp. 4602-4614; Baptiste, A.K., Foley, C., Smardon, R., Understanding urban neighborhood differences in willingness to implement green infrastructure measures: a case study of Syracuse, NY (2015) Landscape Urban Plann., 136, pp. 1-12; Bateman, I.J.…	Reynaud, A.; Toulouse School of Economics, France; email: arnaud.reynaud@inra.fr			Elsevier B.V.					22120416				English	Ecosyst. Serv.	Article	Final	All Open Access, Hybrid Gold, Green
Damigos D., Tentes G., Balzarini M., Furlanis F., Vianello A.	6602621626;52264740800;57195490528;57195494829;57195490751;	Revealing the economic value of managed aquifer recharge: Evidence from a contingent valuation study in Italy	Exclude	-	2017	Water Resources Research	53	8		6597	6611		10	10.1002/2016WR020281	https://www.scopus.com/inward/record.uri?eid=2-s2.0-85028455242&doi=10.1002%2f2016WR020281&partnerID=40&md5=e02c13ac263c704e852eef9e3b4da8b6	School of Mining and Metallurgical Engineering, National Technical University of Athens, Athens, Greece; SGI Studio Galli Ingegneria Srl, Rome, Italy; SdV consulenze e ricerche di marketing, Padova, Italy	Damigos, D., School of Mining and Metallurgical Engineering, National Technical University of Athens, Athens, Greece; Tentes, G., School of Mining and Metallurgical Engineering, National Technical University of Athens, Athens, Greece; Balzarini, M., SGI Studio Galli Ingegneria Srl, Rome, Italy; Furlanis, F., SGI Studio Galli Ingegneria Srl, Rome, Italy; Vianello, A., SdV consulenze e ricerche di …	Managed aquifer recharge [MAR) is a promising water management tool toward restoring groundwater balance and securing groundwater ecosystem services (i.e., water for drinking, industrial or irrigation use, control of land subsidence, maintenance of environmental flows to groundwater dependent ecosystems, etc.). Obviously, MAR projects can improve the quality of lives of the people by several ways…	contingent valuation method; groundwater; managed aquifer recharge; nonmarket valuation	Aquifers; Ecology; Economic analysis; Economics; Ecosystems; Groundwater; Groundwater resources; Potable water; Resource valuation; Water management; Contingent valuation methods; Contingent valuations; Groundwater conservation; Groundwater dependent ecosystems; Groundwater management; Managed aquifer recharges; Non-market valuation; Total economic values; Recharging (underground waters); aquifer…					619120	This research is being financed by MARSOL – Demonstrating Managed Aquifer Recharge as a Solution to Water Scarcity and Drought (http:// www.marsol.eu/), an Environment 2013 Cooperation Project funded by European Union’s Seventh Program for research, technological development and demonstration under grant agreement [619120]. We also thank the three reviewers for their constructive comments and hel…						Ajzen, I., Brown, T.C., Carvajal, F., Explaining the discrepancy between intentions and actions: The case of hypothetical bias in contingent valuation (2004) Personality Soc. Psychol. Bull., 30 (9), pp. 1108-1121; Alberini, A., Kahn, J.R., (2006) Handbook on Contingent Valuation, p. 448. , (Eds.) (, Edward Elgar, Cheltenham, U. K; Alfarra, A., Sonneveld, B.G.J.S., Hoetzl, H., Farmers' willingness…	Damigos, D.; School of Mining and Metallurgical Engineering, Greece; email: damigos@metal.ntua.gr			Blackwell Publishing Ltd					431397		WRERA		English	Water Resour. Res.	Article	Final
López-Morales C.A., Mesa-Jurado M.A.	24470882600;36662589300;	Valuation of hidden water ecosystem services: The replacement cost of the aquifer system in central Mexico	Exclude	-	2017	Water (Switzerland)	9	8	571				10	10.3390/w9080571	https://www.scopus.com/inward/record.uri?eid=2-s2.0-85026785686&doi=10.3390%2fw9080571&partnerID=40&md5=9c0cc65c31dcd10befc2f2c7659223cc	Centro de Estudios Demográficos, Urbanos y Ambientales, El Colegio de México, Carretera Picacho Ajusco 20, Col. Ampliación Fuentes del Pedregal, C.P. 14110, Tlalpan, Mexico City, 14110, Mexico; El Colegio de la Frontera Sur, Carretera a Reforma km 15.5 s/n, Ra Guineo 2a Seccion, Villahermosa, Tabasco, 86027, Mexico	López-Morales, C.A., Centro de Estudios Demográficos, Urbanos y Ambientales, El Colegio de México, Carretera Picacho Ajusco 20, Col. Ampliación Fuentes del Pedregal, C.P. 14110, Tlalpan, Mexico City, 14110, Mexico; Mesa-Jurado, M.A., El Colegio de la Frontera Sur, Carretera a Reforma km 15.5 s/n, Ra Guineo 2a Seccion, Villahermosa, Tabasco, 86027, Mexico	This paper reports research estimating the costs of replacing the groundwater that the metropolitan areas of Mexico City, Toluca, and Cuernavaca, in Central Mexico, pump from 10 over-exploited aquifers with 6 supply alternatives of surface water. These aquifers provide about 70% of the water required by more than 28 million people, and their recharge zones in forested areas are increasingly threa…	Aquifers; Economic valuation; Forest conservation; Groundwater; Mexico; Replacement cost; Urban leak control; Water policy; Water scarcity	Aquifers; Conservation; Constrained optimization; Cost estimating; Costs; Ecology; Economics; Extraction; Forestry; Groundwater; Groundwater resources; Hydrogeology; Surface waters; Water management; Economic valuation; Forest conservation; Leak control; Me-xico; Replacement costs; Water policies; Water scarcity; Ecosystems; aquifer; cost analysis; ecosystem service; exploitation; forest; groundw…												(2015) The United Nations World Water Development Report 2015: Water for a Sustainable World, United Nations World Water Assessment Programme, , UNESCO: Paris, France; Mekonnen, M.M., Hoekstra, A.Y., Four billion people facing severe water scarcity (2016) Sci. Adv., 2; (2012) Environmental Outlook to 2050, , OECD Publishing: Paris, France; Tang, Q., Lettenmaier, D.P., 21st Century runoff sensitiv…	Mesa-Jurado, M.A.; El Colegio de la Frontera Sur, Carretera a Reforma km 15.5 s/n, Ra Guineo 2a Seccion, Mexico; email: mmesa@ecosur.mx			MDPI AG					20734441				English	Water	Article	Final	All Open Access, Gold
Pappalardo S.E., Ibrahim H.M.S., Cerinato S., Borin M.	56044480500;57198451091;57198443812;7006314141;	Assessing the water-purification service in an integrated agricultural wetland within the Venetian Lagoon drainage system	Include	no	2017	Marine and Freshwater Research	68	12		2205	2215		10	10.1071/MF16083	https://www.scopus.com/inward/record.uri?eid=2-s2.0-85025628762&doi=10.1071%2fMF16083&partnerID=40&md5=0386619426a9d8b0e20a5e9ccfa9ed36	Department of Agronomy, Food, Natural Resources, Animals and Environment (DAFNAE), University of Padua, Viale dell' Universita 16, Legnaro (PD), I-35020, Italy	Pappalardo, S.E., Department of Agronomy, Food, Natural Resources, Animals and Environment (DAFNAE), University of Padua, Viale dell' Universita 16, Legnaro (PD), I-35020, Italy; Ibrahim, H.M.S., Department of Agronomy, Food, Natural Resources, Animals and Environment (DAFNAE), University of Padua, Viale dell' Universita 16, Legnaro (PD), I-35020, Italy; Cerinato, S., Department of Agronomy, Food…	Wetlands are a cornerstone of beneficial ecosystem services, especially in intensive agricultural landscapes characterised by nutrient loss, and shallow and surface water bodies. Water-purification services can trap 80-90% of the sediments and eliminate 70-90% of the entering nitrogen. An experimental wetland of 3.2ha was created within the Venetian drainage system to control nutrient loss from c…	biodiversity; ecosystem services; macrophytes; phytoremediation.	assessment method; biodiversity; concentration (composition); constructed wetland; drainage network; ecosystem service; environmental management; environmental monitoring; experimental study; grass; integrated approach; lagoon; macrophyte; nutrient loss; phytoremediation; purification; runoff; surface water; Italy; Carex; Lythrum salicaria					Regione del Veneto	This research was carried out with financial support from Veneto Agri-coltura (Regione Veneto), ‘Finanziamento della Regione del Veneto – Sezione Agroambiente ‘Incentivazione all’innovazione ambientale ecocompatibile in agricoltura nel Bacino Scolante il Laguna di Venezia – Scheda progetto C 5.1.5’, as part of the project ‘Fitodepurazione delle Acque per il Trattamento dell’Azoto (FATA)’. The aut…						(2005) Official Methods of Analysis of AOAC International, pp. 5-20. , AOAC International. Chapter 2, Fertilizers., 18th edn. (Eds W. Horwitz and G. W. Latimer Jr.). (AOAC International: Gaithersburg, MD, USA.); Arduino, E., Barberis, E., XIII Determinazione del fosforo assimilabile (Metodo Olsen) (2000) Metodi di Analisi Chimica Del Suolo. Ministero Delle Politiche Agricole e Forestali, Osservat…	Pappalardo, S.E.; Department of Agronomy, Viale dell' Universita 16, Italy; email: salvatore.pappalardo@unipd.it			CSIRO					13231650		AJMFA		English	Mar. Freshw. Res.	Article	Final	All Open Access, Green
Goldstein J.H., Tallis H., Cole A., Schill S., Martin E., Heiner M., Paiz M.-C., Aldous A., Apse C., Nickel B.	14028269100;23487258300;57194508781;6603783351;55383620800;36668807400;57194499132;8601009400;16678241900;39262385300;	Spatial planning for a green economy: National-level hydrologic ecosystem services priority areas for Gabon	Include	no	2017	PLoS ONE	12	6	e0179008				5	10.1371/journal.pone.0179008	https://www.scopus.com/inward/record.uri?eid=2-s2.0-85020442864&doi=10.1371%2fjournal.pone.0179008&partnerID=40&md5=326dfe78a9492b3f93c4385b69508636	Nature Conservancy, Office of the Chief Scientist, Fort Collins, CO, United States; Nature Conservancy, Office of the Chief Scientist, Santa Cruz, CA, United States; Center for Integrated Spatial Research, University of California-Santa Cruz, Santa Cruz, CA, United States; Caribbean Program, Nature Conservancy, Provo, UT, United States; Eastern Conservation Team, Nature Conservancy, Brunswick, ME…	Goldstein, J.H., Nature Conservancy, Office of the Chief Scientist, Fort Collins, CO, United States; Tallis, H., Nature Conservancy, Office of the Chief Scientist, Santa Cruz, CA, United States; Cole, A., Center for Integrated Spatial Research, University of California-Santa Cruz, Santa Cruz, CA, United States; Schill, S., Caribbean Program, Nature Conservancy, Provo, UT, United States; Martin, E…	Rapidly developing countries contain both the bulk of intact natural areas and biodiversity, and the greatest untapped natural resource stocks, placing them at the forefront of "green" economic development opportunities. However, most lack scientific tools to create development plans that account for biodiversity and ecosystem services, diminishing the real potential to be sustainable. Existing m…		ground water; rain; Article; biodiversity; environmental erosion; environmental management; environmental planning; environmental protection; evapotranspiration; forestry; Gabon; government; human; hydrology; rural area; soil depth; soil texture; watershed; ecosystem; environmental protection; Conservation of Natural Resources; Ecosystem; Gabon; Hydrology					Bernard and Anne Spitzer Charitable Trust; Centre National pour la Recherche Scientifique et Technique, CNRST; Agence Nationale Des Parcs Nationaux, ANPN	Funding was provided by the Anne Ray Charitable Trust. The funder had no role in study design, data collection and analysis, decision to publish, or preparation of the manuscript. The authors are not aware of any competing interests on the part of the funder. We thank Joe Fargione, Bronson Griscom, Justine Hausheer, Jonathan Higgins, Peter Kareiva, Erik Lowe, Matt Miller, Paulo Petry, Adrian Vogl…						(2012) Strategic Transport Infrastructure Needs to 2030, , OECD. Paris: OECD Publishing; Nelson, E., Sander, H., Hawthorne, P., Conte, M., Ennaanay, D., Wolny, S., Projecting global land-use change and its effect on ecosystem service provision and biodiversity with simple models (2010) PLoS One, , https://doi.org/10.1371/journal.pone.0014327, PMID: 21179509; Cardinale, B.J., Duffy, J.E., Gonzalez…	Goldstein, J.H.; Nature Conservancy, Office of the Chief Scientist, United States; email: jgoldstein@tnc.org			Public Library of Science					19326203		POLNC	28594870	English	PLoS ONE	Article	Final	All Open Access, Gold, Green
Bucak T., Trolle D., Tavşanoğlu Ü.N., Çakıroğlu A.İ., Özen A., Jeppesen E., Beklioğlu M.	55250858900;24466921300;56305808000;56099941300;35171029100;7005087752;6603923669;	Modeling the effects of climatic and land use changes on phytoplankton and water quality of the largest Turkish freshwater lake: Lake Beyşehir	Exclude	-	2018	Science of the Total Environment	621			802	816		55	10.1016/j.scitotenv.2017.11.258	https://www.scopus.com/inward/record.uri?eid=2-s2.0-85036472986&doi=10.1016%2fj.scitotenv.2017.11.258&partnerID=40&md5=5dfb06edc6afcfe609db6df724dadf50	Limnology Laboratory, Department of Biological Sciences, Middle East Technical University, Çankaya, Ankara, 06800, Turkey; Department of Bioscience, Aarhus University, Vejlsøvej 25, Silkeborg, 8600, Denmark; Sino-Danish Centre for Education and Research (SDC), Beijing, China; Department of Forest Engineering, Çankırı Karatekin University, Çankırı, 18200, Turkey; Kemal Kurdaş Ecological Research a…	Bucak, T., Limnology Laboratory, Department of Biological Sciences, Middle East Technical University, Çankaya, Ankara, 06800, Turkey; Trolle, D., Department of Bioscience, Aarhus University, Vejlsøvej 25, Silkeborg, 8600, Denmark, Sino-Danish Centre for Education and Research (SDC), Beijing, China; Tavşanoğlu, Ü.N., Limnology Laboratory, Department of Biological Sciences, Middle East Technical Un…	Climate change and intense land use practices are the main threats to ecosystem structure and services of Mediterranean lakes. Therefore, it is essential to predict the future changes and develop mitigation measures to combat such pressures. In this study, Lake Beyşehir, the largest freshwater lake in the Mediterranean basin, was selected to study the impacts of climate change and various land us…	Cyanobacteria; Ecosystem services; Lake modeling; Mediterranean	Ecosystems; Hydrogeology; Lakes; Land use; Nutrients; Phytoplankton; Potable water; Runoff; Temperature; Thermal processing (foods); Water levels; Water quality; Water supply; Cyanobacteria; Ecosystem services; Effects of temperature; Freshwater ecosystem; General circulation model; Lake model; Mediterranean; Sources of uncertainty; Climate change; chlorophyll a; drinking water; phosphorus; chlor…		chlorophyll a, 479-61-8; phosphorus, 7723-14-0; chlorophyll, 1406-65-1, 15611-43-5; Chlorophyll; chlorophyll a			244121; BAP-08-11-DP T-2002-K120510; 110Y125; Mars: 603378	This study was funded by 7 th EU Framework Programme (MARS project: 603378 , REFRESH project: 244121 ), Theme 6 (Environment including Climate Change) projects: REFRESH (Adaptive Strategies to Mitigate the Impacts of Climate Change on European Freshwater Ecosystems , Contract No.: 244121 , http://www.refresh.ucl.ac.uk /), MARS (Managing Aquatic ecosystems and water Resources under multiple Stress…						Abbaspour, K.C., SWAT-CUP 2012: SWAT Calibration and Uncertainty Programs-A User Manual. Dübendorf, Switzerland (2013); Arhonditsis, G.B., Brett, M.T., Evaluation of the current state of mechanistic aquatic biogeochemical modeling (2004) Mar. Ecol. Prog. Ser., 271, pp. 13-26; Arhonditsis, G.B., Brett, M.T., Eutrophication model for Lake Washington (USA): part I. Model description and sensitivity …	Bucak, T.; Limnology Laboratory, Çankaya, Turkey; email: tuba.bucak@metu.edu.tr			Elsevier B.V.					489697		STEVA	29202291	English	Sci. Total Environ.	Article	Final
Vörösmarty C.J., Rodríguez Osuna V., Cak A.D., Bhaduri A., Bunn S.E., Corsi F., Gastelumendi J., Green P., Harrison I., Lawford R., Marcotullio P.J., McClain M., McDonald R., McIntyre P., Palmer M., Robarts R.D., Szöllösi-Nagy A., Tessler Z., Uhlenbrook S.	7003886966;56996043500;15843023600;23466278100;7007032760;57200440162;57204030082;7402935038;54894231600;6603018179;6507504496;7005709244;7401841070;55546696300;7401917107;7004073097;57225265738;56061821700;7004218809;	Ecosystem-based water security and the Sustainable Development Goals (SDGs)	Include	no	2018	Ecohydrology and Hydrobiology	18	4		317	333		38	10.1016/j.ecohyd.2018.07.004	https://www.scopus.com/inward/record.uri?eid=2-s2.0-85054150265&doi=10.1016%2fj.ecohyd.2018.07.004&partnerID=40&md5=ece0d313bf27d2d5b28936382aaaf13b	Advanced Science Research Center at the Graduate Center, CUNY, United States; The City College of New York, CUNY, United States; The Intergovernmental Science-Policy Platform on Biodiversity and Ecosystem Services (IPBES): Americas Regional Assessment, Germany; Australian Rivers Institute/Griffith University, Australia; Sustainable Water Future Programme, Australia; The Nature Conservancy, United…	Vörösmarty, C.J., Advanced Science Research Center at the Graduate Center, CUNY, United States, The City College of New York, CUNY, United States; Rodríguez Osuna, V., Advanced Science Research Center at the Graduate Center, CUNY, United States, The Intergovernmental Science-Policy Platform on Biodiversity and Ecosystem Services (IPBES): Americas Regional Assessment, Germany; Cak, A.D., Advanced …	The economic development-environmental protection dichotomy is an out-dated construct. A 21st century approach to the world's water problems is progressively being developed by researchers and practitioners, who are combining traditional and ecosystem-based engineering systems to yield cost-effective solutions. Given the continuing and widespread loss of ecological services and functions, water s…	Ecosystem-based solutions; Green infrastructure; Sustainable water security; Water-related ecosystem services	economic development; ecosystem service; environmental economics; environmental protection; greenspace; sustainability; sustainable development; twenty first century												Abell, R., Asquith, N., Boccaletti, G., Bremer, L., Chapin, E., Erickson-Quiroz, A., Higgins, J., Wood, S., Beyond the Source: The Environmental, Economic and Community Benefits of Source Water (2017), https://www.cbd.int/financial/2017docs/tnc-water-source.pdf, The Nature Conservancy; Arlington, VA. Retrieved from; Addams, L., Boccaletti, G., Kerlin, M., Stuchtey, M., Charting Our Water Future. …	Rodríguez Osuna, V.; Environmental Sciences Initiative, United States; email: vanesa.rodriguez.osuna@asrc.cuny.edu			Elsevier B.V.					16423593		EHCYA		English	Ecohydrol. Hydrobiol.	Article	Final
Taffarello D., Srinivasan R., Samprogna Mohor G., Guimarães J.L.B., Do Carmo Calijuri M., Mendiondo E.M.	24512736100;7401951879;56688642500;57200622159;6602271742;7801402127;	Modeling freshwater quality scenarios with ecosystem-based adaptation in the headwaters of the Cantareira system, Brazil	Exclude	-	2018	Hydrology and Earth System Sciences	22	9		4699	4723		16	10.5194/hess-22-4699-2018	https://www.scopus.com/inward/record.uri?eid=2-s2.0-85053325458&doi=10.5194%2fhess-22-4699-2018&partnerID=40&md5=3e220c6571dac2a2c1aec7f8863dc85a	São Carlos School of Engineering, University of São Paulo, São Carlos, SP, 13566-590, Brazil; Spatial Science Laboratory, Ecosystem Science and Management Department, Texas A and M University, College Station, TX 77801, United States; Institute of Earth and Environmental Science, University of Potsdam, Karl-Liebknecht-Str. 24-25, Potsdam, 14476, Germany; Aquaflora Meio Ambiente, Curitiba, PR, 821…	Taffarello, D., São Carlos School of Engineering, University of São Paulo, São Carlos, SP, 13566-590, Brazil; Srinivasan, R., Spatial Science Laboratory, Ecosystem Science and Management Department, Texas A and M University, College Station, TX 77801, United States; Samprogna Mohor, G., São Carlos School of Engineering, University of São Paulo, São Carlos, SP, 13566-590, Brazil, Institute of Eart…	Although hydrologic models provide hypothesis testing of complex dynamics occurring at catchments, freshwater quality modeling is still incipient at many subtropical headwaters. In Brazil, a few modeling studies assess freshwater nutrients, limiting policies on hydrologic ecosystem services. This paper aims to compare freshwater quality scenarios under different land-use and land-cover (LULC) cha…		Behavioral research; Conservation; Decision making; Land use; Rain; River pollution; Runoff; Water quality; Water supply; Water supply systems; Best management practices; Conservation practices; Critical threshold; Land use and land cover; Metropolitan regions; Soil and water assessment tool; Water pollution levels; Water quality simulation; Ecosystems; adaptive management; best management practi…					Fundação de Amparo à Pesquisa do Estado de São Paulo, FAPESP: 2012/22013-4, 2014/15080-2, 2014/50848-9; Conselho Nacional de Desenvolvimento Científico e Tecnológico, CNPq: 2008/58161-1, 465501/2014-1, 88887.091743/2014-01, 88887.137891/2017-00, CAPES/PNPD-SHS/EESC/USP, PQ 312056/2016-8	Acknowledgements. This paper was supported by the Sao Paulo Research Foundation (FAPESP) through grants no. 2012/22013-4, no. 2014/15080-2, no. 2014/50848-9: INCT-Climate Change Phase II, Water Security Subcomponent (also granted by CNPq 465501/2014-1 and CAPES 88887.137891/2017-00); and no. 2008/58161-1: Assessment of Impacts and Vulnerability to Climate Change in Brazil and Strategies for Adapt…						Abbaspour, K.C., Rouholahnejad, E., Vaghefi, S., Srinivasan, R., Yang, H., Kløve, B., A continental-scale hydrology and water quality model for Europe: Calibration and uncertainty of a high-resolution large-scale SWAT model (2015) J. Hydrol., 524, pp. 733-752; Aldaya, M.M., Llamas, M.R., (2008) Water Footprint Analysis for the Guadiana River Basin. Value of Water Research Report Series No. 35, , …	Taffarello, D.; São Carlos School of Engineering, Brazil; email: taffarellod@gmail.com			Copernicus GmbH					10275606				English	Hydrol. Earth Syst. Sci.	Article	Final	All Open Access, Gold, Green
Zhang H., Jin G., Yu Y.	37059948000;56508827600;57201477363;	Review of river basinwater resource management in China	Exclude	-	2018	Water (Switzerland)	10	4	425				12	10.3390/w10040425	https://www.scopus.com/inward/record.uri?eid=2-s2.0-85045075223&doi=10.3390%2fw10040425&partnerID=40&md5=cbda96d9f4030d0c353ace08c3e7c6f0	School of Urban and Environment, Yunnan University of Finances and Economics, Kunming, 650221, China; Faculty of Resources and Environmental Science, Hubei University, Wuhan, 430062, China	Zhang, H., School of Urban and Environment, Yunnan University of Finances and Economics, Kunming, 650221, China; Jin, G., Faculty of Resources and Environmental Science, Hubei University, Wuhan, 430062, China; Yu, Y., Faculty of Resources and Environmental Science, Hubei University, Wuhan, 430062, China	Water resources are the basis for supporting the entire life system of the Earth. However, with the frequent global water crises-especially in the river basins of China-the issue of water resources has become a bottleneck that limits its development. Therefore, it is necessary to carry out relevant research. In this paper, we systematically analyzed different classification methods of the service…	Basin; China; Water crisis; Water ecosystem service functions; Water resource management	Commerce; Hydrogeology; Land use; Resource allocation; Rivers; Water management; Watersheds; Basin; China; Water crisis; Water ecosystems; Waterresource management; Ecosystems; basin management; crisis management; ecosystem service; exploitation; resource allocation; resource use; river basin; river water; trade-off; water management; water resource; China					National Natural Science Foundation of China, NSFC: 41501593, 71363061	This research was financially supported by the National Natural Science Foundation of China (Grant No. 71363061, 41501593).						Xia, J., Zhai, J.L., Zhan, C.S., Some reflections on the research and development of water resources in China (2011) Adv. Earth Sci, 26, pp. 905-915; Li, F., Sun, R.H., Yang, L.R., Chen, L.D., Assessment of freshwater ecosystem services in Beijing based on demand and supply (2010) Chin. J. Appl. Ecol, 21, pp. 1146-1152. , (In Chinese); Schroter, D., Ecosystem service supply and vulnerability to g…	Zhang, H.; School of Urban and Environment, China; email: zhanghong0957@sina.com			MDPI AG					20734441				English	Water	Review	Final	All Open Access, Gold, Green
Lopez Porras G., Stringer L.C., Quinn C.H.	57202086132;14018839600;8202525200;	Unravelling Stakeholder Perceptions to Enable Adaptive Water Governance in Dryland Systems	Exclude	-	2018	Water Resources Management	32	10		3285	3301		8	10.1007/s11269-018-1991-8	https://www.scopus.com/inward/record.uri?eid=2-s2.0-85047109755&doi=10.1007%2fs11269-018-1991-8&partnerID=40&md5=825e7348920aa0f6534ba892fe81fccb	Sustainability Research Institute, School of Earth and Environment, University of Leeds, Woodhouse Lane, Leeds, LS2 9JT, United Kingdom	Lopez Porras, G., Sustainability Research Institute, School of Earth and Environment, University of Leeds, Woodhouse Lane, Leeds, LS2 9JT, United Kingdom; Stringer, L.C., Sustainability Research Institute, School of Earth and Environment, University of Leeds, Woodhouse Lane, Leeds, LS2 9JT, United Kingdom; Quinn, C.H., Sustainability Research Institute, School of Earth and Environment, University…	Adaptive water governance seeks to increase a social-ecological system’s adaptive capacity in the face of uncertainty and change. This is especially important in non-linear dryland systems that are already exposed to water scarcity and increasing degradation. Conservation of water ecosystem services is key for increasing adaptive capacity in drylands, however, how stakeholders perceive water ecos…	Agricultural systems; Conflicts; Knowledge sharing; Mexico; Social-ecological resilience; Water scarcity	Hydrogeology; Water conservation; Watersheds; Agricultural system; Conflicts; Knowledge-sharing; Me-xico; Social-ecological resilience; Water scarcity; Ecosystems; adaptive management; ecosystem service; farming system; governance approach; knowledge; perception; stakeholder; water management					439115	The first author acknowledges financial support from CONACYT-SECRETARIA DE ENERGIA-SUSTENTABILIDAD ENERGETICA Grant No. 439115. None.	Acknowledgments The first author acknowledges financial support from CONACYT-SECRETARIA DE ENERGIA-SUSTENTABILIDAD ENERGETICA Grant No. 439115.					Athie, K., (2016) El Agua, ayer y hoy, , Camara de Diputados LXIII Legislatura, Mexico City; Bernard, H.R., (2011) Research methods in anthropology: qualitative and quantitative approaches, , 5, AltaMira, Maryland; Bhattacherjee, A., (2012) Social Science Research: Principles, Methods, and Practices, Book 3, , Textbooks Collection; Burnett, V., Mennonite Farmers Prepare to Leave Mexico, and Compe…	Lopez Porras, G.; Sustainability Research Institute, Woodhouse Lane, United Kingdom; email: eegilp@leeds.ac.uk			Springer Netherlands					9204741				English	Water Resour. Manage.	Article	Final	All Open Access, Green
Uden D.R., Allen C.R., Munoz-Arriola F., Ou G., Shank N.	54788455300;7402265908;35435670800;25924533700;14422659400;	A framework for tracing social-ecological trajectories and traps in intensive agricultural landscapes	Exclude	-	2018	Sustainability (Switzerland)	10	5	1646				4	10.3390/su10051646	https://www.scopus.com/inward/record.uri?eid=2-s2.0-85047170171&doi=10.3390%2fsu10051646&partnerID=40&md5=e68ad6c6ffdbe3f5507bff087ff48d97	Nebraska Cooperative Fish and Wildlife Research Unit, School of Natural Resources, University of Nebraska-Lincoln, Lincoln, NE 68583, United States; U.S. Geological Survey, Nebraska Cooperative Fish and Wildlife Research Unit, School of Natural Resources, University of Nebraska-Lincoln, Lincoln, NE 68583, United States; Biological Systems Engineering Department, University of Nebraska-Lincoln, Li…	Uden, D.R., Nebraska Cooperative Fish and Wildlife Research Unit, School of Natural Resources, University of Nebraska-Lincoln, Lincoln, NE 68583, United States; Allen, C.R., U.S. Geological Survey, Nebraska Cooperative Fish and Wildlife Research Unit, School of Natural Resources, University of Nebraska-Lincoln, Lincoln, NE 68583, United States; Munoz-Arriola, F., Biological Systems Engineering De…	Charting trajectories toward sustainable agricultural development is an important goal at the food-energy-water-ecosystem services (FEWES) nexus of agricultural landscapes. Social-ecological adaptation and transformation are two broad strategies for adjusting and resetting the trajectories of productive FEWES nexuses toward sustainable futures. In some cases, financial incentives, technological i…	Agriculture; Feedbacks; Governance; Management; Resilience; Rigidity; Social-ecological systems; Sustainable agricultural development	adaptive management; agricultural development; agricultural land; agricultural management; alternative agriculture; ecosystem resilience; governance approach; intensive agriculture; strategic approach					National Science Foundation, NSF: 1735362; U.S. Fish and Wildlife Service, USFWS; U.S. Geological Survey, USGS	Acknowledgments: The authors would like to thank Noelle Hart and several anonymous reviewers for their contributions to this manuscript. The Nebraska Cooperative Fish and Wildlife Research Unit is jointly supported by a cooperative agreement between the U.S. Geological Survey, the Nebraska Game and Parks Commission, the University of Nebraska—Lincoln, the U.S. Fish and Wildlife Service, and the W…						Chapin, F.S., III, Folke, C., Kofinas, G.P., A framework for understanding change (2009) Principles of Ecosystem Stewardship: Resilience-Based Natural Resource Management in a Changing World, pp. 3-28. , Chapin, F.S., III, Kofinas, G.P., Folke, C., Eds.; Springer: New York, NY, USA; Folke, C., Carpenter, S.R., Walker, B., Scheffer, M., Chapin, T., Rockström, J., Resilience thinking: Integrating r…	Uden, D.R.; Nebraska Cooperative Fish and Wildlife Research Unit, United States; email: duden2@unl.edu			MDPI AG					20711050				English	Sustainability	Article	Final	All Open Access, Gold, Green
Uchida E., Swallow S.K., Gold A.J., Opaluch J., Kafle A., Merrill N.H., Michaud C., Gill C.A.	8586829500;7004241597;7103002980;6701802203;56191202800;56007066900;57194087183;57143743500;	Integrating Watershed Hydrology and Economics to Establish a Local Market for Water Quality Improvement: A Field Experiment	Include	no	2018	Ecological Economics	146			17	25		3	10.1016/j.ecolecon.2017.09.003	https://www.scopus.com/inward/record.uri?eid=2-s2.0-85033495285&doi=10.1016%2fj.ecolecon.2017.09.003&partnerID=40&md5=649139cd068d3b595e6b5825683c176f	Department of Environmental and Natural Resource Economics, University of Rhode Island, 1 Greenhouse Road, Kingston, RI 02881, United States; Center for Environmental Sciences and Engineering and Department of Agricultural and Resource Economics, University of ConnecticutCT 06269, United States; Department of Natural Resources Science, University of Rhode Island, 1 Greenhouse Road, Kingston, RI 0…	Uchida, E., Department of Environmental and Natural Resource Economics, University of Rhode Island, 1 Greenhouse Road, Kingston, RI 02881, United States; Swallow, S.K., Center for Environmental Sciences and Engineering and Department of Agricultural and Resource Economics, University of ConnecticutCT 06269, United States; Gold, A.J., Department of Natural Resources Science, University of Rhode Is…	Innovative market mechanisms are being increasingly recognized as effective decision-making institutions to incorporate the value of ecosystem services into the economy. We present a field experiment that integrates an economic auction and a biophysical water flux model to develop a local market process consisting of both the supply and demand sides. On the supply side, we operate an auction with…	Auctions; Hydrologic ecosystem services; Market-based approach; Water quality	auction; decision making; ecosystem service; hydrology; innovation; integrated approach; market conditions; water demand; water economics; water management; water quality; water supply; watershed					U.S. Department of Agriculture, USDA; National Institute of Food and Agriculture, NIFA: 1006050, 2010-65615-20669; AES Corporation, AES: CONS00971; University of Connecticut	In a full market approach, buyers would not be restricted just to the 99 participants that we recruited within our research-grant budget to implement this experimental market. We therefore scaled the offers in the workshops upward using an external fund. At the market equilibrium, every dollar contributed by a participant was leveraged with $10.75 from the research grant funded by the US Departme…	The authors gratefully acknowledge the funding for this project from USDA National Institute of Food and Agriculture (Grant # 2010-65615-20669 and Hatch 1006050 ), University of Rhode Island Coastal Institute, the University of Connecticut (UConn) AES (# CONS00971 ) and UConn's DelFavero Faculty Fellowship . We thank Andrew Boslett, Edson Okwelum and Patrick Prendergast for excellent research ass…					Ackert, L., Charupat, N., Church, B., Deaves, R., An experimental examination of the house money effect in a multi-period setting (2006) Exp. Econ., 9, pp. 5-16; Arnold, J.G., Moriasi, D.N., Gassman, P.W., Abbaspour, K.C., White, M.J., Srinivasan, R., Santhi, C., Jha, M., SWAT: model use, calibration, and validation (2012) Trans. ASABE, 55 (4), pp. 1491-1508; Bagnoli, M., McKee, M., Voluntary con…	Uchida, E.; 216 Coastal Institute, 1 Greenhouse Road, United States; email: euchida@uri.edu			Elsevier B.V.					9218009		ECECE		English	Ecol. Econ.	Article	Final	All Open Access, Green
Bujnovský R.	56549019600;	Estimation of benefits from the actual use of inland water ecosystem services in the Slovak Republic	Include	no	2018	Ekologia Bratislava	37	3		201	218		3	10.2478/eko-2018-0017	https://www.scopus.com/inward/record.uri?eid=2-s2.0-85058314053&doi=10.2478%2feko-2018-0017&partnerID=40&md5=f37eaebb70a2722fedaec3c77a0d6a1d	Water Research Institute, Nábr. Arm. Gen. L. Svobodu 5, Bratislava, 812 49, Slovakia	Bujnovský, R., Water Research Institute, Nábr. Arm. Gen. L. Svobodu 5, Bratislava, 812 49, Slovakia	The primary aim of the article is to obtain an overview of benefits from the actual use of inland water ecosystem services (ESSs) in Slovakia. The evaluation, which includes both surface water and groundwater, is primarily focused on demand side. Methods for assessing the benefits of the most prevalent ESSs, designated by Common International Classification of Ecosystem Services (CICES classifica…	Benefits; Ecosystem services; Evaluation methods; Groundwater; Inland waters; Surface waters	basin management; ecosystem service; estimation method; groundwater; river basin; surface water; territory; Slovakia												Austin, D., Cerman, G., Heywood, T., Marshall, R., Refling, K., Van Patter, L., (2012) Valuing Natural Capital and Ecosystem Services, , Ontario: University of Guelph; Bechtel, R.B., Churchman, A., (2002) Handbook of Environmental Psychology, , New York: J. Wiley & Sons, Inc; Boyd, J., Banzhaf, S., What are ecosystem services? The need for standardized environmental accounting units (2007) Ecolog…	Bujnovský, R.; Water Research Institute, Nábr. Arm. Gen. L. Svobodu 5, Slovakia; email: radoslav.bujnovsky@vuvh.sk			Sciendo					1335342X		EOLOE		English	Ekol. Bratislava	Article	Final	All Open Access, Gold
Zhu L., Guan S.P.	57203343972;57202893589;	Ecological Assessment of University Campus' Waterfront Landscape: With Guangzhou Higher Education Mega Center as a Case	Exclude	-	2018	IOP Conference Series: Earth and Environmental Science	167	1	12025				2	10.1088/1755-1315/167/1/012025	https://www.scopus.com/inward/record.uri?eid=2-s2.0-85051349220&doi=10.1088%2f1755-1315%2f167%2f1%2f012025&partnerID=40&md5=e08b21766c7a90894cbf5f0311ea86c3	South China University of Technology, Guangzhou, China	Zhu, L., South China University of Technology, Guangzhou, China; Guan, S.P., South China University of Technology, Guangzhou, China	In recently years, the establishment of university campus has been on a rise, but the campus ecology is confronted with unprecedented challenges. Campus waterscape is one of the most important part of campus ecological system. The implementation of ecological design principle has been an important issue of planning programming. Besides, the current situation of campus ecology is worth being focus…		Analytic hierarchy process; Ecodesign; Ecosystems; Hydrogeology; Analytic hierarchy process (ahp); Current situation; Ecological environments; Ecological systems; Field investigation; Good ecological environments; Sustainable landscape; University campus; Sustainable development					Fundamental Research Funds for the Central Universities: XMS17	The work is upported by “the Fundamental Research Funds for the Central Universities” (project number: XMS17).						Mei, W., J. Based on the concept of ecological planning of the campus planning (2006) Journal of Shan Xi Building, 2, pp. 1-2. , 2; Mea, M., (2005) Ecosystems and Human Well-being: Wetlands and Water Synthesis, , (Washington DC: World resources institute); Jieqiong, W., Qi, Z., (2015) J GIS-based Eco-services Evaluation Model for Evaluating the Physical Form of Urban Green Infrastructure. Landsca…	Guan, S.P.; South China University of TechnologyChina; email: 274392154@qq.com	Eguchi K.QuanrudTakagi H.		Institute of Physics Publishing	2018 8th International Conference on Environment Science and Engineering, ICESE 2018	11 March 2018 through 13 March 2018		138330	17551307				English	IOP Conf. Ser. Earth Environ. Sci.	Conference Paper	Final	All Open Access, Bronze
Khan I., Zhao M.	57201022908;54410096900;	Water resource management and public preferences for water ecosystem services: A choice experiment approach for inland river basin management	Include	no	2019	Science of the Total Environment	646			821	831		35	10.1016/j.scitotenv.2018.07.339	https://www.scopus.com/inward/record.uri?eid=2-s2.0-85050645150&doi=10.1016%2fj.scitotenv.2018.07.339&partnerID=40&md5=7c6790a5978c019c9fb4b9f3dd634b95	College of Economics & Management, Northwest A&F University, 3 Taicheng Road, Yangling, 712100, China	Khan, I., College of Economics & Management, Northwest A&F University, 3 Taicheng Road, Yangling, 712100, China; Zhao, M., College of Economics & Management, Northwest A&F University, 3 Taicheng Road, Yangling, 712100, China	The concept of ecosystem services provides a valuable approach for linking humans and nature and for supporting the protection of natural ecosystems. River water services, which influence public health and daily routines, have both social and ecological benefits to a surrounding area. However, river networks and their services have suffered extensive destruction due to urbanization and industrial…	Assessment of river ecosystem; Choice experiment; Mixed logit model; Multinomial logit model; Willingness to pay	Economic and social effects; Hydrogeology; Rivers; Water management; Water quality; Water supply systems; Choice experiments; Mixed logit models; Multinomial logit model; River ecosystem; Willingness to pay; Ecosystems; river water; water; ecosystem service; logit analysis; river basin; river management; river system; water management; water quality; willingness to pay; adult; aged; analytic meth…		water, 7732-18-5; Water			15ZDA052	The authors extend their sincere thanks to the editors of this journal and the two anonymous reviewers for their valuable comments and suggestions that have significantly improved the manuscript. The survey was sponsored by a major project supported by National Natural Social Science Foundation of China (No. 15ZDA052 ).						Alcamo, J., Ecosystems and Human Well-Being: A Framework for Assessment (2003), Island Press Washington, DC, USA; Allan, D., Erickson, D., Fay, J., The influence of catchment land use on stream integrity across multiple spatial scales (1997) Freshw. Biol., 37, pp. 149-161; Álvarez-Farizo, B., Hanley, N., Barberán, R., Lázaro, A., Choice modeling at the “market stall”: individual versus collective…	Khan, I.; College of Economics & Management, 3 Taicheng Road, China; email: imran@aup.edu.pk			Elsevier B.V.					489697		STEVA	30064108	English	Sci. Total Environ.	Article	Final
Wang Y., Zhao J., Fu J., Wei W.	57203135080;57190214513;56530030800;56464565300;	Effects of the Grain for Green Program on the water ecosystem services in an arid area of China—Using the Shiyang River Basin as an example	Exclude	-	2019	Ecological Indicators	104			659	668		33	10.1016/j.ecolind.2019.05.045	https://www.scopus.com/inward/record.uri?eid=2-s2.0-85065986865&doi=10.1016%2fj.ecolind.2019.05.045&partnerID=40&md5=593c693f9a3cd8035eb835c98365a2ed	College of Geography and Environment Science, Northwest Normal University, Lanzhou, 730070, China	Wang, Y., College of Geography and Environment Science, Northwest Normal University, Lanzhou, 730070, China; Zhao, J., College of Geography and Environment Science, Northwest Normal University, Lanzhou, 730070, China; Fu, J., College of Geography and Environment Science, Northwest Normal University, Lanzhou, 730070, China; Wei, W., College of Geography and Environment Science, Northwest Normal Un…	The Grain for Green Program (GFGP) is one of the largest land restoration/afforestation and one of the most ambitious ecosystem conservation programmes in the world; the programme has altered the land-use pattern and exerted a significant influence on the ecosystem services. Water ecosystem services are important for arid and semiarid China, however, few of the researchers tried to quantify the e…	Arid area of China; Grain-for-Green Program; InVEST model; Water conservation; Water yield	Arid regions; Economic and social effects; Forestry; Hydrogeology; Land use; Rivers; Water conservation; Watersheds; Arid area; Ecosystem services; Forest and grassland; Grain for greens; Shiyang river basins; Sustainable provision; Valuation of ecosystem services; Water yield; Ecosystems; arid region; ecosystem service; grassland; land use planning; numerical model; quantitative analysis; trade-…					National Natural Science Foundation of China, NSFC: 41661084	This research was supported by National Natural Science Foundation of China ( 41661084 ).						Brauman, K.A., Daily, G.C., Duarte, T.K., Mooney, H.A., The nature and value of ecosystem services: an overview highlighting hydrologic services (2007) Annu. Rev. Environ. Resour., 32, pp. 67-98; Canqiang, Z., Wenhua, L., Biao, Z., Moucheng, L., Water yield of Xitiaoxi river basin based on InVEST modeling (2012) J. Resour. Ecol., 3, pp. 50-54; Cao, S., Chen, L., Yu, X., Impact of China's grain fo…	Wang, Y.; College of Geography and Environment Science, China; email: wyc18894017342@163.com			Elsevier B.V.					1470160X				English	Ecol. Indic.	Article	Final
Aznar-Sánchez J.A., Velasco-Muñoz J.F., Belmonte-Ureña L.J., Manzano-Agugliaro F.	36670826300;56964517000;57191489504;56416637600;	The worldwide research trends on water ecosystem services	Include	no	2019	Ecological Indicators	99			310	323		31	10.1016/j.ecolind.2018.12.045	https://www.scopus.com/inward/record.uri?eid=2-s2.0-85059059426&doi=10.1016%2fj.ecolind.2018.12.045&partnerID=40&md5=fd350d57292fcc422e17aae7d4167638	Department of Economy and Business, Research Centre CIAIMBITAL and CAESCG, University of Almería, Almería, 04120, Spain; Department of Engineering, University of Almería, Almería, 04120, Spain	Aznar-Sánchez, J.A., Department of Economy and Business, Research Centre CIAIMBITAL and CAESCG, University of Almería, Almería, 04120, Spain; Velasco-Muñoz, J.F., Department of Economy and Business, Research Centre CIAIMBITAL and CAESCG, University of Almería, Almería, 04120, Spain; Belmonte-Ureña, L.J., Department of Economy and Business, Research Centre CIAIMBITAL and CAESCG, University of Alme…	In recent decades, the scarcity of water resources, the deterioration of aquatic ecosystems and associated repercussions for other ecosystems have become major global challenges. In this context, research on water ecosystem services has become increasingly important. The objective of this work is to analyse the evolution of this line of research worldwide for the period 1998–2017. A bibliometric …	Bibliometric analysis; Ecosystem services; Scientific research; Scopus; Water	Binary alloys; Biodiversity; Climate change; Deterioration; Economic analysis; Hydrogeology; International cooperation; Potassium alloys; Sustainable development; Uranium alloys; Water; Water quality; Water resources; Agricultural ecosystems; Bibliometric analysis; Chinese Academy of Sciences; Ecosystem services; International collaborations; Scientific researches; Scopus; Sustainable management;…					Ministerio de Economía y Competitividad, MINECO; European Regional Development Fund, FEDER: ECO2017-82347-P	This work has been partially supported by the Spanish Ministry of Economy and Competitiveness and the European Regional Development Fund by means of the research project ECO2017-82347-P, and by the Research Plan of the University of Almería through a Predoctoral Contract to Juan F. Velasco Muñoz. This paper was developed during the research stay by José A. Aznar-Sánchez at the Humboldt-Universitä…	This work has been partially supported by the Spanish Ministry of Economy and Competitiveness and the European Regional Development Fund by means of the research project ECO2017-82347-P, and by the Research Plan of the University of Almería through a Predoctoral Contract to Juan F. Velasco Muñoz. This paper was developed during the research stay by José A. Aznar-Sánchez at the Humboldt-Universitä…					Alamgir, M., Turton, S.M., Campbell, M.J., Macgregor, C.J., Pert, P.L., Spatial congruence and divergence between ecosystem services and biodiversity in a tropical forested landscape (2018) Ecol. Ind., 93, pp. 173-182; Aleixandre-Benavent, R., Aleixandre-Tudó, J.L., Castelló-Cogollos, L., Aleixandre, J.L., Trends in global research in deforestation. A bibliometric analysis (2018) Land Use Pol., 7…	Manzano-Agugliaro, F.; Department of Engineering, Spain; email: fmanzano@ual.es			Elsevier B.V.					1470160X				English	Ecol. Indic.	Review	Final
Ferraz S.F.D.B., Rodrigues C.B., Garcia L.G., Alvares C.A., Lima W.D.P.	6507946980;55469664200;57210896260;14071150700;6506682186;	Effects of Eucalyptus plantations on streamflow in Brazil: Moving beyond the water use debate	Exclude	-	2019	Forest Ecology and Management	453		117571				19	10.1016/j.foreco.2019.117571	https://www.scopus.com/inward/record.uri?eid=2-s2.0-85071780669&doi=10.1016%2fj.foreco.2019.117571&partnerID=40&md5=6b7361313452db5425c9644719bf462c	Departamento de Ciências Florestais, Escola Superior de Agricultura “Luiz de Queiroz”, ESALQ, Av. Pádua Dias, 11, Piracicaba, SP, Brazil; Prática Socioambiental, Rua Capitão Alberto Aguiar Weissohn, 337, GuararemaSP, Brazil; IPEF – Forestry Science and Research Institute, Via Comendador Pedro Morganti, Piracicaba, SP 3500, Brazil	Ferraz, S.F.D.B., Departamento de Ciências Florestais, Escola Superior de Agricultura “Luiz de Queiroz”, ESALQ, Av. Pádua Dias, 11, Piracicaba, SP, Brazil; Rodrigues, C.B., Prática Socioambiental, Rua Capitão Alberto Aguiar Weissohn, 337, GuararemaSP, Brazil; Garcia, L.G., IPEF – Forestry Science and Research Institute, Via Comendador Pedro Morganti, Piracicaba, SP 3500, Brazil; Alvares, C.A., IP…	Eucalyptus plantations play an important role in the Brazilian economy, and they are commonly associated with their high water use, which may have negative impacts on water availability for other users. As short rotation Eucalyptus plantations expand in South America, there is an urgent need to understand their effects on streamflow. This study analyzes water use by Eucalyptus plantations in Braz…	Experimental catchment; Fast-wood plantation; Hydrosolidarity; Sustainability; Water availability	Ecosystems; Forestry; Hydrogeology; Runoff; Stream flow; Sustainable development; Annual water yields; Eucalyptus plantations; Experimental catchments; Exponential models; Hydrosolidarity; Precipitation data; Water availability; Wood plantations; Water supply; catchment; dicotyledon; forest management; plantation forestry; precipitation (climatology); runoff; streamflow; sustainability; water ava…					Fundação de Amparo à Pesquisa do Estado de São Paulo, FAPESP: 2013/13243-9, 2013/22679-5; Conselho Nacional de Desenvolvimento Científico e Tecnológico, CNPq: 307395/2015-4, 337395/2015-4	The authors thank FAPESP ( 2013/22679-5 and 2013/13243-9 ) and CNPq ( 337395/2015-4 and 307395/2015-4 ). They are also grateful to the entire staff from the University of São Paulo at the Itatinga Experimental Station.	Most of the results in this paper are based on work conducted as part of the Cooperative Research Program between IPEF and Brazilian forest companies (PROMAB). This project depends on the participation IPEF and of numerous employees and assistants of the participating companies; we would like to thank them all for their valuable contributions. The authors thank FAPESP (2013/22679-5 and 2013/13243…					Almeida, A.C., Smethurst, P.J., Siggins, A., Cavalcante, R.B.L., Borges, N., Quantifying the effects of Eucalyptus plantations and management on water resources at plot and catchment scales (2016) Hydrol. Process., 30, pp. 4687-4703; Almeida, A.C., Soares, J.V., Landsberg, J.J., Rezende, G.D., Growth and water balance of Eucalyptus grandis hybrid plantations in Brazil during a rotation for pulp p…	Ferraz, S.F.D.B.; Departamento de Ciências Florestais, Av. Pádua Dias, 11, Brazil; email: silvio.ferraz@usp.br			Elsevier B.V.					3781127		FECMD		English	For. Ecol. Manage.	Article	Final
Peng J., Wang A., Luo L., Liu Y., Li H., Hu Y., Meersmans J., Wu J.	36663802100;56729516000;57204432620;55994329700;57196354021;57190665224;24399409600;35265605900;	Spatial identification of conservation priority areas for urban ecological land: An approach based on water ecosystem services	Include	no	2019	Land Degradation and Development	30	6		683	694		17	10.1002/ldr.3257	https://www.scopus.com/inward/record.uri?eid=2-s2.0-85060763614&doi=10.1002%2fldr.3257&partnerID=40&md5=432ed1cc9608e6c6102d1ed275484780	Laboratory for Earth Surface Processes, Ministry of Education, College of Urban and Environmental Sciences, Peking University, Beijing, 100871, China; Key Laboratory for Environmental and Urban Sciences, School of Urban Planning & Design, Shenzhen Graduate School, Peking University, Shenzhen, 518055, China; No.3 Planning Institute, Guangdong Urban & Rural Planning and Design Institute, Guangzhou,…	Peng, J., Laboratory for Earth Surface Processes, Ministry of Education, College of Urban and Environmental Sciences, Peking University, Beijing, 100871, China; Wang, A., Key Laboratory for Environmental and Urban Sciences, School of Urban Planning & Design, Shenzhen Graduate School, Peking University, Shenzhen, 518055, China, No.3 Planning Institute, Guangdong Urban & Rural Planning and Design I…	How to effectively prevent land degradation and ecosystem deterioration in the process of urbanization has been the focus of land degradation researches in urban areas. Urban ecological land can be defined as the natural base on which a city relies to ecologically survive. It closely links the social economy with the natural eco-environment, providing an important integrated approach to resolve t…	conservation priority areas; spatial identification; urban ecological land; water ecosystem services; Zhuhai City, China	Deterioration; Economics; Fish ponds; Hydrogeology; Sustainable development; Water conservation; Conservation priorities; Ecological sensitivity; Ecological sustainability; Integrated approach; Natural ecosystem; Research questions; Water ecosystems; Zhuhai City, China; Ecosystems; ecosystem service; land degradation; land management; nature conservation; spatial analysis; sustainability; urban a…					National Natural Science Foundation of China, NSFC: 41271195	This research was financially supported by the National Natural	This research was financially supported by the National Natural Science Foundation of China (41271195).					Ajmal, M., Moon, G.W., Ahn, J.H., Kim, T.W., Investigation of SCS-CN and its inspired modified models for runoff estimation in South Korean watersheds (2015) Journal of Hydro-Environment Research, 9 (4), pp. 592-603. , https://doi.org/10.1016/j.jher.2014.11.003; Alberti, M., Modeling the urban ecosystem: A conceptual framework (1999) Environmental and Planning B, 26 (4), pp. 623-646. , https://do…	Peng, J.; Laboratory for Earth Surface Processes, China; email: jianpeng@urban.pku.edu.cn			John Wiley and Sons Ltd					10853278				English	Land Degrad. Dev.	Article	Final	All Open Access, Green
Lazo P.X., Mosquera G.M., McDonnell J.J., Crespo P.	56414453500;56414720200;7101838542;35306526500;	The role of vegetation, soils, and precipitation on water storage and hydrological services in Andean Páramo catchments	Exclude	-	2019	Journal of Hydrology	572			805	819		15	10.1016/j.jhydrol.2019.03.050	https://www.scopus.com/inward/record.uri?eid=2-s2.0-85063254526&doi=10.1016%2fj.jhydrol.2019.03.050&partnerID=40&md5=58b29d8533a9105f7a067f8e82d9ab04	Departamento de Recursos Hídricos y Ciencias Ambientales, Facultad de Ingeniería & Facultad de Ciencias Agropecuarias, Universidad de Cuenca, Av. 12 de Abril, Cuenca, Ecuador; Institute for Landscape Ecology and Resources Management (ILR), Research Centre for BioSystems, Land Use and Nutrition (IFZ), Justus Liebig University, Giessen, Germany; Global Institute for Water Security, University of Sa…	Lazo, P.X., Departamento de Recursos Hídricos y Ciencias Ambientales, Facultad de Ingeniería & Facultad de Ciencias Agropecuarias, Universidad de Cuenca, Av. 12 de Abril, Cuenca, Ecuador; Mosquera, G.M., Departamento de Recursos Hídricos y Ciencias Ambientales, Facultad de Ingeniería & Facultad de Ciencias Agropecuarias, Universidad de Cuenca, Av. 12 de Abril, Cuenca, Ecuador, Institute for Lands…	Understanding how tropical montane catchments store and release water, and the resulting water ecosystem services they provide is crucial for improving water resource management. But while research in high–elevation tropical environments has made progress in defining streamflow generation processes, we still lack fundamental knowledge regarding water storage characteristics of catchments. Here we…	Andean Páramo wetlands; Dynamic storage; Ecosystem services; Passive storage; Peatland; Water regulation	Digital storage; Ecosystems; Hydrogeology; Regression analysis; Soil moisture; Stream flow; Tropics; Vegetation; Water management; Water supply; Wetlands; Dynamic storage; Ecosystem services; Passive storages; Peatland; Water regulation; Runoff; catchment; ecosystem service; Histosol; landscape; peatland; precipitation (climatology); precipitation intensity; soil property; soil water; soil-vegeta…					Secretaría de Educación Superior, Ciencia, Tecnología e Innovación, SENESCYT	This manuscript is an outcome of the MSc Program in Ecohydrology of the University of Cuenca. We would like to thank INV Metals S.A. (Loma Larga Project) for the assistance in the logistics during the study period. The authors also want to thank Irene Cardenas for her support with the laboratory analyses and Franklin Marin for his support with the collection of soil samples for hydrophysical prop…						Allen, R., Pereira, L., Raes, D., Smith, M., Crop Evapotranspiration-Guidelines for Computing Crop Water Requirements-FAO Irrigation and Drainage Paper 56 (1998), FAO Rome; Amvrosiadi, N., Seibert, J., Grabs, T., Bishop, K., Water storage dynamics in a till hillslope: the foundation for modeling flows and turnover times (2017) Hydrol. Process., 31, pp. 4-14; Aparecido, L.M.T., Teodoro, G.S., Mosq…	Mosquera, G.M.; Departamento de Recursos Hídricos y Ciencias Ambientales, Av. 12 de Abril, Ecuador; email: Giovanny.mosquerar@ucuenca.edu.ec			Elsevier B.V.					221694		JHYDA		English	J. Hydrol.	Article	Final
Ferreira P., van Soesbergen A., Mulligan M., Freitas M., Vale M.M.	57210774318;56025473700;57208275038;35247827200;24171922500;	Can forests buffer negative impacts of land-use and climate changes on water ecosystem services? The case of a Brazilian megalopolis	Exclude	-	2019	Science of the Total Environment	685			248	258		12	10.1016/j.scitotenv.2019.05.065	https://www.scopus.com/inward/record.uri?eid=2-s2.0-85066473769&doi=10.1016%2fj.scitotenv.2019.05.065&partnerID=40&md5=fdb1b93d300aeee003c88b0bb8fc1ea5	Graduate Program in Energetic Planning, Alberto Luiz Coimbra Institute for Graduate Studies and Research in Engineering (COPPE), Federal University of Rio de Janeiro, Rio de Janeiro, Brazil; Department of Geography, King's College London, Bush House North East Wing. 30 Aldwych, London, WC2B 4BG, United Kingdom; UN Environment World Conservation Monitoring Centre, Cambridge, United Kingdom; Brazil…	Ferreira, P., Graduate Program in Energetic Planning, Alberto Luiz Coimbra Institute for Graduate Studies and Research in Engineering (COPPE), Federal University of Rio de Janeiro, Rio de Janeiro, Brazil; van Soesbergen, A., Department of Geography, King's College London, Bush House North East Wing. 30 Aldwych, London, WC2B 4BG, United Kingdom, UN Environment World Conservation Monitoring Centre,…	While the role of land-use conversion on water quality is reasonably understood, its role on water quantity is controversial. Climate change is also expected to impact water availability. Here we explore the interplay of hydrology, land-use change and climate change in one of the most populous urban areas in the world. We examined the potential of forests to buffer the negative impacts of land-us…	Forest cover; Land cover; Scenario modelling; São Paulo; Water quality; Water quantity	Ecosystems; Hydrogeology; Land use; Reforestation; Runoff; Water quality; Ecosystem services; Forest cover; Hydrological parameters; Land cover; Scenario modelling; Sustainable agricultural; Water availability; Water quantities; Climate change; climate change; ecosystem service; forest cover; future prospect; hydrological response; land cover; land use change; reforestation; water availability; w…					King's College London; Coordenação de Aperfeiçoamento de Pessoal de Nível Superior, CAPES: 001; Conselho Nacional de Desenvolvimento Científico e Tecnológico, CNPq	Funding: This work was supported by the Coordenação de Aperfeiçoamento de Pessoal de Nível Superior – Brasil (CAPES) [grant number 001 ]; King's College London and AmbioTEK Community Interest Company – United Kingdom; the National Institutes of Science and Technology (INCT) in Ecology, Evolution and Biodiversity Conservation (EECBIO) – Brazil; the Brazilian Network on Global Climate Change Resear…						ANA – Agência Nacional de Águas, Regiões Hidrográficas do Brasil: Edição Especial. Conjuntura dos Recursos Hídricos no Brasil (2015) Brasília, , (162 p.); ANA – Agência Nacional de Águas, Atlas Brasil – Abastecimento Urbano de Água. Panorama Nacional (2010), 1. , Engecorps/Cobrape Brasília (69 pp); ANA – Agência Nacional de Águas, Conjuntura dos Recursos Hídricos no Brasil: Informe 2014. Brasília…	Ferreira, P.; Graduate Program in Energetic Planning, Brazil; email: paulasferreiras@gmail.com			Elsevier B.V.					489697		STEVA	31176212	English	Sci. Total Environ.	Article	Final	All Open Access, Green
Bremer L.L., Wada C.A., Medoff S., Page J., Falinski K., Burnett K.M.	36612839300;57201620783;57210159553;57210543295;55911215100;7101850630;	Contributions of native forest protection to local water supplies in East Maui	Exclude	-	2019	Science of the Total Environment	688			1422	1432		9	10.1016/j.scitotenv.2019.06.220	https://www.scopus.com/inward/record.uri?eid=2-s2.0-85069693956&doi=10.1016%2fj.scitotenv.2019.06.220&partnerID=40&md5=97e0c7de957d662b53ba6981b8b24e5b	University of Hawai'i Economic Research Organization, University of Hawai'i at Mānoa, Honolulu, HI, United States; Water Resources Research Center, University of Hawai'i at Mānoa, Honolulu, HI, United States; Department of Economics, University of Hawai'i at Mānoa, Honolulu, HI, United States; The Nature Conservancy, Honolulu, HI, United States	Bremer, L.L., University of Hawai'i Economic Research Organization, University of Hawai'i at Mānoa, Honolulu, HI, United States, Water Resources Research Center, University of Hawai'i at Mānoa, Honolulu, HI, United States; Wada, C.A., University of Hawai'i Economic Research Organization, University of Hawai'i at Mānoa, Honolulu, HI, United States; Medoff, S., University of Hawai'i Economic Resear…	Tropical forests provide a suite of benefits including biodiversity, cultural value, and a range of ecosystem services. Globally, there is increasing interest in incentivizing native forest protection as a multi-benefit natural infrastructure strategy to secure clean and ample water supplies. In addition to conversion to agriculture and other non-forest land uses, non-native species invasion repr…	Conservation; Groundwater recharge; Hawai'i; Invasive species; Native forest; Natural infrastructure; Watershed management	Biodiversity; Conservation; Economics; Ecosystems; Land use; Reforestation; Soil conservation; Tropics; Water conservation; Water management; Water supply; Ground water recharge; Hawai'i; Invasive species; Native forests; Natural infrastructure; Watershed management; Recharging (underground waters); ground water; biodiversity; ecosystem service; environmental protection; groundwater resource; inv…					National Science Foundation, NSF: 1557349; Nature Conservancy, TNC	We thank The Nature Conservancy, Hawai'i, who funded this work and who provided input and comments throughout the process. In particular, we are grateful to Alison Cohan, Kerri Fay, Mark Fox, Trae Menard, Teresa Menard, Pat Bily, and Stephanie Tom for their contributions to scenario development, data compilation, and presentation of results. We also thank Tom Giambelluca for data used in the ET m…	We thank The Nature Conservancy , Hawai'i, who funded this work and who provided input and comments throughout the process. In particular, we are grateful to Alison Cohan, Kerri Fay, Mark Fox, Trae Menard, Teresa Menard, Pat Bily, and Stephanie Tom for their contributions to scenario development, data compilation, and presentation of results. We also thank Tom Giambelluca for data used in the ET …					Abell, R., Asquith, N., Boccaletti, G., Bremer, L., Chapin, E., Erickson-Quiroz, A., Higgins, J., Karres, N., Beyond the Source: The Environmental, Economic and Community Benefits of Source Water Protection (2017), Nat. Conserv Arlington, VA; Amato, D.W., Bishop, J.M., Glenn, C.R., Dulai, H., Smith, C.M., Impact of submarine groundwater discharge on marine water quality and reef biota of Maui (20…	Bremer, L.L.; University of Hawai'i Economic Research Organization, United States; email: lbremer@hawaii.edu			Elsevier B.V.					489697		STEVA	31726570	English	Sci. Total Environ.	Article	Final	All Open Access, Hybrid Gold
Springgay E., Ramirez S.C., Janzen S., Brito V.V.	57193267972;57211536393;57194688894;57211533096;	The forest-water nexus: An international perspective	Exclude	-	2019	Forests	10	10	915				9	10.3390/f10100915	https://www.scopus.com/inward/record.uri?eid=2-s2.0-85074325901&doi=10.3390%2ff10100915&partnerID=40&md5=84000314ebeb52ae8197bf59e056f02a	Food and Agriculture Organization of the United Nations (FAO), Rome, 00153, Italy; Environment and Human Security (UNU-EHS), United Nations University, Bonn, D-53113, Germany; Department of Forest Sciences, Luiz de Queiroz College of Agriculture, University of São Paulo (ESALQ-USP), Sao Paulo, CEP 13418-900, Brazil	Springgay, E., Food and Agriculture Organization of the United Nations (FAO), Rome, 00153, Italy; Ramirez, S.C., Food and Agriculture Organization of the United Nations (FAO), Rome, 00153, Italy; Janzen, S., Food and Agriculture Organization of the United Nations (FAO), Rome, 00153, Italy, Environment and Human Security (UNU-EHS), United Nations University, Bonn, D-53113, Germany; Brito, V.V., Fo…	Discussions on the relationships between forests and water have primarily focused on the biophysical nature of these relationships. However, as issues such as land degradation affect the ability of forests to provide water-related ecosystem services resulting in water insecurity, the human dimension of the forest-water nexus has become more evident. This has resulted in the identification of the …	Climate change; Forest and water policy; Forest hydrology; SDGs; Sustainability	Climate change; Ecosystems; Environmental protection; Hydrogeology; Planning; Sustainable development; Water management; Ecosystem services; Forest hydrologies; International perspective; International policies; Partial information; SDGs; Water interactions; Water policies; Forestry; climate change; ecosystem service; environmental policy; forest management; forestry policy; policy approach; sust…												Ellison, D., Morris, C.E., Locatelli, B., Sheil, D., Cohen, J., Murdiyarso, D., Gutierrez, V., Pokorny, J., Trees, forests and water: Cool insights for a hot world (2017) Glob. Environ. Chang, 43, pp. 51-61; Creed, I.F., van Noordwijk, M., (2018) Forest and Water on a Changing Planet: Vulnerability, Adaptation and Governance Opportunities: A Global Assessment Report, , International Union of Fore…	Springgay, E.; Food and Agriculture Organization of the United Nations (FAO)Italy; email: elaine.springgay@fao.org			MDPI AG					19994907				English	Forests	Article	Final	All Open Access, Gold
Ercoli F., Lefebvre F., Delangle M., Godé N., Caillon M., Raimond R., Souty-Grosset C.	56014186500;57211470913;57211473942;57211469198;57211475976;6602848788;57202436426;	Differing trophic niches of three French stygobionts and their implications for conservation of endemic stygofauna	Include	no	2019	Aquatic Conservation: Marine and Freshwater Ecosystems	29	12		2193	2203		7	10.1002/aqc.3227	https://www.scopus.com/inward/record.uri?eid=2-s2.0-85074077520&doi=10.1002%2faqc.3227&partnerID=40&md5=e1e3d2327b276f972834afc15dd48257	Institute of Agricultural and Environmental Sciences, Estonian University of Life Sciences, Tartu, Estonia; Department of Biological and Environmental Sciences, University of Jyväskylä, Jyväskylä, Finland; Vienne Nature/Poitou-Charentes Nature, Fontaine-le-Comte, France; Laboratoire Ecologie et Biologie des Interactions-UMR CNRS 7267, Université de Poitiers, Poitiers, France	Ercoli, F., Institute of Agricultural and Environmental Sciences, Estonian University of Life Sciences, Tartu, Estonia, Department of Biological and Environmental Sciences, University of Jyväskylä, Jyväskylä, Finland; Lefebvre, F., Vienne Nature/Poitou-Charentes Nature, Fontaine-le-Comte, France; Delangle, M., Vienne Nature/Poitou-Charentes Nature, Fontaine-le-Comte, France, Laboratoire Ecologie …	Groundwater ecosystems represent the greatest proportion of unfrozen freshwater on Earth and harbour high numbers of rare taxa with restricted distributions. Stygofaunal abundance, species richness, and ecology play essential roles in groundwater ecosystem services and functioning, as well as providing an important contribution to global biodiversity. However, as global depletion and contaminatio…	biofilms; endemic species; food chain; food sources; groundwater ecosystem; stable isotopes; trophic niches partitioning; vulnerable species	amphipod; biofilm; detritus; endemic species; food chain; freshwater ecosystem; groundwater resource; niche partitioning; rare species; stable isotope; trophic status; vulnerability; Caecosphaeroma burgundum; Gallasellus heilyi; Niphargus					Agence de l'Eau Adour-Garonne; Eesti Teadusagentuur: MOBJD29; Haridus- ja Teadusministeerium: IUT 21-2; Centre National de la Recherche Scientifique, CNRS	This study was funded by the CNRS (Centre National de la Recherche Scientifique, France) and by the University of Poitiers, France. The Foundation LISEA Biodiversit?, the Regional Council of Nouvelle-Aquitaine, the DREAL Nouvelle-Aquitaine, and the Agence de l'Eau Adour-Garonne also provided financial support for the field investigations. Further financial support was provided by the Estonian Min…						Anneser, B., Pilloni, G., Bayer, A., Lueders, T., Griebler, C., Einsiedl, F., Richters, L., High resolution analysis of contaminated aquifer sediments and groundwater — what can be learned in terms of natural attenuation? (2010) Geomicrobiology Journal, 27, pp. 130-142. , https://doi.org/10.1080/01490450903456723; Boulton, A.J., Chances and challenges in the conservation of groundwaters and their…	Ercoli, F.; Institute of Agricultural and Environmental Sciences, Estonia; email: fabio.ercoli@emu.ee			John Wiley and Sons Ltd					10527613		AQCOE		English	Aquatic Conserv. Mar. Freshw. Ecosyst.	Article	Final
Peng L.-C., Lin Y.-P., Chen G.-W., Lien W.-Y.	57204802782;26323001700;57208546850;35937644700;	Climate change impact on spatiotemporal hotspots of hydrologic ecosystem services: A case study of Chinan catchment, Taiwan	Include	no	2019	Water (Switzerland)	11	4	867				7	10.3390/w11040867	https://www.scopus.com/inward/record.uri?eid=2-s2.0-85065065220&doi=10.3390%2fw11040867&partnerID=40&md5=8410dbaa763e3425e2355629d8dcafc4	Department of Bioenvironmental Systems Engineering, National Taiwan University, Taipei, 10617, Taiwan	Peng, L.-C., Department of Bioenvironmental Systems Engineering, National Taiwan University, Taipei, 10617, Taiwan; Lin, Y.-P., Department of Bioenvironmental Systems Engineering, National Taiwan University, Taipei, 10617, Taiwan; Chen, G.-W., Department of Bioenvironmental Systems Engineering, National Taiwan University, Taipei, 10617, Taiwan; Lien, W.-Y., Department of Bioenvironmental Systems …	Hydrologic ecosystem services are greatly affected by the changing climate. In this study, the Integrated Valuation of Ecosystem Services and Tradeoffs (InVEST) model was used to quantify hydrologic ecosystem services. Five general circulation models (GCMs) and two representative concentration pathways (RCPs) were selected to estimate hydrologic ecosystem services. The Local Indicators of Spatial…	Climate change; Hotspots; Hydrologic ecosystem service; Impacts; InVEST	Ecosystems; Sediments; Climate change impact; Ecosystem services; General circulation model; Hotspots; Impacts; InVEST; Spatial associations; Valuation of ecosystem services; Climate change; annual variation; catchment; climate change; ecosystem service; general circulation model; hydrological change; spatial variation; spatiotemporal analysis; water yield; Taiwan					Ministry of Science and Technology, Taiwan, MOST	Funding: This research was funded by the Ministry of Science and Technology of Taiwan ROC, for financially supporting this research under Grant (No. NSC 103-2410-H-002-161-MY3).						Grafton, R.Q., Garrick, D., Manero, A., Do, T.N., The Water Governance Reform Framework: Overview and Applications to Australia, Mexico, Tanzania, USA and Vietnam (2019) Water, 11, p. 137; Crossman, N.D., Bryan, B.A., de Groot, R.S., Lin, Y.P., Minang, P.A., Land science contributions to ecosystem services (2013) Curr. Opin. Environ. Sustain, 5, pp. 509-514; Grizzetti, B., Lanzanova, D., Liquete,…	Lin, Y.-P.; Department of Bioenvironmental Systems Engineering, Taiwan; email: yplin@ntu.edu.tw			MDPI AG					20734441				English	Water	Article	Final	All Open Access, Gold, Green
Mortazavi S.A., Najafi Alamdarlo H., Zaghi Bijarbas M.	55682284900;56047933100;57202337247;	Estimating the eco-environmental value of damages caused by groundwater over drafting	Include	no	2019	International Journal of Environmental Science and Technology	16	7		3861	3868		6	10.1007/s13762-018-1808-6	https://www.scopus.com/inward/record.uri?eid=2-s2.0-85047933570&doi=10.1007%2fs13762-018-1808-6&partnerID=40&md5=39c6fd608b01e0e12b99cef94efdc1db	Tarbiat Modares University, Tehran, Iran	Mortazavi, S.A., Tarbiat Modares University, Tehran, Iran; Najafi Alamdarlo, H., Tarbiat Modares University, Tehran, Iran; Zaghi Bijarbas, M., Tarbiat Modares University, Tehran, Iran	Groundwater provides a lot of services to the environment as one of the components of the ecosystem, but its over drafting has led to a lot of environmental damage. Estimating the economic value of these damages is one of the important issues in the environmental economics. Accordingly, the purpose of this study was to evaluate the economic value of environmental damages to the landscape, nature,…	Choice experiment; Eco-environmental value; Ecosystem services; Groundwater protection	Animals; Biodiversity; Conservation; Economic analysis; Groundwater; Biodiversity conservation; Choice experiments; Eco-environmental; Ecosystem services; Environmental economics; Ground water protection; Stated preference method; Value of groundwaters; Ecosystems; biodiversity; conservation status; economic conditions; ecosystem service; environmental economics; environmental values; estimation …												Alamdarlo, H.N., Ahmadian, M., Khalilian, S., Application of stochastic dynamic programming in water allocation, case study: Latian dam (2014) World Appl Sci J, 30 (7), pp. 838-843; Asadfasfizadeh, N., MosanenMozafari, M., SabouhiSaboni, M., Determine the contribution of factors affecting the over drafting of groundwater resources (case study: Marvdasht County) (2014) Agric Econ, 8 (3), pp. 101-1…	Mortazavi, S.A.; Tarbiat Modares UniversityIran; email: samortazavi@modares.ac.ir			Center for Environmental and Energy Research and Studies					17351472				English	Int. J. Environ. Sci. Technol.	Article	Final
Vinten A., Kuhfuss L., Shortall O., Stockan J., Ibiyemi A., Pohle I., Gabriel M., Gunn I., May L.	7003372026;57118098800;52364769300;6504463826;55860398200;55521652400;57209467213;16411936000;57216907006;	Water for all: Towards an integrated approach to wetland conservation and flood risk reduction in a lowland catchment in Scotland	Exclude	-	2019	Journal of Environmental Management	246			881	896		4	10.1016/j.jenvman.2019.05.135	https://www.scopus.com/inward/record.uri?eid=2-s2.0-85067874161&doi=10.1016%2fj.jenvman.2019.05.135&partnerID=40&md5=92ddfef9ccfe8297effb494d897ef9d2	James Hutton Institute, Craigiebuckler, AberdeenAB15 8QH, United Kingdom; ENGEES, 1 Quai KochStrasbourg 67070, France; Centre for Ecology and Hydrology, Bush Estate, Penicuik, Midlothian, EH26 0QB, United Kingdom	Vinten, A., James Hutton Institute, Craigiebuckler, AberdeenAB15 8QH, United Kingdom; Kuhfuss, L., James Hutton Institute, Craigiebuckler, AberdeenAB15 8QH, United Kingdom; Shortall, O., James Hutton Institute, Craigiebuckler, AberdeenAB15 8QH, United Kingdom; Stockan, J., James Hutton Institute, Craigiebuckler, AberdeenAB15 8QH, United Kingdom; Ibiyemi, A., James Hutton Institute, Craigiebuckler…	Strategies for sustainable water resources management require integration of hydrological, ecological and socio-economic concerns. The “Water for all” project has sought to develop a multi-disciplinary science case for innovative management of water levels and flows in a lowland catchment in Scotland. Water demands of arable agriculture, protection from flood risk and conservation needs of lowlan…	Catchment management; Eco-hydrology; Hydraulic modelling; Nutrient enrichment; Socio-economic assessment	water; catchment; dredging; ecohydrology; flood control; hydrological modeling; integrated approach; lowland environment; nutrient enrichment; socioeconomic status; wetland management; Article; catchment; dredging; human; risk reduction; Scotland; steady state; tilting; trophic level; water management; water supply; wetland; ecosystem; environmental protection; flooding; risk reduction; Scotland;…		water, 7732-18-5			S100015-00; Scottish Environment Protection Agency, SEPA; Rural and Environment Science and Analytical Services Division, RESAS; Scottish Natural Heritage, SNH; Natural Environment Research Council, NERC	We thanks Rural & Environment Science & Analytical Services Division of the Scottish Government (SEFARI) project number S100015-00 for funding this work. We thank riparian owners in the upper Lunan catchment for access to land and water for sampling and monitoring, as well as for helpful ongoing discussions. and Natural Environment Research Council for flow data and public registry for abstractio…	We thanks Rural & Environment Science & Analytical Services Division of the Scottish Government (SEFARI) project number S100015-00 for funding this work. We thank riparian owners in the upper Lunan catchment for access to land and water for sampling and monitoring, as well as for helpful ongoing discussions. and Natural Environment Research Council for flow data and public registry for abstractio…					Acreman, M.C., Fisher, J., Stratford, C.J., Mould, D.J., Mountford, J.O., Hydrological science and wetland restoration: Some case studies from Europe (2007) Hydrol. Earth Syst. Sci., 11, pp. 158-169; Acreman, M.C., Blake, J.R., Booker, D.J., Harding, R.J., Reynard, N., Mountford, J.O., Stratford, C.J., A simple framework for evaluating regional wetland ecohydrological response to climate change w…	Vinten, A.; James Hutton Institute, Aberdeen, United Kingdom; email: andy.vinten@hutton.ac.uk			Academic Press					3014797		JEVMA	31261015	English	J. Environ. Manage.	Article	Final	All Open Access, Green
Lehmann A., Timoner P., Fasel M., Lacayo M., Ashraf Vaghefi S., Abbaspour K.C.	7202535857;57207458527;57191334052;36610450600;56639976800;6603958885;	SWATCH21: A project for linking eco-hydrologic processes and services to aquatic biodiversity at river and catchment levels	Include	no	2019	Ecohydrology and Hydrobiology	19	2		182	197		4	10.1016/j.ecohyd.2019.01.003	https://www.scopus.com/inward/record.uri?eid=2-s2.0-85062547622&doi=10.1016%2fj.ecohyd.2019.01.003&partnerID=40&md5=7e4f1ad3a2d794f62207a12f264b0eff	University of Geneva, Institute for Environmental Sciences, enviroSPACE Lab., Bd. Carl-Vogt 66, Geneva, CH-1205, Switzerland; University of Geneva, Department F.-A. Forel of Environmental and Aquatic Sciences, Bd. Carl-Vogt 66, Geneva, CH-1205, Switzerland; Eawag, Swiss Federal Institute of Aquatic Science and Technology, Ueberlandstrasse 133, Duebendorf, CH-8600, Switzerland	Lehmann, A., University of Geneva, Institute for Environmental Sciences, enviroSPACE Lab., Bd. Carl-Vogt 66, Geneva, CH-1205, Switzerland, University of Geneva, Department F.-A. Forel of Environmental and Aquatic Sciences, Bd. Carl-Vogt 66, Geneva, CH-1205, Switzerland; Timoner, P., University of Geneva, Institute for Environmental Sciences, enviroSPACE Lab., Bd. Carl-Vogt 66, Geneva, CH-1205, Sw…	The objective of the SWATCH21 project is to improve our understanding of eco-hydrologic services at the catchment level, and biodiversity at the river scale. Six research questions are proposed: (i) How can we improve the access to input data for hydrological and ecological modeling? (ii) What is the role of glacier and snow in modifying the hydrological services? (iii) How can we best assess hyd…	Biodiversity; Climate change; Ecosystem services; Landuse change; Modeling; Tradeoffs and synergies	aquatic community; biodiversity; climate change; ecohydrology; ecological modeling; ecosystem service; glacier; hydrological modeling; land use change; synergism; trade-off; Switzerland					Schweizerischer Nationalfonds zur Förderung der Wissenschaftlichen Forschung, SNF: 315230_173206	The authors wish to greatly acknowledge the funding of the Swiss National Science Foundation No. 315230_173206 .						Abbaspour, K.C., Rouholahnejad, E., Vaghefi, S., Srinivasan, R., Yang, H., Klove, B., A continental-scale hydrology and water quality model for Europe: calibration and uncertainty of a high-resolution large-scale SWAT model (2015) J. Hydrol., 524, pp. 733-752; Abbaspour, K.C., Yang, J., Maximov, I., Siber, R., Bogner, K., Mieleitner, J., Zobrist, J., Srinivasan, R., Modelling hydrology and water …	Lehmann, A.; University of Geneva, Bd. Carl-Vogt 66, Switzerland; email: anthony.lehmann@unige.ch			Elsevier B.V.					16423593		EHCYA		English	Ecohydrol. Hydrobiol.	Article	Final
Pan F., Choi W.	57192211342;8527614600;	A conceptual modeling framework for hydrologic ecosystem services	Exclude	-	2019	Hydrology	6	1	12				3	10.3390/hydrology6010012	https://www.scopus.com/inward/record.uri?eid=2-s2.0-85064598284&doi=10.3390%2fhydrology6010012&partnerID=40&md5=c9b4f1c29e162550087ed07626e76f6f	Department of Geography, University of Wisconsin-Milwaukee, Milwaukee, WI 53201, United States	Pan, F., Department of Geography, University of Wisconsin-Milwaukee, Milwaukee, WI 53201, United States; Choi, W., Department of Geography, University of Wisconsin-Milwaukee, Milwaukee, WI 53201, United States	Ecosystem services (ES) help people understand and deal with current environmental situations and problems, and ES-related research has been increasing recently. However, the quantitative evaluations of ES that can be easily understood by decision makers are still in development. Specifically, new methods are needed for hydrologic ES with the requirements of spatially and temporally explicit spec…	Conceptual framework; Ecosystem services modeling; Hydrologic modeling; Hydrological ecosystem services													De Groot, R.S., Alkemade, R., Braat, L., Hein, L., Willemen, L., Challenges in integrating the concept of ecosystem services and values in landscape planning, management and decision making (2010) Ecol. Complex, 7, pp. 260-272; (2005) Ecosystems and HumanWell-being: Biodiversity Synthesis, , World Resources Institute: Washington, DC, USA; Bagstad, K.J., Semmens, D.J., Waage, S., Winthrop, R., A c…	Pan, F.; Department of Geography, United States; email: fengpan@uwm.edu			MDPI Multidisciplinary Digital Publishing Institute					23065338				English	Hydrology	Article	Final	All Open Access, Gold, Green
Rambonilaza T., Neang M.	15832927600;57148212400;	Exploring the potential of local market in remunerating water ecosystem services in Cambodia: An application for endogenous attribute non-attendance modelling	Exclude	-	2019	Water Resources and Economics	25			14	26		3	10.1016/j.wre.2018.07.001	https://www.scopus.com/inward/record.uri?eid=2-s2.0-85050151014&doi=10.1016%2fj.wre.2018.07.001&partnerID=40&md5=2d0d0c81df68d3b148fafef7f23c51d9	Irstea, UR ETBX, 50 Avenue de Verdun, Cestas, F-33612, France; Faculty of Agricultural Economics and Rural Development, Royal University of Cambodia, Dangkor District, P.O Box 2696, Phnom Penh, Cambodia	Rambonilaza, T., Irstea, UR ETBX, 50 Avenue de Verdun, Cestas, F-33612, France; Neang, M., Faculty of Agricultural Economics and Rural Development, Royal University of Cambodia, Dangkor District, P.O Box 2696, Phnom Penh, Cambodia	Within South East Asia, certification and local market development may play an important role in incentivizing farmers to continue with nature-based solutions delivered by organic or traditional farming practices and avoid using environmentally detrimental production techniques. The purpose of this study is to use economic valuation in order to achieve an empirical understanding of local consumer…		certification; cultivation; econometrics; ecosystem service; experimental study; exploration; incentive; market development; numerical model; preference behavior; public goods; rice; valuation; water economics; Cambodia; Mekong Basin; Phnom Penh; Southeast Asia												Bottrell, D.G., Schoenly, K.G., Resurrecting the ghost of green revolutions past: the brown planthopper as a recurring threat to high-yielding rice production in tropical Asia (2012) J. Asia Pac. Entomol., 15, pp. 122-140; Ecobichon, D.J., Pesticide use in developing countries (2001) Toxicology, 160, pp. 27-33; Popp, J., Pető, K., Nagy, J., Pesticide productivity and food security. A review, Agro…	Rambonilaza, T.; Irstea, 50 Avenue de Verdun, France; email: tina.rambonilaza@irstea.fr			Elsevier B.V.					22124284				English	Water Resour. Econ.	Article	Final
Pan F., Choi W.	57192211342;8527614600;	Impacts of climate change and urban expansion on hydrologic ecosystem services in the Milwaukee River basin	Exclude	-	2019	Climate	7	4	59				1	10.3390/cli7040059	https://www.scopus.com/inward/record.uri?eid=2-s2.0-85064664023&doi=10.3390%2fcli7040059&partnerID=40&md5=603cc31f195dc167be940b9b76fd2b06	Department of Geography, University of Wisconsin-Milwaukee, Milwaukee, WI 53201, United States	Pan, F., Department of Geography, University of Wisconsin-Milwaukee, Milwaukee, WI 53201, United States; Choi, W., Department of Geography, University of Wisconsin-Milwaukee, Milwaukee, WI 53201, United States	Land use/land cover (LULC) and climate changes could affect water quantity and quality and thus hydrologic ecosystem services (ES). However, studies of these impacts on hydrologic ES are limited by the current methods and techniques. We attempted to find out how the LULC and climate changes impact hydrologic ES at different temporal scales so that decision-makers can easily understand hydrologic …	Climate change; Conceptual framework; Hydrologic ecosystem services; LULC change													(2005) Ecosystems and HumanWell-being: Biodiversity Synthesis, , World Resources Institute: Washington, DC, USA; Guerry, A.D., Polasky, S., Lubchenco, J., Chaplin-Kramer, R., Daily, G.C., Griffin, R., Ruckelshaus, M., Elmqvist, T., Natural capital and ecosystem services informing decisions: From promise to practice (2015) Proc. Natl. Acad. Sci. USA, 112, pp. 7348-7355; Daily, G.C., Polasky, S., G…	Pan, F.; Department of Geography, United States; email: fengpan@uwm.edu			MDPI AG					22251154				English	Clim.	Article	Final	All Open Access, Gold, Green
Pradafitri W.S., Moersidik S.S.	57205209680;55340741400;	Potential of east flood canal as provider of drinking water ecosystem services for DKI Jakarta	Exclude	-	2019	IOP Conference Series: Earth and Environmental Science	306	1	12005					10.1088/1755-1315/306/1/012005	https://www.scopus.com/inward/record.uri?eid=2-s2.0-85070963546&doi=10.1088%2f1755-1315%2f306%2f1%2f012005&partnerID=40&md5=52452043cdc8e5e05b1a45cf3848c7d4	School of Environmental Science, University of Indonesia, 4 Salemba Street, Indonesia	Pradafitri, W.S., School of Environmental Science, University of Indonesia, 4 Salemba Street, Indonesia; Moersidik, S.S., School of Environmental Science, University of Indonesia, 4 Salemba Street, Indonesia	The increasing population and water pollution in DKI Jakarta by domestic waste causes raw water supply unfulfilled. The problem can be solved by utilizing one of the existing surface water in DKI Jakarta that is East Flood Canal (BKT). This research aims to analyze the quality, quantity, and continuity of East Canal Flood as water source for DKI Jakarta. The method used for water quality test is …		Ammonia; Ecosystems; Floods; Hydraulic structures; Hydrogeology; River pollution; Rivers; Sustainable development; Water quality; Water supply; Critical condition; Ecosystem services; Government regulation; National standard; Raw water supply; Water ecosystems; Water quality standard; Water quality tests; Potable water					Universitas Indonesia, UI	The authors are thankful to staff members of Balai Besar Wilayah Sungai Ciliwung Cisadane (BBWSCC). This Research is funded by the Grant of Indexed International Publication for Final Project of Students/Publikasi Terindeks Internasional Untuk Tugas Akhir Mahasiswa (PITTA) Universitas Indonesia 2018 no. UN2.R3.1/HKP.05.00/2018.						Arsyad, S., Rustiadi, E., (2008) Rescue of Soil, Water, and Environment, , (Bogor: Yayasan Obor Indonesia); (2010) Report on Achievement of the Millennium Development Goals Indonesia, , BAPPENAS; Jakarta Dki (bps) Statistics Of C.Bureau, (2015) Jakarta in Numbers 2015; Ciliwung Cisadane River Head Office (bbws C.C.)., (2013) Quality Control Study Water and Solid Waste on the BKT System; Coates, D…	Pradafitri, W.S.; School of Environmental Science, 4 Salemba Street, Indonesia; email: wednespradafitri@gmail.com	ParikesitSunardiJaegler A.Franco-Garcia L.Withaningsih S.Utama G.L.Supyandi D.Malik A.D.		IOP Publishing Ltd	3rd Conference on Sustainability Science 2018, CSS 2018	9 October 2018 through 10 October 2018		150585	17551307				English		Conference Paper	Final	All Open Access, Bronze
Robinne F.-N., Hallema D.W., Bladon K.D., Buttle J.M.	57103584500;55185256500;14059488400;54790577400;	Wildfire impacts on hydrologic ecosystem services in North American high-latitude forests: A scoping review	Include	no	2020	Journal of Hydrology	581		124360				19	10.1016/j.jhydrol.2019.124360	https://www.scopus.com/inward/record.uri?eid=2-s2.0-85075574049&doi=10.1016%2fj.jhydrol.2019.124360&partnerID=40&md5=9c4bab7b9155f65ab5308cb4f7b03b1d	Canadian Partnership for Wildland Fire Science, University of Alberta, Renewable Resources 751 General Services Building, Edmonton, Alberta T6G 2H1, Canada; Eastern Forest Environmental Threat Assessment Center, U.S. Department of Agriculture Forest Service Southern Research Station, Research Triangle Park, NC 27709, United States; Department of Forestry and Environmental Resources, North Carolin…	Robinne, F.-N., Canadian Partnership for Wildland Fire Science, University of Alberta, Renewable Resources 751 General Services Building, Edmonton, Alberta T6G 2H1, Canada; Hallema, D.W., Eastern Forest Environmental Threat Assessment Center, U.S. Department of Agriculture Forest Service Southern Research Station, Research Triangle Park, NC 27709, United States, Department of Forestry and Environ…	High-latitude forests of North America are characterized by their natural dependence on large and severe wildfires. However, these wildfires also pose a range of social, economic, and environmental risks, with growing concern regarding persistent effects on stream flow volume, seasonal timing of flow, water quality, aquatic ecosystem health, and downstream community drinking water treatment. Here…	Forest fires; Post-fire hydrology; Source watersheds; Water security	Aquatic ecosystems; Aquatic organisms; Deforestation; Fires; Health risks; Hydrochemistry; Potable water; Runoff; Sediment transport; Stream flow; Water quality; Water treatment; Watersheds; Environmental risks; Erosion and sediment transports; Forest fires; Geospatial technology; Management decisions; Post-fire; Water security; Watershed characteristics; Rivers; drinking water; ecosystem service…					U.S. Fish and Wildlife Service, USFWS; U.S. Forest Service, USFS; Arctic Landscape Conservation Cooperative; Canada First Research Excellence Fund, CFREF; Global Water Futures, GWF	Financial support for the publication of this work was provided by the Canadian Partnership for Wildland Fire Science as part of the project ?Boreal Water Futures? funded by the Global Water Futures program, Canada First Research Excellence Fund. Additional information is available at https://gwf.usask.ca/. Additional funding was provided by the South Atlantic Landscape Conservation Cooperative t…	Financial support for the publication of this work was provided by the Canadian Partnership for Wildland Fire Science as part of the project “Boreal Water Futures” funded by the Global Water Futures program, Canada First Research Excellence Fund . Additional information is available at https://gwf.usask.ca/ . Additional funding was provided by the South Atlantic Landscape Conservation Cooperative…					Abbott, B.W., Bishop, K., Zarnetske, J.P., Hannah, D.M., Frei, R.J., Minaudo, C., Chapin, F.S., Pinay, G., A water cycle for the Anthropocene (2019) Hydrol. Process., , In Press; Al Ibrahim, A., Patrick, R.J., Source water protection planning and management in metropolitan Canada: a preliminary assessment (2017) Water, 9, p. 497; (2006), Alaska Department of Fish and Game Our wealth maintained: a…
Báliková K., Červená T., Meo I.D., Vreese R.D., Deniz T., Mokaddem A.E., Kayacan B., Larabi F., Libiete Z., Lyubenova M., Malovrh S.P., Potočki O., Pelyukh O., Rugani B., Sarvasova Z., Šálka J., Stevanov M., Stojnic S., Jarský V., Vuletić D., Zahvoyska L., Paletto A.	57209663402;57192829722;57194702065;24605396400;57200226790;57195470285;55250337000;57215526583;56024208000;23990926600;6506250122;57200105444;57194717176;22986401100;8266444600;6507051935;51564886100;36841361400;57193723965;15069883500;24176030600;57225930124;	How do stakeholders working on the forest-water nexus perceive payments for ecosystem services?	Include	no	2020	Forests	11	1	12				12	10.3390/f11010012	https://www.scopus.com/inward/record.uri?eid=2-s2.0-85081058496&doi=10.3390%2ff11010012&partnerID=40&md5=3b58af7f24b0d20150f70530448da1a4	Department of Forest Economics and Management, Faculty of Forestry, Technical University in Zvolen, Zvolen, 960 01, Slovakia; Faculty of Forestry and Wood Sciences, Czech University of Life Sciences Prague, Suchdol, Prague, 165 00, Czech Republic; Consiglio per la ricerca in agricoltura e l'analisi dell'economia agraria (CREA), Agriculture and Environment Research Centre, Firenze, 50125, Italy; U…	Báliková, K., Department of Forest Economics and Management, Faculty of Forestry, Technical University in Zvolen, Zvolen, 960 01, Slovakia; Červená, T., Faculty of Forestry and Wood Sciences, Czech University of Life Sciences Prague, Suchdol, Prague, 165 00, Czech Republic; Meo, I.D., Consiglio per la ricerca in agricoltura e l'analisi dell'economia agraria (CREA), Agriculture and Environment Res…	Nowadays, great emphasis is placed on the relationship between forest and water because forests are considered as substantial sources of many water ecosystem services. The aim of this paper is to analyze the stakeholder opinions towards the relationship between forests and water and the potential development of water-related payments for ecosystem services (PES) schemes. The study is developed in…	Aquestionnaire survey; Cost Action; Forest management; Payments for water ecosystem services; Stakeholder opinions	Forestry; Hydrogeology; Surveys; Expert knowledge; Land managements; Mediterranean basin; Payments for ecosystem services; Payments for ecosystem services (PES); Public authorities; Stakeholder opinions; Water ecosystems; Ecosystems; ecosystem service; forest management; Internet; questionnaire survey; stakeholder; thematic mapping; water resource; Data; Eastern Europe; Ecosystems; Forestry; Medi…					009TU Z-4/2019, CZ.02.1.01/0.0/0.0/16_019/0000803, EVA4.0; 43061; European Cooperation in Science and Technology, COST; Agentúra na Podporu Výskumu a Vývoja, APVV: APVV-17-0232	This research was supported by the Slovak Research and Development Agency (APVV-17-0232), by the Cultural and Educational Agency of the Ministry of Education, Science, Research and Sport of the SR [grant number 009TU Z-4/2019], and by project EVA4.0 (grant No. CZ.02.1.01/0.0/0.0/16_019/0000803) financed by OPRDE. The empirical results were obtained in the framework of COST Action CA15206-PESFOR-W…						De Groot, R.S., Wilson, M.A., Boumans, R.M., A typology for the classification, description and valuation of ecosystem functions, goods and services (2002) Ecol. Econ., 41, pp. 393-408; Führer, E., Forest functions, ecosystem stability and management (2000) For. Ecol. Manag., 132, pp. 29-38; De Groot, R.S., Functions of Nature: Evaluation of Nature in Environmental Planning (1992), Management and…	Paletto, A.; Consiglio per la ricerca in agricoltura e l'analisi dell'economia agraria (CREA), Italy; email: alessandro.paletto@crea.gov.it			MDPI AG					19994907				English	Forests	Article	Final	All Open Access, Gold, Green
Pacetti T., Castelli G., Bresci E., Caporali E.	56611999500;57194380100;6508163320;57022108100;	Water Values: Participatory Water Ecosystem Services Assessment in the Arno River Basin, Italy	Include	no	2020	Water Resources Management	34	14		4527	4544		6	10.1007/s11269-020-02684-4	https://www.scopus.com/inward/record.uri?eid=2-s2.0-85092491897&doi=10.1007%2fs11269-020-02684-4&partnerID=40&md5=87bf488104d5036692989464f061a604	Department of Civil and Environmental Engineering (DICEA), Università degli Studi di Firenze, Via di S. Marta, 3, Firenze, 50139, Italy; Department of Agriculture, Food, Environment and Forestry (DAGRI), Università degli Studi di Firenze, Via San Bonaventura, 13, Firenze, 50145, Italy	Pacetti, T., Department of Civil and Environmental Engineering (DICEA), Università degli Studi di Firenze, Via di S. Marta, 3, Firenze, 50139, Italy; Castelli, G., Department of Agriculture, Food, Environment and Forestry (DAGRI), Università degli Studi di Firenze, Via San Bonaventura, 13, Firenze, 50145, Italy; Bresci, E., Department of Agriculture, Food, Environment and Forestry (DAGRI), Univer…	Water-related Ecosystem Services (WES), namely the multiple benefits that humans can obtain from water or water-related functions of an ecosystem, constitute a useful perspective to look at the overlap between biosphere and anthroposphere and to explore their sustainable coupling. On one hand, society acts as a driver of landscapes transformation, influencing the ecohydrological processes that un…	Ecosystem services; Low priority stakeholders; Participatory approach; River basin management; Water resources management	Decision making; Ecosystems; Environmental regulations; Hydrogeology; Water conservation; Watersheds; Assessment approaches; Biophysical assessments; Ecosystem services; Integrated Water Resources Management; Participatory process; Policy objectives; Water Framework Directives; Watershed planning process; Water resources; basin management; ecosystem service; participatory approach; resource manag…					Università degli Studi di Firenze; Regione Toscana	The present work was realized within the “WaterValues” Project, financed by the Tuscany Region (Italy) in the framework of the Regional Law for Participation 46/2013. Among others, the aims of the law are “to promote forms and instruments of democratic participation to guarantee and make effective the right to participate in the elaboration and formation of regional and local policies; to strengt…	This study was realized thanks to the funding provided by to Tuscany Region for local participatory processes (Regione Toscana- Delibera n. 36 del 30 agosto 2017). The authors want to thank Lorenzo Tilli and the Municipality of Figline e Incisa Valdarno for their willingness and dedication throughout the entire project implementation, and ReteSviluppo team (Bianca Cinelli, Marco Dugini, Carmelita…	This study was realized thanks to the funding provided by to Tuscany Region for local participatory processes (Regione Toscana- Delibera n. 36 del 30 agosto 2017). The authors want to thank Lorenzo Tilli and the Municipality of Figline e Incisa Valdarno for their willingness and dedication throughout the entire project implementation, and ReteSviluppo team (Bianca Cinelli, Marco Dugini, Carmelita…				Adem Esmail, B., Geneletti, D., Design and impact assessment of watershed investments: an approach based on ecosystem services and boundary work (2017) Environ Impact Assess Rev, 62, pp. 1-13; Adem Esmail, B., Geneletti, D., Albert, C., Boundary work for implementing adaptive management: a water sector application (2017) Sci Total Environ, 593, pp. 274-285; (2015) Piano Di Gestione Delle Acque de…	Pacetti, T.; Department of Civil and Environmental Engineering (DICEA), Via di S. Marta, 3, Italy; email: tommaso.pacetti@unifi.it			Springer Science and Business Media B.V.					9204741				English	Water Resour. Manage.	Article	Final	All Open Access, Hybrid Gold
Stubbington R., Acreman M., Acuña V., Boon P.J., Boulton A.J., England J., Gilvear D., Sykes T., Wood P.J.	23091974900;55405819500;23670461000;7103015441;35267971600;16678396600;7003626319;7003437552;56244624600;	Ecosystem services of temporary streams differ between wet and dry phases in regions with contrasting climates and economies	Include	no	2020	People and Nature	2	3		660	677		6	10.1002/pan3.10113	https://www.scopus.com/inward/record.uri?eid=2-s2.0-85102643085&doi=10.1002%2fpan3.10113&partnerID=40&md5=4b0fc550e07601c0c2a06a27f332672f	School of Science and Technology, Nottingham Trent University, Nottingham, United Kingdom; Centre for Ecology & Hydrology, Wallingford, United Kingdom; Catalan Institute for Water Research (ICRA), Girona, Spain; University of Girona, Girona, Spain; The Freshwater Biological Association, Cumbria, United Kingdom; School of Environmental and Rural Science, University of New England, Armidale, NSW, A…	Stubbington, R., School of Science and Technology, Nottingham Trent University, Nottingham, United Kingdom; Acreman, M., Centre for Ecology & Hydrology, Wallingford, United Kingdom; Acuña, V., Catalan Institute for Water Research (ICRA), Girona, Spain, University of Girona, Girona, Spain; Boon, P.J., The Freshwater Biological Association, Cumbria, United Kingdom; Boulton, A.J., School of Environm…	Temporary streams are dynamic ecosystems in which mosaics of flowing, ponded and dry habitats support high biodiversity of both aquatic and terrestrial species. Species interact within habitats to perform or facilitate processes that vary in response to changing habitat availability. A natural capital approach recognizes that, through such processes, the ‘natural assets’ of all ecosystems deliver…	aquatic–terrestrial ecosystem; dry river; dry stream; ecosystem services; intermittent rivers and ephemeral streams; natural capital; non-perennial river; temporary river						Natural Environment Research Council, NERC: NE/M005410/1; Australian Research Council, ARC: LP130100498	Ideas in this paper were developed during the preparation of , a Natural Capital Synthesis Report funded by a NERC Policy and Practice Impact Award as part of the Valuing Nature Programme (NERC grant reference NE/M005410/1). We thank Anita Weatherby and Val Woods at the Centre for Ecology & Hydrology, which holds the related award, for their support during preparation of the report. M.A. acknowle…	Ideas in this paper were developed during the preparation of The natural capital of temporary rivers, a Natural Capital Synthesis Report funded by a NERC Policy and Practice Impact Award as part of the Valuing Nature Programme (NERC grant reference NE/M005410/1). We thank Anita Weatherby and Val Woods at the Centre for Ecology & Hydrology, which holds the related award, for their support during p…					Acreman, M., Arthington, A.H., Colloff, M.J., Couch, C., Crossman, N.D., Dyer, F., Young, W., Environmental flows for natural, hybrid, and novel riverine ecosystems in a changing world (2014) Frontiers in Ecology and the Environment, 12, pp. 466-473. , https://doi.org/10.1890/130134; Acuna, V., Datry, T., Marshall, J., Barcelo, D., Dahm, C.N., Ginebreda, A., Palmer, M.A., Why should we care about…
Ávila-García D., Morató J., Pérez-Maussán A.I., Santillán-Carvantes P., Alvarado J., Comín F.A.	57218767471;8559679300;57218771368;57202643641;57208271937;14040023200;	Impacts of alternative land-use policies on water ecosystem services in the Río Grande de Comitán-Lagos de Montebello watershed, Mexico	Exclude	-	2020	Ecosystem Services	45		101179				5	10.1016/j.ecoser.2020.101179	https://www.scopus.com/inward/record.uri?eid=2-s2.0-85090206142&doi=10.1016%2fj.ecoser.2020.101179&partnerID=40&md5=54a0ac468eab154236d04e00a81b757e	UNESCO Chair on Sustainability, Polytechnic University of Catalonia (UPC), C/Colom 1, Terrassa, 08222, Spain; Facultad de Ciencias, Universidad Nacional Autónoma de México (UNAM), Ciudad Universitaria, Coyoacán, 04510, Mexico; Institute for Ethics and Transdisciplinary Sustainability Research, Leuphana University of Lüneburg, Scharnhorststraße 1, Lüneburg, 21335, Germany; Laboratorio Nacional de …	Ávila-García, D., UNESCO Chair on Sustainability, Polytechnic University of Catalonia (UPC), C/Colom 1, Terrassa, 08222, Spain; Morató, J., UNESCO Chair on Sustainability, Polytechnic University of Catalonia (UPC), C/Colom 1, Terrassa, 08222, Spain; Pérez-Maussán, A.I., Facultad de Ciencias, Universidad Nacional Autónoma de México (UNAM), Ciudad Universitaria, Coyoacán, 04510, Mexico; Santillán-C…	Land-cover degradation affects the ability of forests to provide water ecosystem services (ESw). This study explores the forest-water nexus and provides an overview of the water management related to potential hydrological impacts of land-use and land-cover change in the Río Grande de Comitán-Lagos de Montebello watershed in southeastern Mexico. A combination of methods recommended by the Toolkit…	Forest-water nexus; Land-use/land-cover change; Scenario analysis; Water provision; Water quality						King's College London; Consejo Nacional de Ciencia y Tecnología, CONACYT: 292745/440608; ARC Centre of Excellence in Cognition and its Disorders, CCD: 2018-U002	This research was supported by the Mexican National Council for Science and Technology ( CONACYT -Mexico) [ 292745/440608 ] and the Centre de Cooperació per al Desenvolupament-UPC (CCD) [2018-U002]. We thank Mark Mulligan (King’s College London and AmbioTEK Community Interest Company-UK) for the WaterWorld license (PSS). We are most grateful to Lagunas de Montebello National Park, National Commis…	This research was supported by the Mexican National Council for Science and Technology (CONACYT-Mexico) [292745/440608] and the Centre de Cooperaci? per al Desenvolupament-UPC (CCD) [2018-U002]. We thank Mark Mulligan (King's College London and AmbioTEK Community Interest Company-UK) for the WaterWorld license (PSS). We are most grateful to Lagunas de Montebello National Park, National Commission…					Alcocer, J., Merino-Ibarra, M., Oseguera, L.A., Escolero, O., Anthropogenic impacts on tropical karst lakes: “Lagunas de Montebello”, Chiapas (2018) Ecohydrology, 11, pp. 1-13; Alcocer, J., Oseguera, L.A., Sánchez, G., González, C.G., Martínez, J.R., González, R., Bathymetric and morphometric surveys of the Montebello Lakes (2016) Chiapas. J. Limnol., 75, pp. 56-65; Alvarado, J., Evaluación del t…	Ávila-García, D.; UNESCO Chair on Sustainability, C/Colom 1, Spain; email: daniela.avila@upc.edu			Elsevier B.V.					22120416				English	Ecosyst. Serv.	Article	Final
Decsi B., Vári Á., Kozma Z.	57211292928;8302273000;6602396133;	The effect of future land use changes on hydrologic ecosystem services: a case study from the Zala catchment, Hungary	Include	no	2020	Biologia Futura	71	4		405	418		4	10.1007/s42977-020-00032-6	https://www.scopus.com/inward/record.uri?eid=2-s2.0-85089767139&doi=10.1007%2fs42977-020-00032-6&partnerID=40&md5=3d27cedf8e007b983297bcf4dadc33f5	Department of Sanitary and Environmental Engineering, Budapest University of Technology and Economics, Műegyetem rakpart 3., K. building mf. 45/7, Budapest, 1111, Hungary; MTA Centre for Ecological Research, Institute of Ecology and Botany, Alkotmány u. 2-4, Vácrátót, 2163, Hungary	Decsi, B., Department of Sanitary and Environmental Engineering, Budapest University of Technology and Economics, Műegyetem rakpart 3., K. building mf. 45/7, Budapest, 1111, Hungary; Vári, Á., MTA Centre for Ecological Research, Institute of Ecology and Botany, Alkotmány u. 2-4, Vácrátót, 2163, Hungary; Kozma, Z., Department of Sanitary and Environmental Engineering, Budapest University of Techno…	Maintaining and, where possible, improving the ecological status of our water resources are of particular importance for the future. So, one of the main drivers of landscape design must be to protect our waters. In this study, we carried out an evaluation of four hydrologic ecosystem services (HES) in the Zala River catchment area, the largest tributary of Lake Balaton (more than half of the lake…	Filtration; Hydrologic ecosystem services; InVEST; Land use change; Trade-off	nitrogen; phosphorus; arable land; Article; atmospheric deposition; catchment area (hydrology); cropland; ecology; economic aspect; ecosystem; evapotranspiration; filtration; fluid balance; forest; grassland; Hungary; hydrology; lake; land use; pasture; precipitation; river basin; sediment; social status; soil erosion; surface runoff; urban area; vegetation; water quality; watershed		nitrogen, 7727-37-9; phosphorus, 7723-14-0			Budapesti Műszaki és Gazdaságtudományi Egyetem, BME	Open access funding provided by Budapest University of Technology and Economics. The authors would like to thank M?t? Kriszti?n Kardos, Zsolt Jol?nkai and Tam?s ?cs for their contribution.						Allen, R.G., Pereira, L.S., Raes, D., Smith, M., (1998) Crop evapotranspiration - guidelines for computing crop water requirements - FAO irrigation and drainage paper 56, , Food and Agriculture Organization of the United Nations, Rome; Bagstad, K.J., Semmens, D.J., Waage, S., Winthrop, R., A comparative assessment of decision-support tools for ecosystem services quantification and valuation (2013…	Decsi, B.; Department of Sanitary and Environmental Engineering, Műegyetem rakpart 3., K. building mf. 45/7, Hungary; email: decsi.bence@epito.bme.hu			Akademiai Kiado Rt.					26768615			34554455	English	Biol. Futura.	Article	Final	All Open Access, Hybrid Gold
Báliková K., Dobšinská Z., Paletto A., Sarvašová Z., Hillayová M.K., Štěrbová M., Výbošt'ok J., Šálka J.	57209663402;55279776000;57225930124;8266444600;57217631054;57188590713;57195486981;6507051935;	The design of the payments for water-related ecosystem services: What should the ideal payment in Slovakia look like?	Include	no	2020	Water (Switzerland)	12	6	1583				4	10.3390/W12061583	https://www.scopus.com/inward/record.uri?eid=2-s2.0-85087449611&doi=10.3390%2fW12061583&partnerID=40&md5=70cc029cac080c852e5a35413fe0e053	Faculty of Forestry, Department of Forest Economics and Management, Technical University in Zvolen, Zvolen, 96001, Slovakia; Forestry and Wood Research Centre, Council for Agricultural Research and Economics (CREA), Trento, 6-38123, Italy; Department of Forest Policy, Economics and Forest Management, National Forest Centre-Forest Research Institute Zvolen, Zvolen, 96001, Slovakia	Báliková, K., Faculty of Forestry, Department of Forest Economics and Management, Technical University in Zvolen, Zvolen, 96001, Slovakia; Dobšinská, Z., Faculty of Forestry, Department of Forest Economics and Management, Technical University in Zvolen, Zvolen, 96001, Slovakia; Paletto, A., Forestry and Wood Research Centre, Council for Agricultural Research and Economics (CREA), Trento, 6-38123,…	Water-related forest ecosystems services (WES) are vital to the functioning of the biosphere, society, and human well-being. In Slovakia, the active support of WES is provided by economic instruments of forest policy, while the market-based solution as payments for water-related services (PWS) is lacking. Starting from this point, the objective matter of the paper is to develop the payments for W…	Payments design in Slovakia; Payments for water ecosystem services; Stakeholders' opinions; Water ecosystem services	Forestry; Water management; Active supports; Design and implementations; Document analysis; Economic instruments; Ecosystem services; Forest ecosystem; Potential buyers; Public authorities; Ecosystems; design; economic activity; ecosystem function; ecosystem service; environmental economics; forest ecosystem; knowledge; nature conservation; stakeholder; water management; Slovakia					009TU Z-4/2019; 43061; European Cooperation in Science and Technology, COST; Agentúra na Podporu Výskumu a Vývoja, APVV: APVV-17-0232; Vedecká Grantová Agentúra MŠVVaŠ SR a SAV, VEGA: 1/0665/20	Funding: This research was supported by the Slovak Research and Development Agency (APVV-17-0232), by the Cultural and Educational Agency of the Ministry of Education, Science, Research and Sport of the SR [grant number 009TU Z-4/2019], and by VEGA project No. 1/0665/20—InnoWaFor: Innovation potential of payments for ecosystem services—“water and forests. “The empirical results were obtained in t…	This research was supported by the Slovak Research and Development Agency (APVV-17-0232), by the Cultural and Educational Agency of the Ministry of Education, Science, Research and Sport of the SR [grant number 009TU Z-4/2019], and by VEGA project No. 1/0665/20-InnoWaFor: Innovation potential of payments for ecosystem services-"water and forests. "The empirical results were obtained in the framew…					de Groot, R.S., Alkemade, R., Braat, L., Hein, L., Willemen, L., Challenges in integrating the concept of ecosystem services and values in landscape planning, management and decision making (2010) Ecol. Complex, 7, pp. 260-272; Costanza, R., de Groot, R., Braat, L., Kubiszewski, I., Fioramonti, L., Sutton, P., Farber, S., Grasso, M., Twenty years of ecosystem services: How far have we come and ho…	Báliková, K.; Faculty of Forestry, Slovakia; email: xbalikova@gmail.com			MDPI AG					20734441				English	Water	Article	Final	All Open Access, Gold
Berrouet L., Villegas-Palacio C., Botero V.	16300943200;36158776500;57195260571;	Vulnerability of Rural Communities to Change in an Ecosystem Service Provision: Surface water supply. A Case Study in the Northern Andes, Colombia	Exclude	-	2020	Land Use Policy	97		104737				3	10.1016/j.landusepol.2020.104737	https://www.scopus.com/inward/record.uri?eid=2-s2.0-85086562881&doi=10.1016%2fj.landusepol.2020.104737&partnerID=40&md5=45a4bd75e0a5e2f68359d734dd92013f	Escuela Ambiental, Facultad de Ingeniería, Universidad de Antioquia, Colombia; Departamento de Geociencias y Medio Ambiente – Facultad de Minas, Universidad Nacional de Colombia, Sede Medellín, Colombia	Berrouet, L., Escuela Ambiental, Facultad de Ingeniería, Universidad de Antioquia, Colombia; Villegas-Palacio, C., Departamento de Geociencias y Medio Ambiente – Facultad de Minas, Universidad Nacional de Colombia, Sede Medellín, Colombia; Botero, V., Departamento de Geociencias y Medio Ambiente – Facultad de Minas, Universidad Nacional de Colombia, Sede Medellín, Colombia	The understanding of how socio-ecological systems respond to environmental change is an essential issue in land use planning processes. Vulnerability analyses in the context of socio-ecological systems are a useful tool to this end. The study of social vulnerability seeks to analyze how the characteristics of beneficiaries of ecosystem services and their relation to the ecosystems, determine thei…	adaptive capacity; dependency; ecosystem services change; local scale; social vulnerability index; Socio-ecological system; substitution capacity	ecosystem service; environmental change; land use planning; river basin; rural population; service provision; surface water; vulnerability; water management; water resource; water supply; Andes; Colombia					Departamento Administrativo de Ciencia, Tecnología e Innovación (COLCIENCIAS)	This work was supported by (i) “Programa de investigación en la gestión del riesgo asociado con cambio climático y ambiental en cuencas hidrográficas’’, Convocatoria 543–2011 Colciencias and (ii) “808-2018 Proyectos de ciencia, tecnología e innovación y su contribución a los retos de país”- Colciencias .						Adger, W.N., Social Vulnerability to Climate Change and Extremes in Coastal Vietnam (1999) World Development, 27, pp. 249-269; Álvarez, C., Programa de gestión ambiental a partir de un índice de sostenibilidad de prácticas agrícolas y pecuarias en una microcuenca de montaña media (Tesis de Maestría en Medio Ambiente y Desarrollo) (2012), Universidad Nacional de Colombia Sede Medellín; Arcila Pulg…	Villegas-Palacio, C.; Departamento de Geociencias y Medio Ambiente – Facultad de Minas, Sede Medellín, Colombia; email: civilleg@unal.edu.co			Elsevier Ltd					2648377				English	Land Use Policy	Article	Final
Macharia D., Kaijage E., Kindberg L., Koech G., Ndungu L., Wahome A., Mugo R.	56176537000;57217020160;57217015925;57189339720;57209136831;57212659924;25029652500;	Mapping climate vulnerability of river basin communities in Tanzania to inform resilience interventions	Exclude	-	2020	Sustainability (Switzerland)	12	10	4102				3	10.3390/su12104102	https://www.scopus.com/inward/record.uri?eid=2-s2.0-85085765280&doi=10.3390%2fsu12104102&partnerID=40&md5=6c33364a409c3a631c9c7db352e9db2a	Regional Centre for Mapping of Resources for Development, Nairobi, 00618, Kenya; USAID Tanzania Water Resources Integration Development Initiative, Morogoro, 768, Tanzania	Macharia, D., Regional Centre for Mapping of Resources for Development, Nairobi, 00618, Kenya; Kaijage, E., USAID Tanzania Water Resources Integration Development Initiative, Morogoro, 768, Tanzania; Kindberg, L., USAID Tanzania Water Resources Integration Development Initiative, Morogoro, 768, Tanzania; Koech, G., Regional Centre for Mapping of Resources for Development, Nairobi, 00618, Kenya; N…	Increasing climate variability and change coupled with steady population growth is threatening water resources and livelihoods of communities living in theWami-Ruvu and Rufiji basins in Tanzania. These basins are host to three large urban centers, namely Dar es Salaam, Dodoma and Morogoro, with a combined total of more than 7 million people. Increased demand for ecosystem services from the availa…	Adaptation; Climate change; Climate stressors; Climate variability; Communities; GIS; Hotspots; Resilience; Vulnerability; Water resources	adaptive management; climate change; ecosystem service; local government; mapping method; nature-society relations; river basin; vulnerability; water resource; Tanzania					AID-621-TO-16-00003, AID-OAA-I-14-00068; AID-EGEE-IO-15-00002; United States Agency for International Development, USAID; National Bureau of Statistics of China, NBS; University of Dar es Salaam, UDSM	This research was supported by the United States Agency for International Development (USAID) through the SERVIR Eastern and Southern Africa project implemented by the Regional Centre for Mapping of Resources for Development (RCMRD) under the Cooperative Agreement No. AID-EGEE-IO-15-00002 and Tetra Tech Inc. through theWater and Development IDIQ (Contract No. AID-OAA-I-14-00068), Task Order No. A…	Funding: This research was supported by the United States Agency for International Development (USAID) through the SERVIR Eastern and Southern Africa project implemented by the Regional Centre for Mapping of Resources for Development (RCMRD) under the Cooperative Agreement No. AID-EGEE-IO-15-00002 and Tetra Tech Inc. through the Water and Development IDIQ (Contract No. AID-OAA-I-14-00068), Task O…					Chang'a, L.B., Kijazi, A.L., Luhunga, P.M., Ng'ongolo, H.K., Mtongori, H.I., Spatial and temporal analysis of rainfall and temperature extreme indices in Tanzania (2017) Atmos. Clim. Sci., 7, pp. 525-539; Chang'a, L.B., Yanda, P.Z., Ngana, J.O., Spatial and temporal analysis of recent climatological data in Tanzania (2010) J. Geogr. Reg. Plan., 3, pp. 044-065; Gebrechorkos, S.H., Hülsmann, S., Be…	Macharia, D.; Regional Centre for Mapping of Resources for DevelopmentKenya; email: dmacharia85@gmail.com			MDPI AG					20711050				English	Sustainability	Article	Final	All Open Access, Gold
Twisa S., Mwabumba M., Kurian M., Buchroithner M.F.	57211063391;57217179279;57218153296;6603433614;	Impact of land-use/land-cover change on drinking water ecosystem services in Wami River Basin, Tanzania	Include	no	2020	Resources	9	4	37				3	10.3390/RESOURCES9040037	https://www.scopus.com/inward/record.uri?eid=2-s2.0-85086666844&doi=10.3390%2fRESOURCES9040037&partnerID=40&md5=30cb15689acbe63436718bc6a45cfd26	Institute for Integrated Management of Material Fluxes and of Resources (UNU-FLORES), United Nations University, Ammonstrasse 74, Dresden, 01067, Germany; Institute for Cartography, Technische Universität Dresden, Dresden, 01062, Germany; School of Material, Energy, Water and Environmental Science (MEWES), Nelson Mandela African Institute of Science Technology (NM-AIST), P.O. Box 447, Arusha, Tan…	Twisa, S., Institute for Integrated Management of Material Fluxes and of Resources (UNU-FLORES), United Nations University, Ammonstrasse 74, Dresden, 01067, Germany, Institute for Cartography, Technische Universität Dresden, Dresden, 01062, Germany; Mwabumba, M., School of Material, Energy, Water and Environmental Science (MEWES), Nelson Mandela African Institute of Science Technology (NM-AIST), …	Land-use/land-cover changes are considered the dominant form of anthropogenic pressure on the environment, causing changes in ecosystem service patterns and affecting water supply services. Using the spatial econometric technique, we analysed the impact of land-use/land-cover change on water ecosystem services for domestic use upstream and downstream of the Wami River Basin. The results in terms …	Ecosystem services; Functionality; Land-use/land-cover; Spatial econometric; Water quality; Water quantity						Technische Universität Dresden, TUD	Funding: This research was funded by the Ministry of Water and the United Republic of Tanzania, and the APC was funded by Dresden University of Technology (TU Dresden).	Acknowledgments: We acknowledge support from UNU-FLORES and TU Dresden. Open Access Funding by the Publication Fund of the TU Dresden. The first author would like to acknowledge the financial support from the Government of the United Republic of Tanzania.					Lambin, E.F., Turner, B., Geist, H.J., Agbola, S.B., Angelsen, A., Bruce, J.W., Coomes, O.T., Folke, C., The causes of land-use and land-cover change: Moving beyond the myths (2001) Glob. Environ. Chang, 11, pp. 261-269; Twisa, S., Buchroithner, M.F., Seasonal and Annual Rainfall Variability and Their Impact on Rural Water Supply Services in the Wami River Basin, Tanzania (2019) Water, 11, p. 205…	Twisa, S.; Institute for Integrated Management of Material Fluxes and of Resources (UNU-FLORES), Ammonstrasse 74, Germany; email: twisa@unu.edu			MDPI AG					20799276				English	Resources	Article	Final	All Open Access, Gold
Garau E., Vila-Subiros J., Pueyo-Ros J., Palom A.R.	57219532613;56530791600;56200924700;57219534851;	Where do ecosystem services come from? Assessing and mapping stakeholder perceptions on water ecosystem services in the muga river basin (catalonia, spain)	Include	no	2020	Land	9	10	385	1	21		1	10.3390/land9100385	https://www.scopus.com/inward/record.uri?eid=2-s2.0-85093671514&doi=10.3390%2fland9100385&partnerID=40&md5=5aaeba9565cceecde900fabf22c00c5a	Department of Geography, Institute of Environment, IMA-UdG, University of Girona, Girona, 17071, Spain; ICRA, Catalan Institute for Water Research, Girona, 17003, Spain	Garau, E., Department of Geography, Institute of Environment, IMA-UdG, University of Girona, Girona, 17071, Spain; Vila-Subiros, J., Department of Geography, Institute of Environment, IMA-UdG, University of Girona, Girona, 17071, Spain; Pueyo-Ros, J., Department of Geography, Institute of Environment, IMA-UdG, University of Girona, Girona, 17071, Spain, ICRA, Catalan Institute for Water Research,…	Reductions in water availability and increasing rainfall variability are generating a narrative of growing competition for water in the Mediterranean basin. In this article, we explore the distribution and importance of water resources in the Muga River Basin (Catalonia, Spain) based on key stakeholders’ perceptions. We performed a sociocultural evaluation of the main water ecosystem services in …	Participatory mapping; River basin; Socioecological systems; Spatial analysis; Stakeholder values; Water ecosystem services						CSO2016-75740-P; Ministerio de Economía y Competitividad, MINECO	This research was funded by the financial support of the Spanish Ministry of Economy and Competitiveness through the project ?Incentives and barriers to water conservation in the tourism sector. Analysis and proposals for efficient water management? (CSO2016-75740-P). Acknowledgments: We thank all respondents of our study for their attention and time.	Funding: This research was funded by the financial support of the Spanish Ministry of Economy and Competitiveness through the project “Incentives and barriers to water conservation in the tourism sector. Analysis and proposals for efficient water management” (CSO2016-75740-P).					(2018) National Climate Change Vulnerability and Risk Assessments in Europe, 2018, , European Environment Agency. EEA Report No 1/2018; Publications Office of the European Union: Luxembourg, ISBN 978-92-9213-940-7; Masson-Delmotte, V., Zhai, P., Pörtner, H.-O., Roberts, D., Skea, J., Shukla, P.R., Pirani, A., Pidcock, R., (2018) Global Warming of 1.5◦C An IPCC Special Report, 265. , IPCC: Geneva,…	Garau, E.; Department of Geography, Spain; email: enrica.garau@udg.edu			MDPI AG					2073445X				English	Land	Article	Final	All Open Access, Gold, Green
Gordon B.L., Paige G.B., Miller S.N., Claes N., Parsekian A.D.	57202583139;7004252580;57213258537;57195918557;35799813500;	Field scale quantification indicates potential for variability in return flows from flood irrigation in the high altitude western US	Exclude	-	2020	Agricultural Water Management	232		106062				1	10.1016/j.agwat.2020.106062	https://www.scopus.com/inward/record.uri?eid=2-s2.0-85079131000&doi=10.1016%2fj.agwat.2020.106062&partnerID=40&md5=502466d72be26a8eea75d7e37f570c10	Water in the West, Woods Institute for the Environment, Stanford University, Stanford, CA, United States; Department of Ecosystem Science and Management, University of Wyoming, 1000 E. University Avenue, Laramie, WY, United States; Department of Geology and Geophysics, University of Wyoming, 1000 E University Ave LaramieWY, United States; Department of Civil Engineering, Aalborg University, Denma…	Gordon, B.L., Water in the West, Woods Institute for the Environment, Stanford University, Stanford, CA, United States, Department of Ecosystem Science and Management, University of Wyoming, 1000 E. University Avenue, Laramie, WY, United States, Graduate Program in Hydrologic Sciences, University of Nevada, 1664 North Virginia Street Reno, Reno, NV, United States; Paige, G.B., Department of Ecosy…	The assessment of hydrologic ecosystem services associated with flood irrigation in the western United States is particularly limited by a lack of data about return flows. Return flows, the portion of applied water that returns to adjacent surface and groundwater hydrologic systems during flood irrigation, may provide wildlife habitat, recharge aquifers, and supplement late season baseflows. To i…	Agricultural water; Irrigation efficiency; Return flows; Scintillometer	Animals; Aquifers; Decision making; Digital storage; Ecosystems; Floods; Groundwater resources; Hydrogeology; Irrigation; Vegetation; Water conservation; Agricultural water; Groundwater storage; Irrigation efficiency; Irrigation management; Return flow; Riparian vegetation; Scintillometer; Western United States; Recharging (underground waters); altitude; baseflow; equipment; field method; flood; …					EPS-1208909; Walton Family Foundation; Wyoming Water Research Program, University of Wyoming, WRP	This work was funded by the Wyoming Water Research Program , NSF-EPSCoR grant number EPS-1208909 , the Walton Family Foundation , and the Ishiyama Family Foundation .						Allen, R.G., Pereira, L.S., Raes, D., Smith, M., Crop Evapotranspiration-Guidelines for Computing Crop Water Requirements-FAO Irrigation and Drainage Paper 56 (1998), Fao Rome 300 (9); Beyrich, F., Bange, J., Hartogensis, O.K., Raasch, S., Braam, M., van Dinther, D., Gräf, D., Moene, A.F., Towards a validation of scintillometer measurements: the LITFASS-2009 experiment (2012) Boundary-Layer Meteo…	Gordon, B.L.; Water in the West, United States; email: blgordon@stanford.edu			Elsevier B.V.					3783774		AWMAD		English	Agric. Water Manage.	Article	Final
Pradit O., Kitchaicharoen J.	57222166949;8332755000;	Valuation of Benefits of Water Quality and Water Supply to Justify Payments for Ecosystem Services in Mae Sa Watershed, Chiang Mai, Thailand	Exclude	-	2020	Chiang Mai University Journal of Natural Sciences	19	4		648	664			10.12982/CMUJNS.2020.0042	https://www.scopus.com/inward/record.uri?eid=2-s2.0-85101786973&doi=10.12982%2fCMUJNS.2020.0042&partnerID=40&md5=4c2be66c552ecdcb855df1b0e19fc0eb	Agricultural Systems Management Program, Center for Agricultural Resource System Research, Faculty of Agriculture, Chiang Mai University, Chiang Mai, 50200, Thailand; Division of Agricultural Economics, Department of Agricultural Economy and Development, Faculty of Agriculture, Chiang Mai University, Chiang Mai, 50200, Thailand	Pradit, O., Agricultural Systems Management Program, Center for Agricultural Resource System Research, Faculty of Agriculture, Chiang Mai University, Chiang Mai, 50200, Thailand; Kitchaicharoen, J., Division of Agricultural Economics, Department of Agricultural Economy and Development, Faculty of Agriculture, Chiang Mai University, Chiang Mai, 50200, Thailand	For the past two decades, the concept of Payments for Ecosystem Services (PES) has been increasingly used as a market-based instrument to support natural resources and environmental management. Economic evaluation of ecosystem services is an important step for implementing a PES scheme as it helps provide information to stakeholders for their decision-making on payment. This paper aims to evaluat…	Choice experiment; Contingent valuation method; Damage cost avoided; Ecosystem services valuation; Payments for ecosystem services													(2007) The Mae Sa basin. Baseline water resources storage in the area, , http://www.water.go.th/basindata/maesa.index, Department of Water Resources; Enters, T., (1995) The economics of land degradation and resource conservation in Northern Thailand, pp. 90-110. , Institute of Southeast Asian Studies,Singapore; (2012) Ecosystem service valuation approaches: the economics of desertification, , Fed…	Pradit, O.; Agricultural Systems Management Program, Thailand; email: mimaggie38@hotmail.com			Chiang Mai University					16851994				English	Chiang Mai Univ. J. Nat. Sci.	Article	Final	All Open Access, Bronze
Bremer L.L., Wada C.A., Medoff S., Page J., Falinski K., Burnett K.M.	36612839300;57201620783;57210159553;57210543295;55911215100;7101850630;	Corrigendum to “Contributions of native forest protection to local water supplies in East Maui” [Sci. Total Environ. 688 (2019) 1422–1432] (Science of the Total Environment (2019) 688 (1422–1432), (S0048969719327937), (10.1016/j.scitotenv.2019.06.220))	Exclude	-	2020	Science of the Total Environment	737		140019					10.1016/j.scitotenv.2020.140019	https://www.scopus.com/inward/record.uri?eid=2-s2.0-85088670659&doi=10.1016%2fj.scitotenv.2020.140019&partnerID=40&md5=b7fc6d960e14670c38d79cf1b90ff7f6	University of Hawai'i Economic Research Organization, University of Hawai'i at Mānoa, Honolulu, HI, United States; Water Resources Research Center, University of Hawai'i at Mānoa, Honolulu, HI, United States; Department of Economics, University of Hawai'i at Mānoa, Honolulu, HI, United States; The Nature Conservancy, Honolulu, HI, United States	Bremer, L.L., University of Hawai'i Economic Research Organization, University of Hawai'i at Mānoa, Honolulu, HI, United States, Water Resources Research Center, University of Hawai'i at Mānoa, Honolulu, HI, United States; Wada, C.A., University of Hawai'i Economic Research Organization, University of Hawai'i at Mānoa, Honolulu, HI, United States; Medoff, S., University of Hawai'i Economic Resear…	The authors regret that the printed version of the above article contained an error in highlight # 4 and the abstract. The correct and final version follows. This error does not affect the accuracy of results presented in the manuscript. The authors would like to apologise for any inconvenience caused. Highlight #4 Forest conservation protected 50.9 to 122.3 million m3 of groundwater over 100 yea…		erratum													Bremer, L.L.; University of Hawai'i Economic Research Organization, United States; email: lbremer@hawaii.edu			Elsevier B.V.					489697		STEVA	32651011	English	Sci. Total Environ.	Erratum	Final
Yang X., Liu J.	57217028797;56649979200;	Assessment and valuation of groundwater ecosystem services: A case study of Handan City, China	Include	no	2020	Water (Switzerland)	12	5	1455					10.3390/w12051455	https://www.scopus.com/inward/record.uri?eid=2-s2.0-85085858465&doi=10.3390%2fw12051455&partnerID=40&md5=d0bc66a7b9c3954a3414abf644083a80	School ofWater Conservancy and Hydropower, Xi'an University of Technology, Xi'an, 710048, China; Water Resources Research Institute of Shandong province, Jinan, 250014, China	Yang, X., School ofWater Conservancy and Hydropower, Xi'an University of Technology, Xi'an, 710048, China, Water Resources Research Institute of Shandong province, Jinan, 250014, China; Liu, J., Water Resources Research Institute of Shandong province, Jinan, 250014, China	Groundwater is important for maintaining ecosystem balance. However, the ecological value of groundwater is always undervalued, while its value as water resources is emphasized. Thus, this paper divided the systematic valuation of groundwater-dependent ecosystems (GDEs) into three categories, and its services into four categories based on the utilization. In addition, a service valuation system w…	Economic value estimate; Ecosystem classification; Groundwater-dependent ecosystem; Indirect use value	Ecosystems; Groundwater; Assessment models; Ecological values; Ecosystem balance; Ecosystem services; Groundwater dependent ecosystems; Inherent value; Service values; Three categories; Groundwater resources; ecosystem service; environmental assessment; environmental indicator; groundwater; groundwater resource; valuation; water resource; China; Handan; Hebei					Department of Education of Hebei Province: QN2016233, ZD2016131; Hebei Provincial Department of Bureau of Science and Technology: 15227005D	Acknowledgments: This work was supported by the Science and Technology Project of Hebei Province (Grant No. 15227005D) and Scientific Research Project of Hebei Provincial Education Department (QN2016233, ZD2016131).	This research received no external funding. This work was supported by the Science and Technology Project of Hebei Province (Grant No. 15227005D) and Scientific Research Project of Hebei Provincial Education Department (QN2016233, ZD2016131).					Tang, K.W., Du, Q., Discussion on groundwater function zoning (2004) Water Resour. Prot, 20, pp. 16-19; Tang, K.W., Tang, Y., Li, Y.Y., Hou, J., Technical system of functional division for groundwater and its application in China. J (2012) Hydraul. Eng, 43, pp. 1349-1356; Zhang, G.H., Nie, Z.L., Shen, J.M., Wang, J.Z., Yang, M.J., Constituents and meaning of the attributive index of groundwater f…	Yang, X.; School ofWater Conservancy and Hydropower, China; email: 1180411017@stu.xaut.edu.cn			MDPI AG					20734441				English	Water	Article	Final	All Open Access, Gold
Benra F., De Frutos A., Gaglio M., Álvarez-Garretón C., Felipe-Lucia M., Bonn A.	57201518659;57225699924;56507037400;26024618900;55773643400;6602394803;	Mapping water ecosystem services: Evaluating InVEST model predictions in data scarce regions	Exclude	-	2021	Environmental Modelling and Software	138		104982				4	10.1016/j.envsoft.2021.104982	https://www.scopus.com/inward/record.uri?eid=2-s2.0-85100680839&doi=10.1016%2fj.envsoft.2021.104982&partnerID=40&md5=68f9585707e157f6f390699c1d06133f	Helmholtz Centre for Environmental Research - UFZ, Department of Ecosystem Services, Permoserstraße 15, Leipzig, 04318, Germany; Institute of Biodiversity, Friedrich-Schiller-University Jena, Faculty of Biological Sciences, Dornburger Straße 159, Jena, 07743, Germany; German Centre for Integrative Biodiversity Research (iDiv) Halle-Jena-Leipzig, Puschstrasse 4, Leipzig, D-04103, Germany; Departme…	Benra, F., Helmholtz Centre for Environmental Research - UFZ, Department of Ecosystem Services, Permoserstraße 15, Leipzig, 04318, Germany, Institute of Biodiversity, Friedrich-Schiller-University Jena, Faculty of Biological Sciences, Dornburger Straße 159, Jena, 07743, Germany, German Centre for Integrative Biodiversity Research (iDiv) Halle-Jena-Leipzig, Puschstrasse 4, Leipzig, D-04103, German…	Sustainable management of water ecosystem services requires reliable information to support decision making. We evaluate the performance of the InVEST Seasonal Water Yield Model (SWYM) against water monitoring records in 224 catchments in southern Chile. We run the SWYM in three years (1998, 2007 and 2013) to account for recent land-use change and climatic variations. We computed squared Pearson …	Blue ecosystem services; Data scarce regions; Ecosystem service model; South America; Water regulation; Water supply	Ecosystems; Forecasting; Hydrogeology; Land use; Water management; Water supply; Climatic variation; Land-use change; Model prediction; Pearson correlation; Sustainable management; Temporal variation; Water ecosystems; Water monitoring; Decision making; decision support system; ecosystem service; estimation method; least squares method; performance assessment; prediction; streamflow; sustainable …					ANID/FONDAP/15110009, ANID/NSFC190018; 62170002; Deutsche Forschungsgemeinschaft, DFG: 202548816, DFG-FZT 118	F. B was funded by the National Agency for Research and Development (ANID) through scholarship program Becas Chile-Doctorado Acuerdo Bilateral DAAD convocatoria 2017 number 62170002 . F.B., M.F.L. and A.B. gratefully acknowledge the support of iDiv funded by the German Research Foundation ( DFG-FZT 118, 202548816 ). C.A.G is supported by the Center for Climate and Resilience Research (CR2, ANID/F…						Addor, N., Do, H.X., Alvarez-Garreton, C., Coxon, G., Fowler, K., Mendoza, P.A., Large-sample hydrology: recent progress, guidelines for new datasets and grand challenges (2019) Hydrol. Sci. J., pp. 1-14. , 00; Aguayo, M., Stehr, A., Link, O., Respuesta hidrológica de una cuenca de meso escala frente a futuros escenarios de expansión forestal (2016) Rev. Geogr. Norte Gd., 65, pp. 197-214; Allen, …	Benra, F.; German Centre for Integrative Biodiversity Research (iDiv) Halle-Jena-Leipzig, Puschstraße 4, Germany; email: felipe.benra@idiv.de			Elsevier Ltd					13648152		EMSOF		English	Environ. Model. Softw.	Article	Final
Hu Y., Lu Y., Edmonds J., Liu C., Zhang Q., Zheng C.	56784499100;55506599900;23977542900;56637251100;56104536500;7401934994;	Irrigation alters source-composition characteristics of groundwater dissolved organic matter in a large arid river basin, Northwestern China	Exclude	-	2021	Science of the Total Environment	767		144372				2	10.1016/j.scitotenv.2020.144372	https://www.scopus.com/inward/record.uri?eid=2-s2.0-85098994488&doi=10.1016%2fj.scitotenv.2020.144372&partnerID=40&md5=7a96673973e8fb972901162dde96acbf	State Key Laboratory of Geohazard Prevention and Geoenvironment Protection (Chengdu University of Technology), Chengdu, 610059, China; Molecular Eco-Geochemistry Laboratory, Department of Geological Sciences, University of Alabama, Tuscaloosa, AL 35487, United States; Physical and Life Sciences, Nevada State College, Henderson, NV 89002, United States; School of Environmental Science and Engineer…	Hu, Y., State Key Laboratory of Geohazard Prevention and Geoenvironment Protection (Chengdu University of Technology), Chengdu, 610059, China; Lu, Y., Molecular Eco-Geochemistry Laboratory, Department of Geological Sciences, University of Alabama, Tuscaloosa, AL 35487, United States; Edmonds, J., Physical and Life Sciences, Nevada State College, Henderson, NV 89002, United States; Liu, C., State …	It has been well documented that agricultural activities lead to significant alterations in surface water dissolved organic matter (DOM), yet their impacts on groundwater DOM remain poorly constrained. The quantity, source, and composition of DOM play a pivotal role in a range of groundwater ecosystem services that are of important ecological and societal values. We assessed the impact of irrigat…	DOC; Excitation-emission matrix; Groundwater DOM; Heihe River Basin; Irrigation return flows; Parallel factor analysis	Agricultural robots; Aquifers; Biogeochemistry; Dissolution; Ecosystems; Fluorescence; Hydrogeology; Irrigation; Irrigation canals; Organic carbon; Rivers; Soils; Stream flow; Water pollution; Watersheds; Compositional characteristics; Dissolved inorganic carbon; Dissolved organic carbon; Dissolved organic matters; Ecological consequences; Excitation emission matrices; Parallel factor analysis; S…		carbon 13, 14762-74-4; deuterium, 7782-39-0; nitrate, 14797-55-8; oxygen 18, 14797-71-8			National Natural Science Foundation of China, NSFC: 41807407, 41901023; China Scholarship Council, CSC; Ministry of Agriculture of the People's Republic of China, MOA; South University of Science and Technology of China, SUSTC; State Key Laboratory of Geohazard Prevention and Geoenvironment Protection, SKLGP: SKLGP2019Z004; Major Science and Technology Program for Water Pollution Control and Trea…	This work was supported by the National Natural Science Foundation of China [Grant numbers: 41807407 and 41901023], the State Key Laboratory of Geohazard Prevention and Geoenvironment Protection (Independent Research Project) [Grant number: SKLGP2019Z004], and the Ministry of Ecology and Environment of the People's Republic of China (the Major Science and Technology Program for Water Pollution Co…	Y.H. acknowledges the financial support from the China Scholarship Council for working at the University of New Hampshire as a visiting scholar during the preparation of this manuscript. Y.H.L. acknowledges the six-month Sabbatical Fellowship from the South University of Science and Technology, China. J.W.E acknowledges the contribution of Nafesa Ahmed in generating fluorescence measurements at N…	This work was supported by the National Natural Science Foundation of China [Grant numbers: 41807407 and 41901023 ], the State Key Laboratory of Geohazard Prevention and Geoenvironment Protection (Independent Research Project) [Grant number: SKLGP2019Z004 ], and the Ministry of Ecology and Environment of the People's Republic of China (the Major Science and Technology Program for Water Pollution …				Aitkenhead-Peterson, J.A., McDowell, W.H., Neff, J.C., Sources, production, and regulation of allochthonous dissolved organic matter inputs to surface waters (2003) Aquatic Ecosystems: Interactivity of Dissolved Organic Matter, pp. 25-70. , S.E.G. Findlay R.L. Sinsabaugh Elsevier New York; Ali, R.K., El-Aty, A.M.A., Badawy, M.I., Abdel-Karim, A., Gad-Allah, T.A., Ali, M.E.M., Impacts of algal cel…	Lu, Y.; Molecular Eco-Geochemistry Laboratory, United States; email: yuehan.lu@ua.edu			Elsevier B.V.					489697		STEVA	33434831	English	Sci. Total Environ.	Article	Final
Lü D., Lü Y.	57209825530;36072027700;	Spatiotemporal variability of water ecosystem services can be effectively quantified by a composite indicator approach			2021	Ecological Indicators	130		108061				1	10.1016/j.ecolind.2021.108061	https://www.scopus.com/inward/record.uri?eid=2-s2.0-85111593015&doi=10.1016%2fj.ecolind.2021.108061&partnerID=40&md5=8620d1518a7b6d7082d3085c89891258	State Key Laboratory of Urban and Regional Ecology, Research Center for Eco-Environmental Sciences, Chinese Academy of Sciences, PO Box 2871, Beijing, 100085, China; University of Chinese Academy of Sciences, Beijing, 100049, China	Lü, D., State Key Laboratory of Urban and Regional Ecology, Research Center for Eco-Environmental Sciences, Chinese Academy of Sciences, PO Box 2871, Beijing, 100085, China, University of Chinese Academy of Sciences, Beijing, 100049, China; Lü, Y., State Key Laboratory of Urban and Regional Ecology, Research Center for Eco-Environmental Sciences, Chinese Academy of Sciences, PO Box 2871, Beijing,…	Ecological restoration will be promoted globally as a strategic solution supporting the relevant sustainable development goals including land degradation neutrality. However, this restorative approach is facing challenges from climate change and anthropogenic land-use change. One of these acute challenges is to balance ecological restoration and water ecosystem services particularly in dryland ar…	Dryland; Ecological restoration; Gross primary productivity (GPP); Runoff; Spatial pattern	Climate change; Ecosystems; Land use; Photosynthesis; Phytoplankton; Remote sensing; Runoff; Sustainable development; Watersheds; Chinese Loess Plateau; Composite indicators; Dryland; Ecological restoration; Ecosystem services; Gross primary productivity; Service index; Spatial patterns; Spatiotemporal variability; Water ecosystems; Restoration; climate change; ecosystem service; land degradation…					National Natural Science Foundation of China, NSFC: 42041005-5; Chinese Academy of Sciences, CAS: 121311KYSB20170004; National Key Research and Development Program of China, NKRDPC: 2016YFC0501601	The study was funded by the National Natural Science Foundation of China ( 42041005-5 ), the National Key Research and Development Program of China (No. 2016YFC0501601 ), and the International Partnership Program of Chinese Academy of Sciences (No. 121311KYSB20170004 ).						Abhilash, P.C., Restoring the unrestored: strategies for restoring global land during the UN Decade on Ecosystem Restoration (UN-DER) (2021) Land, 10, p. 201; Andrew, M.E., Wulder, M.A., Nelson, T.A., Potential contributions of remote sensing to ecosystem service assessments (2014) Prog. Phys. Geogr., 38 (3), pp. 328-353; Aronson, J., Goodwin, N., Orlando, L., Eisenberg, C., Cross, A.T., A world …	Lü, Y.; State Key Laboratory of Urban and Regional Ecology, PO Box 2871, China; email: lyh@rcees.ac.cn			Elsevier B.V.					1470160X				English	Ecol. Indic.	Article	Final	All Open Access, Gold
Bremer L.L., DeMaagd N., Wada C.A., Burnett K.M.	36612839300;57205760198;57201620783;7101850630;	Priority watershed management areas for groundwater recharge and drinking water protection: A case study from Hawai‘i Island	Exclude	-	2021	Journal of Environmental Management	286		111622				1	10.1016/j.jenvman.2020.111622	https://www.scopus.com/inward/record.uri?eid=2-s2.0-85100019736&doi=10.1016%2fj.jenvman.2020.111622&partnerID=40&md5=a38065a831f848b205399f69286c0260	University of Hawaiʻi Economic Research Organization, University of Hawaiʻi at Mānoa, 2424 Maile Way, Saunders 540, Honolulu, HI 96822, United States; Water Resources Research Center, University of Hawaiʻi at Mānoa, 2540 Dole St., Holmes Hall 283, Honolulu, HI 96822, United States; Department of Economics, University of Hawaiʻi at Mānoa, 2424 Maile Way, Saunders 542, Honolulu, HI 96822, United St…	Bremer, L.L., University of Hawaiʻi Economic Research Organization, University of Hawaiʻi at Mānoa, 2424 Maile Way, Saunders 540, Honolulu, HI 96822, United States, Water Resources Research Center, University of Hawaiʻi at Mānoa, 2540 Dole St., Holmes Hall 283, Honolulu, HI 96822, United States; DeMaagd, N., University of Hawaiʻi Economic Research Organization, University of Hawaiʻi at Mānoa, 242…	Worldwide, water utilities and other water users increasingly seek to finance watershed protection and restoration in order to maintain or enhance water quality and quantity important for drinking water supply and other human use. Hydrologic studies which characterize the relative effectiveness of watershed management activities in terms of metrics important to water users are greatly needed to g…	Ecohydrology; Forest conservation; Forest restoration; Hydrologic ecosystem services; Invasive species; Water resources	drinking water; ground water; aquifer; cloud forest; drinking water; environmental protection; groundwater; investment; prioritization; recharge; utility sector; water management; water planning; water quality; water supply; water use; watershed; air temperature; aquifer; Article; canopy; case study; cloud forest; evapotranspiration; fluid balance; fog; grassland; investment; land use; watershed;…		Drinking Water			National Science Foundation, NSF: CP-2021-07, OIA-1557349; Water Resources Research Center, University of Massachusetts Amherst, WRRC	Funding for this project came from the Hawai?i Community Foundation, the County of Hawai?i Department of Water Supply, and the National Science Foundation's Research Infrastructure Improvement Award (RII) Track-1: ?Ike Wai: Securing Hawai?i's Water Future Award # OIA-1557349. We are grateful to Keith Okamoto and Kurt Inaba of County of Hawai?i Department of Water Supply for their direction and gu…	Funding for this project came from the Hawai‘i Community Foundation , the County of Hawai‘i Department of Water Supply, and the National Science Foundation's Research Infrastructure Improvement Award (RII) Track-1: ‘Ike Wai: Securing Hawai‘i’s Water Future Award # OIA-1557349 . We are grateful to Keith Okamoto and Kurt Inaba of County of Hawai‘i Department of Water Supply for their direction and …					Blackmore, M., Vitousek, P.M., Cattle grazing, forest loss, and fuel loading in a dry forest ecosystem at Puu Wa‘aWa‘a Ranch (2000) Biotropica, 32, pp. 625-632; Brauman, K.A., Freyberg, D.L., Daily, G.C., Forest structure influences on rainfall partitioning and cloud interception: a comparison of native forest sites in Kona (2010) Hawai‘i. Agric. For. Meteorol., 150, pp. 265-275; Bremer, L.L., Au…	Bremer, L.L.; University of Hawaiʻi Economic Research Organization, 2424 Maile Way, Saunders 540, United States; email: lbremer@hawaii.edu			Academic Press					3014797		JEVMA	33526349	English	J. Environ. Manage.	Article	Final	All Open Access, Hybrid Gold
de Castro-Pardo M., Martínez P.F., Zabaleta A.P., Azevedo J.C.	57211074869;56883819200;57201864048;57215410546;	Dealing with water conflicts: A comprehensive review of mcdm approaches to manage freshwater ecosystem services	Exclude	-	2021	Land	10	5	469				1	10.3390/land10050469	https://www.scopus.com/inward/record.uri?eid=2-s2.0-85105931011&doi=10.3390%2fland10050469&partnerID=40&md5=aed98f441797c54b3ceda33ccfe04133	Department of Financial Economics and Actuarial and Statistics-Statistics and Operational Research, Campus of Somosaguas, Complutense University of Madrid, Pozuelo de Alarcón, Madrid, 28223, Spain; Department of Applied Economics I and History and Economic Institutions, UNESCO UNED-URJC Chair in Water and Peace, URJC, Faculty of Law and Social Sciences, Campus of Vicálvaro, Universidad Rey Juan C…	de Castro-Pardo, M., Department of Financial Economics and Actuarial and Statistics-Statistics and Operational Research, Campus of Somosaguas, Complutense University of Madrid, Pozuelo de Alarcón, Madrid, 28223, Spain; Martínez, P.F., Department of Applied Economics I and History and Economic Institutions, UNESCO UNED-URJC Chair in Water and Peace, URJC, Faculty of Law and Social Sciences, Campus…	This paper presents a comprehensive review of the application of Multiple-Criteria Decision-Making (MCDM) approaches exclusively to water-related freshwater ecosystem services. MCDM analysis has been useful in solving conflicts and it works well in this framework, given the serious conflicts historically associated with water use and the protection of freshwater ecosystems around the world. In th…	Conflicts; Ecosystem services; Freshwater ecosystems; Multiple-Criteria Decision-Making; Protected areas; Stakeholders; Water													Martin-Ortega, J., Ferrier, R.C., Gordon, I.J., Khan, S., (2015) Water Ecosystem Services: A Global Perspective, , UNESCO Publishing: Paris, France; Hoekstra, A.Y., Wiedmann, T.O., Humanity’s unsustainable environmental footprint (2014) Science, 344, pp. 1114-1117. , [CrossRef] [PubMed]; Ormerod, S.J., Dobson, M., Hildrew, A.G., Townsend, C., Multiple stressors in freshwater ecosystems (2010) Fre…
Valente R.A., de Mello K., Metedieri J.F., Américo C.	54685362000;57214184027;57221860526;57194898565;	A multicriteria evaluation approach to set forest restoration priorities based on water ecosystem services	Exclude	-	2021	Journal of Environmental Management	285		112049				1	10.1016/j.jenvman.2021.112049	https://www.scopus.com/inward/record.uri?eid=2-s2.0-85100509893&doi=10.1016%2fj.jenvman.2021.112049&partnerID=40&md5=4a7e2285d076c29c075daa00804ae89c	Department of Environmental Science, Federal University of São Carlos, Sorocaba Campus. Highway João Leme dos Santos (SP-264), km 110, Sorocaba, SP 18052-780, Brazil; Department of Ecology, Biosciences Institute, University of São Paulo (USP), Rua do Matão, 321, São Paulo, SP, Brazil	Valente, R.A., Department of Environmental Science, Federal University of São Carlos, Sorocaba Campus. Highway João Leme dos Santos (SP-264), km 110, Sorocaba, SP 18052-780, Brazil; de Mello, K., Department of Ecology, Biosciences Institute, University of São Paulo (USP), Rua do Matão, 321, São Paulo, SP, Brazil; Metedieri, J.F., Department of Environmental Science, Federal University of São Carl…	Forest plays an important role in keeping water ecosystem services, such as drinking water provision. Thus, payment for ecosystem services is an essential instrument to promote forest restoration in agricultural watersheds. However, funds are limited and must be well planned to ensure water resources conservation and water ecosystem services improvement. In this context, our study aimed to identi…	Atlantic forest; Forest restoration; Participatory analysis; Payment for ecosystem services; Watershed management; Weighted linear combination method	drinking water; ecosystem service; environmental restoration; forest cover; multicriteria analysis; prioritization; watershed; Atlantic Forest; water; agriculture; ecosystem; environmental protection; forest; river; Agriculture; Conservation of Natural Resources; Ecosystem; Forests; Rivers; Water		water, 7732-18-5; Water			Fundação de Amparo à Pesquisa do Estado de São Paulo, FAPESP: 2013/03586–6, 2018/21612–8	This work was supported by the São Paulo Research Foundation ( FAPESP – Processes number: 2013/03586–6 and 2018/21612–8 ).						Agnew, L.J., Lyon, S., Gérard-Marchant, P., Collins, V.B., Lembo, A.J., Steenhuis, S., Walter, M.T., Identifying hydrologically sensitive areas: bridging the gap between science and application (2006) J. Environ. Manag., 78 (1), pp. 63-76; Living forests report.Washington D.C. World wildlife fund (WWF) (2011), https://wwfeu.awsassets.panda.org/downloads/living_forests_chapter_1_26_4_11.pdf; Banks…	Américo, C.; Department of Environmental Science, Brazil; email: carla.americo@gmail.com			Academic Press					3014797		JEVMA	33578210	English	J. Environ. Manage.	Article	Final
Wang J., Koopman K.R., Collas F.P.L., Posthuma L., de Nijs T., Leuven R.S.E.W., Hendriks A.J.	57215425158;55735916600;55737233600;6603615990;8958817500;6701560834;57027335900;	Towards an ecosystem service-based method to quantify the filtration services of mussels under chemical exposure	Exclude	-	2021	Science of the Total Environment	763		144196				1	10.1016/j.scitotenv.2020.144196	https://www.scopus.com/inward/record.uri?eid=2-s2.0-85098713447&doi=10.1016%2fj.scitotenv.2020.144196&partnerID=40&md5=53ceeafbbf08b9f971b4cdd7aa857372	Centre for Sustainability, Environment and Health, National Institute for Public Health and the Environment (RIVM), P.O. Box 1, Bilthoven, 3720 BA, Netherlands; Department of Environmental Science, Institute for Water and Wetland Research, Radboud University, P.O. Box 9010, Nijmegen, 6500 GL, Netherlands; Department of Animal Ecology and Physiology, Institute for Water and Wetland Research, Radbo…	Wang, J., Centre for Sustainability, Environment and Health, National Institute for Public Health and the Environment (RIVM), P.O. Box 1, Bilthoven, 3720 BA, Netherlands, Department of Environmental Science, Institute for Water and Wetland Research, Radboud University, P.O. Box 9010, Nijmegen, 6500 GL, Netherlands; Koopman, K.R., Centre for Sustainability, Environment and Health, National Institu…	As filter-feeders, freshwater mussels provide the ecosystem service (ES) of biofiltration. Chemical pollution may impinge on the provisioning of mussels' filtration services. However, few attempts have been made to estimate the impacts of chemical mixtures on mussels' filtration capacities in the field, nor to assess the economic benefits of mussel-provided filtration services for humans. The aim…	Dreissena polymorpha; Dreissena rostriformis bugensis; Drinking water treatment; Ecosystem services; Filtration capacity; Metal	Economic analysis; Economic and social effects; Ecosystems; Emission control; Metals; Mixtures; Molluscs; Potable water; Rivers; Water filtration; Chemical pollution; Development and applications; Drinking water production; Ecosystem services; Environmental stressors; Filtration capacity; Freshwater mussels; Metal concentrations; River pollution; cadmium; copper; drinking water; lead; zinc; biofi…		cadmium, 22537-48-0, 7440-43-9; copper, 15158-11-9, 7440-50-8; lead, 7439-92-1, 13966-28-4; zinc, 7440-66-6, 14378-32-6; Water Pollutants, Chemical										Abdul-Rahim, A., Mohd-Shahwahid, H., A panel data analysis of timber harvesting operations and its impact on the cost of water treatment (2011) Aust. J. Basic Appl. Sci., 5, pp. 598-601; Apitz, S.E., Ecosystem services and environmental decision making: seeking order in complexity (2013) Integr. Environ. Assess. Manag., 9, pp. 214-230; Benedict, I., Heerwaarden, C.C.V., Weerts, A.H., Hazeleger, W…	Wang, J.; Centre for Sustainability, P.O. Box 1, Netherlands; email: jiaqi.wang.1@ru.nl			Elsevier B.V.					489697		STEVA	33383510	English	Sci. Total Environ.	Article	Final	All Open Access, Hybrid Gold
Khorrami M., Malekmohammadi B.	57191225348;27467529300;	Effects of excessive water extraction on groundwater ecosystem services: Vulnerability assessments using biophysical approaches	Exclude	-	2021	Science of the Total Environment	799		149304					10.1016/j.scitotenv.2021.149304	https://www.scopus.com/inward/record.uri?eid=2-s2.0-85112003802&doi=10.1016%2fj.scitotenv.2021.149304&partnerID=40&md5=a2d72095cb17538da3bbd647e1346b22	School of Environment, College of Engineering, University of Tehran, Tehran, Iran	Khorrami, M., School of Environment, College of Engineering, University of Tehran, Tehran, Iran; Malekmohammadi, B., School of Environment, College of Engineering, University of Tehran, Tehran, Iran	In this research, a systematic, integrated framework was developed to evaluate the biophysical state and vulnerability intensity of groundwater supply ecosystem service (GSES) regarding excessive groundwater withdrawal in the Mashhad plain located in the northeastern of Khorasan Razavi province in Iran. At first, following an indexing approach, the biophysical aspects of the ecosystem, including …	Ecosystem service; Groundwater supply; Indexing approach; Mashhad plain-Iran; Turner model; Vulnerability assessment	3D modeling; Aquifers; Biophysics; Ecosystems; Extraction; Groundwater resources; Hydrogeology; Indexing (of information); Sustainable development; Biophysical state; Ecosystem services; Groundwater supply; Indexing approaches; Integrated frameworks; Mashhad; Mashhad plain-iran; Turner model; Vulnerability assessments; Water extraction; Landforms; aquifer; ecosystem service; extraction; groundwat…						The authors would like to express their gratitude to the technical experts of Regional Water Company and the Department of Environment of Khorasan Razavi Province to provide the data and technical assistance. The authors would like to thank Prof. Ashantha Goonetilleke Associate Editor of journal and three reviewers for their constructive comments on the correction and improvement of the manuscrip…						Abbasi, F., Sohrab, F., Abbasi, N., Report of Irrigation Efficiencies and its Temporal and Spatial Changes in Iran (2015), Agricultural Engineering Research Institute; Ahmadi, K., Ebadzadeh, H., Abdshah, H., Kazemian, A., Rafiei, M., Agricultural Statistics of Iran (Crop Year 2017-2018) Volume I: Crops (2018), Agricultural Engineering Research Institute; Anandhi, A., Kannan, N., Vulnerability ass…	Malekmohammadi, B.; School of Environment, Iran; email: malekb@ut.ac.ir			Elsevier B.V.					489697		STEVA	34375873	English	Sci. Total Environ.	Article	Final
Pacetti T., Castelli G., Schröder B., Bresci E., Caporali E.	56611999500;57194380100;7102044891;6508163320;57022108100;	Water Ecosystem Services Footprint of agricultural production in Central Italy	Exclude	-	2021	Science of the Total Environment	797		149095					10.1016/j.scitotenv.2021.149095	https://www.scopus.com/inward/record.uri?eid=2-s2.0-85111065509&doi=10.1016%2fj.scitotenv.2021.149095&partnerID=40&md5=b338a187c355bb42a30d51194545e812	Department of Civil and Environmental Engineering (DICEA), Università degli Studi di Firenze, Italy; Department of Agriculture, Food, Environment and Forestry (DAGRI), Università degli Studi di Firenze, Italy; Landscape Ecology and Environmental Systems Analysis, Institute of Geoecology, Technische Universität Braunschweig, Langer Kamp 19c, Braunschweig, 38106, Germany; Berlin-Brandenburg Institu…	Pacetti, T., Department of Civil and Environmental Engineering (DICEA), Università degli Studi di Firenze, Italy; Castelli, G., Department of Agriculture, Food, Environment and Forestry (DAGRI), Università degli Studi di Firenze, Italy; Schröder, B., Landscape Ecology and Environmental Systems Analysis, Institute of Geoecology, Technische Universität Braunschweig, Langer Kamp 19c, Braunschweig, 3…	The appropriate implementation of the concept of Water-related Ecosystem Services (WES) in water resources planning can support the development of productive activities and, at the same time, sustain local ecosystems. However, such implementation it is only possible when both WES supply and demand are evaluated, eventually with a spatially explicit method, for gaining insights into the ecohydrolo…	Arno river; Ecosystem services; Integrated water resources management; SWAT; Water Footprint	Agriculture; Catchments; Economics; Ecosystems; Runoff; Water management; Agricultural sector; Arno river; Central Italy; Ecosystem services; Integrated Water Resources Management; Service demand; Service supply; Soil water assessment tool; Water ecosystems; Water footprint; Soil moisture; agricultural production; ecosystem service; hydrological modeling; river basin; soil and water assessment to…					International Institute for Applied Systems Analysis, IIASA	The authors wish to thank Dr. Barbara Willaarts from the International Institute for Applied Systems Analysis (IIASA) for her valuable support in the preliminary stage of this research and Dr. David Rivas from the Research Centre for the Management of Agricultural and Environmental Risks (CEIGRAM) for his suggestions in implementing the SWAT model.						Abbaspour, K.C., User Manual for SWAT-CUP, SWAT Calibration and Uncertainty Analysis Programs (2007), wSwiss Federal Institute of Aquatic Science and Technology Eawag, Dübendorf, Switzerland; Alessi, E., Bologna, G., Water resources in the anthropocene age: a planetary urgency (2015) The Water We Eat: Combining Virtual Water and Water Footprints, , M. Antonelli F. Greco Springer International Pub…	Pacetti, T.; Department of Civil and Environmental Engineering (DICEA), Italy; email: tommaso.pacetti@unifi.it			Elsevier B.V.					489697		STEVA	34346365	English	Sci. Total Environ.	Article	Final
Zhang L., Yin W., Wang C., Zhang A., Zhang H., Zhang T., Ju F.	57219713397;57238971500;57235979300;57225039174;57239145500;24470677400;55555732300;	Untangling Microbiota Diversity and Assembly Patterns in the World's Largest Water Diversion Canal	Exclude	-	2021	Water Research	204		117617					10.1016/j.watres.2021.117617	https://www.scopus.com/inward/record.uri?eid=2-s2.0-85115123304&doi=10.1016%2fj.watres.2021.117617&partnerID=40&md5=37fd81558de93c95fbab9f0bbcf188ee	Key Laboratory of Coastal Environment and Resources of Zhejiang Province, School of Engineering, Westlake University, 18 Shilongshan Road, Hangzhou, Zhejiang Province 310024, China; Institute of Advanced Technology, Westlake Institute for Advanced Study, 18 Shilongshan Road, Hangzhou, Zhejiang Province 310024, China; Changjiang Water Resources Protection Institute, 515 Qintai Street, Wuhan, Hubei…	Zhang, L., Key Laboratory of Coastal Environment and Resources of Zhejiang Province, School of Engineering, Westlake University, 18 Shilongshan Road, Hangzhou, Zhejiang Province 310024, China, Institute of Advanced Technology, Westlake Institute for Advanced Study, 18 Shilongshan Road, Hangzhou, Zhejiang Province 310024, China; Yin, W., Changjiang Water Resources Protection Institute, 515 Qintai …	Large water diversion projects are important constructions for reallocation of human-essential water resources. Deciphering microbiota dynamics and assembly mechanisms underlying canal water ecosystem services especially during long-distance diversion is a prerequisite for water quality monitoring, biohazard warning and sustainable management. Using a 1432-km canal of the South-to-North Water Div…	Bacterial community; Deterministic assembly; Engineered system; Micro-eukaryote; Population growth; Stochastic assembly	Dynamics; Ecosystems; Flood control; Population statistics; Stochastic systems; Sustainable development; Water conservation; Water quality; Water resources; Assembly patterns; Bacterial community; Deterministic assembly; Deterministics; Engineered systems; Eukaryotics; Micro-eukaryotes; Microbiotas; Population growth; Stochastic assembly; Bacteria; Bacteria (microorganisms); Cryptophyta; Eukaryot…					National Natural Science Foundation of China, NSFC: 51908467, U2040210; Natural Science Foundation of Zhejiang Province, ZJNSF: LQ20C030002	We would like to thank Yuanzhen He, Guoqing Zhang, Zhipeng Zhang, Shengguang Yuan, Aoxiang Fan and Qinglin Jia for the assistance in water sampling. This work was supported by National Natural Science Foundation of China ( Grant No. 51908467 and No. U2040210 ), and Zhejiang Provincial Natural Science Foundation of China ( Grant No. LQ20C030002 ).						Al Atrouni, A., Joly-Guillou, M.-L., Hamze, M., Kempf, M., Reservoirs of non-baumannii Acinetobacter species (2016) Front. Microbiol., 7, p. 49; Arrigo, K.R., Marine microorganisms and global nutrient cycles (2005) Nature, 437 (7057), pp. 349-355; Barlow, J.T., Bogatyrev, S.R., Ismagilov, R.F., A quantitative sequencing framework for absolute abundance measurements of mucosal and lumenal microbia…	Ju, F.; Environmental Microbiome Engineering and Biotechnology Laboratory (EMBLab), China; email: jufeng@westlake.edu.cn			Elsevier Ltd					431354		WATRA		English	Water Res.	Article	Final	All Open Access, Green
Shi D., Shi Y., Wu Q.	57203785137;7404963749;57001818900;	Multidimensional assessment of lake water ecosystem services using remote sensing	Include	no	2021	Remote Sensing	13	17	3540					10.3390/rs13173540	https://www.scopus.com/inward/record.uri?eid=2-s2.0-85114556131&doi=10.3390%2frs13173540&partnerID=40&md5=1106d2c37d8e43501df2cb3c8fabec2e	College of Surveying and Geo-Informatics, Tongji University, Shanghai, 200092, China; Department of Geography, University of Tennessee, Knoxville, TN 37996, United States; Technology Innovation Center for Land Spatial Eco-Restoration in the Metropolitan Area, MNR, Shanghai, 200003, China	Shi, D., College of Surveying and Geo-Informatics, Tongji University, Shanghai, 200092, China, Department of Geography, University of Tennessee, Knoxville, TN 37996, United States, Technology Innovation Center for Land Spatial Eco-Restoration in the Metropolitan Area, MNR, Shanghai, 200003, China; Shi, Y., College of Surveying and Geo-Informatics, Tongji University, Shanghai, 200092, China, Techn…	Freshwater is becoming scarce worldwide with the rapidly growing population, developing industries, burgeoning agriculture, and increasing consumption. Assessment of ecosystem services has been regarded as a promising way to reconcile the increasing demand and depleting natural resources. In this paper, we proposed a multidimensional assessment framework for evaluating water provisioning ecosyste…	Google earth engine; Lake water storage; Multidimensional assessment; Remote sensing; Surface water; Water provisioning ecosystem services	Agricultural robots; Climate change; Efficiency; Hydrogeology; Lakes; Remote sensing; Ecosystem services; Human activities; Level efficiencies; Multi-Sources; Multidimensional framework; Policy makers; Spatial clustering; Stable distributions; Ecosystems					University of Tennessee, UT; Ministry of Natural Resources of the People's Republic of China, MNR: 200003, CXZX202004; China Scholarship Council, CSC	Funding: This research was supported by the Technology Innovation Center for Land Spatial Eco-restoration in the Metropolitan Area, MNR, Shanghai, 200003 (Project number: CXZX202004). We would also like to thank the China Scholarship Council for sponsoring D.S. to study at the University of Tennessee as a visiting scholar.						Carpenter, S.R., DeFries, R., Dietz, T., Mooney, H.A., Polasky, S., Reid, W.V., Scholes, R.J., Ecology. Millennium Ecosystem As-sessment: Research Needs (2006) Science, 314, pp. 257-258; Shi, Y., Shi, D., Zhou, L., Fang, R., Identification of Ecosystem Services Supply and Demand Areas and Simulation of Ecosystem Service Flows in Shanghai (2020) Ecol. Indic, 115, p. 106418; Maltby, E., (2009) Func…	Wu, Q.; Department of Geography, United States; email: qwu18@utk.edu			MDPI					20724292				English	Remote Sens.	Article	Final	All Open Access, Gold
Lu Y., Liu M., Zeng S., Wang C.	57212552577;57223892086;55751063300;7501637590;	Screening and mitigating major threats of regional development to water ecosystems using ecosystem services as endpoints	Include	no	2021	Journal of Environmental Management	293		112787					10.1016/j.jenvman.2021.112787	https://www.scopus.com/inward/record.uri?eid=2-s2.0-85106371898&doi=10.1016%2fj.jenvman.2021.112787&partnerID=40&md5=30d147c89b9241225ddd13740b37d3c0	School of Environment, Tsinghua University, Beijing, 100084, China	Lu, Y., School of Environment, Tsinghua University, Beijing, 100084, China; Liu, M., School of Environment, Tsinghua University, Beijing, 100084, China; Zeng, S., School of Environment, Tsinghua University, Beijing, 100084, China; Wang, C., School of Environment, Tsinghua University, Beijing, 100084, China	Coordinating the coercion of human activities to the ecosystem is a continuous strategic concern. A practical way to conceptualize socioeconomic development and link it to ecosystem response is urgently needed. This study proposed a two-staged method to reveal the threats concealed in socioeconomic development and show the return of water ecosystem services to regulation measures. Eight threat in…	Beijing-Tianjin-Hebei District; Environmental impact; Integrated management; Regional development; Threat screening; Water ecosystem services	water; decision making; detection method; ecosystem response; ecosystem service; human activity; regional development; socioeconomic conditions; sustainability; agriculture; Article; China; economic development; ecosystem health; environmental impact; environmental management; environmental monitoring; government; habitat; human activities; industrial production; pollution; public sector; water i…		water, 7732-18-5; Water			Ministry of Ecology and Environment, The People’s Republic of China, MEE: 2110203	This work was supported by the Special Project of Central Finance of Ministry of Ecology and Environment of China “Strategies environmental assessment of major regional and industrial development” (Grant No. 2110203 ).						Battista, W., Karr, K., Sarto, N., Fujita, R., Comprehensive Assessment of Risk to Ecosystems ( CARE): a cumulative ecosystem risk assessment tool (2017) Fish. Res., 185, pp. 115-129; Borgwardt, F., Robinson, L., Trauner, D., Teixeira, H., Nogueira, A.J.A., Lillebø, A.I., Piet, G., Culhane, F., Exploring variability in environmental impact risk from human activities across aquatic ecosystems (201…	Zeng, S.; School of Environment, China; email: szeng@tsinghua.edu.cn			Academic Press					3014797		JEVMA	34029981	English	J. Environ. Manage.	Article	Final
Lara A., Jones J., Little C., Vergara N.	7006634082;57213224413;23493009900;57209199206;	Streamflow response to native forest restoration in former Eucalyptus plantations in south central Chile	Exclude	-	2021	Hydrological Processes	35	8	e14270					10.1002/hyp.14270	https://www.scopus.com/inward/record.uri?eid=2-s2.0-85113573281&doi=10.1002%2fhyp.14270&partnerID=40&md5=d15e241ded19ae8b4237dc425a810fd5	Instituto de Conservación, Biodiversidad y Territorio, Facultad de Ciencias Forestales y Recursos Naturales, Universidad Austral de Chile, Valdivia, Chile; Center for Climate and Resilience Research (CR)2, Santiago, Chile; Fundación Centro de los Bosques Nativos FORECOS, Valdivia, Chile; Geography, College of Earth, Ocean, and Atmospheric Sciences, Oregon State University, Corvallis, OR, United S…	Lara, A., Instituto de Conservación, Biodiversidad y Territorio, Facultad de Ciencias Forestales y Recursos Naturales, Universidad Austral de Chile, Valdivia, Chile, Center for Climate and Resilience Research (CR)2, Santiago, Chile, Fundación Centro de los Bosques Nativos FORECOS, Valdivia, Chile; Jones, J., Geography, College of Earth, Ocean, and Atmospheric Sciences, Oregon State University, Co…	Global increases in intensive forestry have raised concerns about forest plantation effects on water, but few studies have tested the effects of plantation forest removal and native forest restoration on catchment hydrology. We describe results of a 14-year paired watershed experiment on ecological restoration in south central Chile which documents streamflow response to the early stages of nativ…	base flow; climate change; ecological restoration; ecosystem services; paired-catchment experiment; Valdivian rainforest	Aerodynamics; Climate change; Decision making; Ecosystems; Hydrogeology; Reforestation; Reservoirs (water); Restoration; Runoff; Soil moisture; Stream flow; Ecological restoration; Eucalyptus globulus; Eucalyptus plantations; Fast growing forests; Mean annual precipitation; Natural regeneration; Summer precipitation; Temperate rainforest; Conservation; baseflow; catchment; climate change; ecosyst…					2010/023; NSF 1440409; Comisión Nacional de Investigación Científica y Tecnológica, CONICYT: ANID‐PAI‐MEC 80170046; Fondo Nacional de Desarrollo Científico, Tecnológico y de Innovación Tecnológica, FONDECYT: 1085024 y 1090479; Inter-American Institute for Global Change Research, IAI: GEO‐0452325	This research has been supported by the following grants: ANID/FONDAP/15110009 (2013‐present), Iniciativa Científica Milenio (ICM, Ministerio de Planificación N° P04‐065‐F), Fondecyt N°1085024 y 1090479, CONAF (FIBN N° 2010/023), and IAI (CRN II # 2047b) supported by NSF (Grant GEO‐0452325). J.J. was supported by funding from the National Science Foundation Long‐term Ecological Research (LTER) pr…	This research has been supported by the following grants: ANID/FONDAP/15110009 (2013-present), Iniciativa Cient?fica Milenio (ICM, Ministerio de Planificaci?n N? P04-065-F), Fondecyt N?1085024 y 1090479, CONAF (FIBN N? 2010/023), and IAI (CRN II # 2047b) supported by NSF (Grant GEO-0452325). J.J. was supported by funding from the National Science Foundation Long-term Ecological Research (LTER) pr…					Aguayo, M., Pauchard, A., Azócar, G., Parra, O., Cambio del uso del suelo en el centro sur de Chile a fines del siglo XX. Entendiendo la dinámica espacial y temporal del paisaje (2009) Revista Chilena de Historia Natural, 82 (3), pp. 361-374. , https://doi.org/10.4067/s0716-078x2009000300004; Altamirano, A., Echeverría, C., Lara, A., Efecto de la fragmentación forestal sobre la estructura vegetac…	Lara, A.; Instituto de Conservación, Chile; email: antoniolara@uach.cl			John Wiley and Sons Ltd					8856087		HYPRE		English	Hydrol. Processes	Article	Final	All Open Access, Green
Garau E., Pueyo-Ros J., Palom A.R., Vila-Subiros J.	57219532613;56200924700;57219534851;56530791600;	Follow the flow: Analysis of relationships between water ecosystem service supply units and beneficiaries	Include	no	2021	Applied Geography	133		102491					10.1016/j.apgeog.2021.102491	https://www.scopus.com/inward/record.uri?eid=2-s2.0-85107761661&doi=10.1016%2fj.apgeog.2021.102491&partnerID=40&md5=ba1474460353e6c3117aae9cd96a9035	Department of Geography, Institute of Environment, IMA-UdG, University of Girona, Girona, 17071, Spain; ICRA, Catalan Institute for Water Research, Girona, 17003, Spain	Garau, E., Department of Geography, Institute of Environment, IMA-UdG, University of Girona, Girona, 17071, Spain; Pueyo-Ros, J., Department of Geography, Institute of Environment, IMA-UdG, University of Girona, Girona, 17071, Spain, ICRA, Catalan Institute for Water Research, Girona, 17003, Spain; Palom, A.R., Department of Geography, Institute of Environment, IMA-UdG, University of Girona, Giro…	A greater understanding of the complex relationships between ecosystem service (ES) supply and demand is needed to ensure a continuous and sustainable flow of ES in socioecological systems. While considerable progress has been made in ES flow mapping, further research is required to integrate beneficiaries' perspectives into these analyses. In this study, we obtained data from stakeholders to ana…	Ecosystem service mapping; Socioecological systems; Spatial relationships; Stakeholders values; Supply-demand flow; Watershed management	ecosystem service; mapping; spatial analysis; spatial distribution; stakeholder; water management; water supply; watershed; Catalonia; Spain					Ministerio de Economía y Competitividad, MINECO: CSO2016-75740-P	This work was supported by the Spanish Ministry of Economy and Competitiveness through the project “Incentives and barriers to water conservation in the tourism sector. Analysis and proposals for efficient water management” [CSO2016-75740-P].	This work was supported by the Spanish Ministry of Economy and Competitiveness through the project ?Incentives and barriers to water conservation in the tourism sector. Analysis and proposals for efficient water management? [CSO2016-75740-P].					Bagstad, K.J., Johnson, G.W., Voigt, B., Villa, F., Spatial dynamics of ecosystem service flows: A comprehensive approach to quantifying actual services (2013) Ecosystem Services, 4, pp. 117-125; Bennett, E.M., Peterson, G.D., Gordon, L.J., Understanding relationships among multiple ecosystem services (2009) Ecology Letters, 12 (12), pp. 1394-1404; Blume, L.E., Easley, D., Rationality (2007) The …	Garau, E.Pl. Ferrater Mora, 1, Spain; email: enrica.garau@udg.edu			Elsevier Ltd					1436228				English	Appl. Geogr.	Article	Final
Bremer L.L., Elshall A.S., Wada C.A., Brewington L., Delevaux J.M.S., El-Kadi A.I., Voss C.I., Burnett K.M.	36612839300;43260985900;57201620783;48361225400;56502178700;7005623180;56808140700;7101850630;	Effects of land-cover and watershed protection futures on sustainable groundwater management in a heavily utilized aquifer in Hawai‘i (USA) [美国夏威夷过度开发含水层中土地覆盖和流域保护对未来可持续地下水管理的影响] [Effets du devenir de l’occupation des sols et de la protection des bassins versants sur la gestion durable des eaux souterraines d’un aquifère fortement utilisé d’Hawaï (EUA)] [Efeitos futuros do uso da terra e da prote…	Exclude	-	2021	Hydrogeology Journal	29	5		1749	1765			10.1007/s10040-021-02310-6	https://www.scopus.com/inward/record.uri?eid=2-s2.0-85104958298&doi=10.1007%2fs10040-021-02310-6&partnerID=40&md5=5edf7bfd0d0bfedc36630e538a25a9b9	University of Hawai‘i Economic Research Organization, Honolulu, HI, United States; Water Resources Research Center, University of Hawai‘i, Honolulu, HI, United States; Department of Earth, Ocean, and Atmospheric Science, Florida State University, Tallahassee, FL, United States; East-West Center, Honolulu, HI, United States; The Natural Capital Project, Stanford University, Stanford, CA, United St…	Bremer, L.L., University of Hawai‘i Economic Research Organization, Honolulu, HI, United States, Water Resources Research Center, University of Hawai‘i, Honolulu, HI, United States; Elshall, A.S., Water Resources Research Center, University of Hawai‘i, Honolulu, HI, United States, Department of Earth, Ocean, and Atmospheric Science, Florida State University, Tallahassee, FL, United States; Wada, …	Groundwater sustainability initiatives, including sustainable yield and watershed policy protection policies, are growing globally in response to increasing demand for groundwater, coupled with concerns about the effects of climate and land-cover change on groundwater supply. Improved understanding of the impacts of watershed management on groundwater yields and management costs—particularly in t…	Groundwater management; Hydrologic ecosystem services; Invasive species; Sustainable yield; Water supply; Watershed management	aquifer; ecosystem service; future prospect; groundwater; invasive species; land cover; optimization; sustainable development; valuation; water management; water supply; watershed; Hawaii [United States]; United States					OIA 1557349; CP-2021-14; National Science Foundation, NSF: 1920304	This research was funded in part by the National Science Foundation EPSCoR Grant No. OIA 1557349.	We thank Katie Ersbak (Department of Forestry and Wildlife)?and?Will Weaver (Ko?olau Watershed Partnership) for input on the forest conservation scenarios, and?Leo Asunci?n (Hawai?i State Office of Planning) and the City and County of Honolulu for input into the development scenarios. We also gratefully acknowledge guidance from Gregory Chun from the University of Hawai?i, and Roy Hardy and Lenor…					Abell, R., Asquith, N., Boccaletti, G., Bremer, L., Chapin, E., Erikson-Quiroz, A., Higgins, J., Wood, S., (2017) Beyond the source: the environmental, economic and community benefits of source water protection, , The Nature Conservancy, Arlington, VA; Bierkens, M.F.P., Wada, Y., Non-renewable groundwater use and groundwater depletion: a review (2019) Environ Res Lett, 14, p. 063002; Brauman, K.A…	Bremer, L.L.; Water Resources Research Center, United States; email: lbremer@hawaii.edu			Springer Science and Business Media Deutschland GmbH					14312174				English	Hydrogeol. J.	Article	Final	All Open Access, Hybrid Gold
Caro-Borrero A., Carmona-Jiménez J., Rivera-Ramírez K., Bieber K.	55511408100;12806331900;57222531311;57222521679;	The effects of urbanization on aquatic ecosystems in peri-urban protected areas of Mexico City: The contradictory discourse of conservation amid expansion of informal settlements	Exclude	-	2021	Land Use Policy	102		105226					10.1016/j.landusepol.2020.105226	https://www.scopus.com/inward/record.uri?eid=2-s2.0-85103043103&doi=10.1016%2fj.landusepol.2020.105226&partnerID=40&md5=38bc12fe2c5616934cfa810690c09bc6	Departamento de Ecología y Recursos Naturales, Laboratorio de Ecosistemas de Ribera, Facultad de Ciencias, Universidad Nacional Autónoma de México (UNAM), Circuito exterior s/n, Ciudad Universitaria, Coyoacán, Ciudad de México, CP 04510, Mexico; Posgrado en Ciencias de la Sostenibilidad, UNAM, Ciudad de México, Mexico; Northern Arizona University, Flagstaff, AZ, United States	Caro-Borrero, A., Departamento de Ecología y Recursos Naturales, Laboratorio de Ecosistemas de Ribera, Facultad de Ciencias, Universidad Nacional Autónoma de México (UNAM), Circuito exterior s/n, Ciudad Universitaria, Coyoacán, Ciudad de México, CP 04510, Mexico; Carmona-Jiménez, J., Departamento de Ecología y Recursos Naturales, Laboratorio de Ecosistemas de Ribera, Facultad de Ciencias, Univers…	Years of population growth and urban expansion have affected ecologically forested areas outlying Mexico City. To control the growth and the negative impact on natural areas, the Conservation Land act of 1987s declared protection of non-populated forest areas. However, this initiative has been overshadowed by the growing demand of affordable housing. The expansion of housing in protected areas ha…	Central Mexico; Conservation duality; Megacities; Peri-urban streams; Social-environmental discourse; Socio-ecosystems; Urbanization; Water ecosystem services	aquatic ecosystem; conservation management; ecosystem service; informal settlement; local participation; megacity; periurban area; protected area; urbanization; Colombia; Magdalena River [Colombia]; Mexico [Mexico (NTN)]; Mexico [North America]						The authors want to thank the financial support program: Programa de Apoyo a Proyectos de Investigaci?n e Innovaci?n Tecnol?gica (PAPIIT-UNAM-IN307219). To Mariza Masari Hiriart for providing the facilities to carry out the bacteriological analysis, and Edgar Caro Borrero for drawing up the Figs.						Affek, A.N., Kowalska, A., Ecosystem potentials to provide services in the view of direct users (2017) Ecosyst. Serv., 26, pp. 183-196; Aguilar, A.G., Peri-urbanization, illegal settlements and environmental impact in Mexico City (2008) Cities, 25 (3), pp. 133-145; Aguilar, A.G., Santos, C., El manejo de asentamientos humanos irregulares en el suelo de conservación del Distrito Federal. Una polít…	Carmona-Jiménez, J.; Departamento de Ecología y Recursos Naturales, Circuito exterior s/n, Ciudad Universitaria, Coyoacán, Mexico; email: jcj@ciencias.unam.mx			Elsevier Ltd					2648377				English	Land Use Policy	Article	Final
Zhao Q., Wang Q.	15727016400;57222416708;	Water ecosystem service quality evaluation and value assessment of taihu lake in China	Include	no	2021	Water (Switzerland)	13	5	618					10.3390/w13050618	https://www.scopus.com/inward/record.uri?eid=2-s2.0-85102659704&doi=10.3390%2fw13050618&partnerID=40&md5=177c732d11e7e5b6ab00eabdab3501be	College of Economics and Management, Nanjing Forestry University, Nanjing, 210037, China	Zhao, Q., College of Economics and Management, Nanjing Forestry University, Nanjing, 210037, China; Wang, Q., College of Economics and Management, Nanjing Forestry University, Nanjing, 210037, China	Taihu Lake is the third largest freshwater lake in China. Water ecosystems play an important role in the survival and development of human society. The evaluation of water ecosystem services is helpful to understand and grasp the changing rules of Taihu Lake’s ecosystem services value in recent years. First, we used the Water Environment Qualities Index (WQI) to evaluate the water ecological qual…	Freshwater ecosystem; Quality evaluation; Value assessment; Water ecosystem service	Ecosystems; Function evaluation; Hydrogeology; Lakes; Water pollution; Water supply; Ecological methods; Ecosystem services value; Evaluation indicators; Fresh water lakes; Regulation services; Service functions; Water ecological qualities; Water environments; Quality control; ecosystem service; environmental assessment; environmental quality; environmental values; service quality; survey method;…					National Natural Science Foundation of China, NSFC: 71373125; Major Project of Philosophy and Social Science Research in Colleges and Universities of Jiangsu Province: 2020SJZDA073	Funding: This research was funded by the National Natural Science Foundation of China, grant number 71373125, and by the Major Project of Philosophy and Social Science Research in Jiangsu Universities, grant number 2020SJZDA073.						Costanza, R., d’Arge, R., De Groot, R., Farber, S., Grasso, M., Hannon, B., Limburg, K., Paruelo, J., The value of the world’s ecosystem services and natural capital (1997) Nature, 387, pp. 253-260; Turner, B.L., Kasperson, R.E., Matson, P.A., McCarthy, J.J., Corell, R.W., Christensen, L., Eckley, N., Martello, M.L., A Framework for Vulnerability Analysis in Sustainability Science (2003) Proc. Na…	Zhao, Q.; College of Economics and Management, China; email: zhao5190@126.com			MDPI AG					20734441				English	Water	Article	Final	All Open Access, Gold
Utepov A., Jumabayev S., Skakova A., Salmanova R., Kuandykov N.	57267487500;57193203403;56401147400;57267704000;57267917600;	The economic evaluation of water ecosystem services in urban planning in Nur Sultan, Kazakhstan [Ekonominis vandens ekosistemos paslaugų vertinimas miestų planavimui nur sultane, kazachstane]	Exclude	-	2021	Public Policy and Administration	20	2		205	219			10.13165/VPA-21-20-2-05	https://www.scopus.com/inward/record.uri?eid=2-s2.0-85115435126&doi=10.13165%2fVPA-21-20-2-05&partnerID=40&md5=e1c71bf3257251e073cde5fccf8c4936	Institute of Management, Academy of Public Administration under the President of the Republic of Kazakhstan, 33a Abay Avenue, Nur-Sultan, 010000, Kazakhstan; Al-Farabi Kazakh National University, Al-Farabi Avenue 70, Almaty, Kazakhstan	Utepov, A., Institute of Management, Academy of Public Administration under the President of the Republic of Kazakhstan, 33a Abay Avenue, Nur-Sultan, 010000, Kazakhstan; Jumabayev, S., Institute of Management, Academy of Public Administration under the President of the Republic of Kazakhstan, 33a Abay Avenue, Nur-Sultan, 010000, Kazakhstan; Skakova, A., Al-Farabi Kazakh National University, Al-Fa…	With the positive and negative consequences of rapid global urbanization, the main task of the state is to ensure the long-term quality of life of its citizens. Currently, reforms undertaken by post-Soviet states aimed at environment-related projects are facing increasing resistance and protest from local populations. In 2020, the authors of this paper carried out a study on the Maly Taldykol lak…	Ecosystem approach; ESVD; Public management; Urban planning													Abdiev, Z.A., Kolomin, Y.M., Fefelov, V.V., Khusainov, K. S., (2013) Water Bodies of Akmola Region and Their Biological Resources: Reference Manual, , Kokshetau: Northern branch of LLP KazNIIRKH; (2001) About the Master Plan of the City of Astana, , https://genplan.saulet.astana.kz/, Decre 1064 dated August 16; of Nur-Sultan, Akimat, (2001) Master plan of the city of Astana, , https://astana.gov.…				Mykolo Romerio Universitetas					16482603				English	Public Policy Adm.	Article	Final	All Open Access, Gold
de Lima A.P.M., Prado R.B., Latawiec A.E.	57226665192;56715169200;23667962400;	Payment for water-ecosystem services monitoring in brazil [Monitoramento de pagamentos por serviços ambientais hídricos no brasil]	Include	no	2021	Revista Ambiente e Agua	16	4	e2684					10.4136/ambi-agua.2684	https://www.scopus.com/inward/record.uri?eid=2-s2.0-85112331209&doi=10.4136%2fambi-agua.2684&partnerID=40&md5=67929b36ac2e80a77ea7feea16201c13	Departamento de Pesquisa e Desenvolvimento, Instituto Internacional para Sustentabilidade (IIS), Estrada Dona Castorina, n°124, Rio de Janeiro, RJ, CEP: 22460-320, Brazil; Embrapa Solos (EMBRAPA), Rua Jardim Botânico, n°1024, Rio de Janeiro, RJ, CEP 22460-000, Brazil; Centro de Ciências Sociais, Departamento de Geografia e Meio Ambiente, Pontifícia Universidade Católica do Rio de Janeiro (PUC-RIO…	de Lima, A.P.M., Departamento de Pesquisa e Desenvolvimento, Instituto Internacional para Sustentabilidade (IIS), Estrada Dona Castorina, n°124, Rio de Janeiro, RJ, CEP: 22460-320, Brazil; Prado, R.B., Embrapa Solos (EMBRAPA), Rua Jardim Botânico, n°1024, Rio de Janeiro, RJ, CEP 22460-000, Brazil; Latawiec, A.E., Centro de Ciências Sociais, Departamento de Geografia e Meio Ambiente, Pontifícia Un…	The reduction of tropical forests has generated a loss of ecosystem services across the globe. In Brazil, essential biomes related to water provision (such as the Atlantic Forest and Savanna) have been degraded, compromising water-ecosystem services. Payment for water-ecosystem services (water PES) has been implemented as a tool to stimulate changes in the use and management of these areas. Many …	Indicators; Perspectives for water PES monitoring; Water PES monitoring gaps						Coordenação de Aperfeiçoamento de Pessoal de Nível Superior, CAPES; Conselho Nacional de Desenvolvimento Científico e Tecnológico, CNPq: 308536/2018-5	This study was financed by the Coordenação de Aperfeiçoamento de Pessoal de Nível Superior (CAPES)—Finance Code 00 and by National Council for Scientific and Technological Development – CNPq (308536/2018-5) is also gratefully acknowledged. We would like to thank Embrapa Solos, PUC Rio and International Institute for Sustainability (IIS-Rio) for the infrastructure that enabled the meetings, exchan…	This study was financed by the Coordena??o de Aperfei?oamento de Pessoal de N?vel Superior (CAPES)?Finance Code 001 and by National Council for Scientific and Technological Development ? CNPq (308536/2018-5) is also gratefully acknowledged. We would like to thank Embrapa Solos, PUC Rio and International Institute for Sustainability (IIS-Rio) for the infrastructure that enabled the meetings, excha…					(2009) Programa produtor de água: manual operativo, p. 67. , ANA (Brasil). Brasília; (2012) Manual operativo do programa produtor de água, p. 84. , ANA (Brasil). Brasília; (2013) Conjuntura dos recursos hídricos no Brasil, p. 432. , ANA (Brasil). Brasília; (2015) Conjuntura dos recursos hídricos: informe 2015, p. 88. , ANA (Brasil). Brasília; (2018) Conjuntura dos recursos hídricos no Brasil 2018…	de Lima, A.P.M.; Departamento de Pesquisa e Desenvolvimento, Estrada Dona Castorina, n°124, Brazil; email: a.lima@iis-rio.org			Institute for Environmental Research in Hydrographic Basins (IPABHi)					1980993X				English	Rev. Ambiente Agua	Article	Final	All Open Access, Gold, Green
Peralta Mahecha G., Alarcón García S.J., Garzón Camacho J.C., Neuta Niño D.F., Rodríguez Arregocés N.X.	57226346472;57204160424;57226364957;57226349610;57226367857;	Hydric shortage in the colombia’s city system: Environmental and territorial planning in the magdalena-cauca hydrographic area [Escassez de água no sistema urbano colombiano: O ordenamento ambiental e territorial na área hidrográfica magdalena-cauca] [Desabastecimiento hídrico en el sistema de ciudades de colombia: Ordenamiento ambiental y territorial en el área hidrográfica magdalena-cauca]	Exclude	-	2021	Cuadernos de Geografia: Revista Colombiana de Geografia	30	2		459	480			10.15446/rcdg.v30n2.88753	https://www.scopus.com/inward/record.uri?eid=2-s2.0-85111247289&doi=10.15446%2frcdg.v30n2.88753&partnerID=40&md5=a0d391fcf9a4bc62eb2ccd0a56a1e9f5	Universidad Nacional de Colombia, Bogotá, Colombia	Peralta Mahecha, G., Universidad Nacional de Colombia, Bogotá, Colombia; Alarcón García, S.J., Universidad Nacional de Colombia, Bogotá, Colombia; Garzón Camacho, J.C., Universidad Nacional de Colombia, Bogotá, Colombia; Neuta Niño, D.F., Universidad Nacional de Colombia, Bogotá, Colombia; Rodríguez Arregocés, N.X., Universidad Nacional de Colombia, Bogotá, Colombia	The article describes the problem of water shortage in the city system located in the most susceptible areas of the Magdalena-Cauca Hydrographic Area (known as ahmc by its initials in Spanish). On one hand, this problem is dealt with from the conceptual perspective of water ecosystem services, both the hydrological and water use cycles, in relation to water supply and environmental planning. On t…	Colombia’s city system; Ecosystem services; Environmental planning; Hydrographic basin; Hydrological cycle; Territorial planning; Water shortage; Water use cycle													El ciclo urbano del agua (2019) El ciclo ur-bano del agua, , https://www.fundacionaquae.org/el-ciclo-urbano-del-agua/, Aquae Fundación. Consultado el 05 de mayo de 2020; Arcila, Angela María, Valderrama, Carlos, de Ulloa, Patricia Chacón, Estado de fragmentación del bosque seco de la cuenca alta del río Cauca, Colombia (2012) Biota Colombiana, 13 (2), pp. 86-100; (2012) Gestión integral de aguas …	Peralta Mahecha, G.; Universidad Nacional de ColombiaColombia; email: gperaltam@unal.edu.co			Universidad Nacional de Colombia					0121215X				Spanish	Cuad. Geogr.	Article	Final	All Open Access, Gold
de Oliveira Rolo D.A.M., Gallardo A.L.C.F., Ribeiro A.P., Siqueira-Gay J.	57223084946;9044955400;36622772300;57194463970;	Local Society Perception on Ecosystem Services as an Adaptation Strategy in Urban Stream Recovery Programs in the City of São Paulo, Brazil	Exclude	-	2021	Environmental Management								10.1007/s00267-021-01471-0	https://www.scopus.com/inward/record.uri?eid=2-s2.0-85104711750&doi=10.1007%2fs00267-021-01471-0&partnerID=40&md5=fb096158038b101e6be626f0a0252425	Programa de Mestrado em Cidades Inteligentes e Sustentáveis, Uninove, São Paulo, Brazil; Escola Politécnica, Universidade de São Paulo, São Paulo, Brazil	de Oliveira Rolo, D.A.M., Programa de Mestrado em Cidades Inteligentes e Sustentáveis, Uninove, São Paulo, Brazil; Gallardo, A.L.C.F., Programa de Mestrado em Cidades Inteligentes e Sustentáveis, Uninove, São Paulo, Brazil, Escola Politécnica, Universidade de São Paulo, São Paulo, Brazil; Ribeiro, A.P., Programa de Mestrado em Cidades Inteligentes e Sustentáveis, Uninove, São Paulo, Brazil; Sique…	Recent public policies in developing countries have emerged to address challenges of delivering water-related ecosystem services in urban areas. Some initiatives, such as the Brazilian Plan for Adaptation to Climate Change (BPACC) highlights sustainable urban drainage as a key strategy for promoting sustainable cities, including ecosystem-based adaptation (EbA) measures. Despite the importance of…	Ecosystem-based adaptation (EbA) measures; Perception; Stakeholders engagement; Urban planning; Water ecosystem services	Climate change; Developing countries; Economic and social effects; Population statistics; Adaptation strategies; Adaptation to climate changes; Climate change adaptation; Ecosystem services; Literature reviews; Local environments; Semi structured interviews; Sustainable urban drainage; Ecosystems					Fundação de Amparo à Pesquisa do Estado de São Paulo, FAPESP: 2019/18988-9 –; Conselho Nacional de Desenvolvimento Científico e Tecnológico, CNPq: 303542/2020-9, 309358/2017-5	The second author gratefully acknowledges CNPq (the Brazilian National Council for Scientific and Technological Development - grant 309358/2017-5 and grant 303542/2020-9). The second author and the fourth author also gratefully acknowledge FAPESP (the State of São Paulo Research Foundation) – grant #2019/18988-9 – for the support to this research. The fourth author also gratefully acknowledges Ca…						Almenar, J.B., Elliot, T., Rugani, B., Philippe, B., gutierrez, T.N., Sonnemann, G., Geneletti, D., Nexus between nature-based solutions, ecosystem services and urban challenges (2019) Land Use Policy, 100, p. 104898; Andersson, E., langemeyer, J., Borgström, S., Mcphearson, T., Haase, D., kronenberg, J., Baró, F., Enabling green and blue infrastructure to improve contributions to human well-bein…	Gallardo, A.L.C.F.; Programa de Mestrado em Cidades Inteligentes e Sustentáveis, Brazil; email: amarilislcfgallardo@gmail.com			Springer					0364152X		EMNGD	33856561	English	Environ. Manage.	Article	Article in Press
Roque Guerrero J.V., Gomes A., di Lollo J.A., Lorandi R., Moschini L.E.	57200408710;7202385964;15026163200;6507766306;9334645200;	Geoecological Mapping to Identify Groundwater Ecosystem Services Conflicts in a Brazilian Municipality	Exclude	-	2021	Advances in Science, Technology and Innovation				59	63			10.1007/978-3-030-59320-9_14	https://www.scopus.com/inward/record.uri?eid=2-s2.0-85103561313&doi=10.1007%2f978-3-030-59320-9_14&partnerID=40&md5=a73b23099c309a7ae902161f7322c3dd	Department of Environmental Sciences, Federal University of São Carlos, São Carlos, Brazil; Department of Geography—CEGOT, University of Porto, Porto, Portugal; Department of Civil Engineering, São Paulo State University, Ilha Solteira, Brazil	Roque Guerrero, J.V., Department of Environmental Sciences, Federal University of São Carlos, São Carlos, Brazil; Gomes, A., Department of Geography—CEGOT, University of Porto, Porto, Portugal; di Lollo, J.A., Department of Civil Engineering, São Paulo State University, Ilha Solteira, Brazil; Lorandi, R., Department of Environmental Sciences, Federal University of São Carlos, São Carlos, Brazil; …	This study applies geoecological-based mapping techniques to identify the natural potential of the landscape to promote groundwater ecosystem services. In addition, this diagnosis analyzed its relationship with land use to identify groundwater geoethical conflicts in Brotas municipality, Brazil, which is completely included in the Guarani aquifer system, one of the largest world natural groundwat…	Ecosystem services; Geoethics; Groundwater management; Guarani aquifer system						Fundação de Amparo à Pesquisa do Estado de São Paulo, FAPESP	Acknowledgements This work was supported by #2016/19020-0, São Paulo Research Foundation (FAPESP).						Acayaba, F.D., (2017) Ocorrência De agrotóxicos Usados Na cana-de-açúcar Em Corpos d’água Do Estado De São Paulo, , Campinas State University, Campinas (MSc Thesis; Andualem, T.F., Demeke, G.G., Groundwater potential assessment using GIS and remote sensing: A case study of Gunatana landscape, upper Blue Nile Basin, Ethiopia (2019) J Hydrol Reg Stud, 24. , 2019; Brown, G., Raymond, C.M., Methods f…	Roque Guerrero, J.V.; Department of Environmental Sciences, Brazil; email: jvguerrero2@gmail.com			Springer Nature					25228714				English	Adv. Sci. Tech. Inno.	Book Chapter	Final
[truncated: 678 more columns]
