# Supplementary material for: Integrating Ecosystem Services into Risk Assessments for Drinking Water Protection
Source: MDPI journal article supplement (doi:10.3390/w14081180), 2022-04-07
Supplement: s1 [file s1 › Table S3.xlsx]

## Sheet: CICES_to_WSS
	CICES V5.1	2018-01-01
CICES Version 5.1							From CICES to WSS		WSS-list
Ssection	Section	Division	Group	Class	Code		The transformation, inclusion, exclusion of every service is presented.		SectionWSS	DivisionWSS	GroupWSS	ClassWSS	CodeCICES
Provisioning	Provisioning (Biotic)	Biomass	Cultivated terrestrial plants for nutrition, materials or energy	Cultivated terrestrial plants (including fungi, algae) grown for nutritional purposes	1.1.1.1				Exclusion	Exclusion	Exclusion	Exclusion	Exclusion
Provisioning	Provisioning (Biotic)	Biomass	Cultivated terrestrial plants for nutrition, materials or energy	Fibres and other materials from cultivated plants, fungi, algae and bacteria for direct use or processing (excluding genetic materials)	1.1.1.2				Exclusion	Exclusion	Exclusion	Exclusion	Exclusion
Provisioning	Provisioning (Biotic)	Biomass	Cultivated terrestrial plants for nutrition, materials or energy	Cultivated plants (including fungi, algae) grown as a source of energy	1.1.1.3				Exclusion	Exclusion	Exclusion	Exclusion	Exclusion
Provisioning	Provisioning (Biotic)	Biomass	Cultivated aquatic plants for nutrition, materials or energy	Plants cultivated by in- situ aquaculture grown for nutritional purposes	1.1.2.1				Provisioning	Biomass (aquatic)	Food	Cultivated plants or animals	1.1.2.1, 1.1.4.1
Provisioning	Provisioning (Biotic)	Biomass	Cultivated aquatic plants for nutrition, materials or energy	Fibres and other materials from in-situ aquaculture for direct use or processing (excluding genetic materials)	1.1.2.2				Provisioning	Biomass (aquatic)	Material	Fibres and other materials from cultivated plants or animals	1.1.2.2, 1.1.4.2
Provisioning	Provisioning (Biotic)	Biomass	Cultivated aquatic plants for nutrition, materials or energy	Plants cultivated by in- situ aquaculture grown as an energy source	1.1.2.3				Provisioning	Biomass (aquatic)	Energy	Cultivated plants or animals as an energy source	1.1.2.3, 1.1.4.3
Provisioning	Provisioning (Biotic)	Biomass	Reared animals for nutrition, materials or energy	Animals reared for nutritional purposes	1.1.3.1				Exclusion	Exclusion	Exclusion	Exclusion	Exclusion
Provisioning	Provisioning (Biotic)	Biomass	Reared animals for nutrition, materials or energy	Fibres and other materials from reared animals for direct use or processing (excluding genetic materials)	1.1.3.2				Exclusion	Exclusion	Exclusion	Exclusion	Exclusion
Provisioning	Provisioning (Biotic)	Biomass	Reared animals for nutrition, materials or energy	Animals reared to provide energy (including mechanical)	1.1.3.3				Exclusion	Exclusion	Exclusion	Exclusion	Exclusion
Provisioning	Provisioning (Biotic)	Biomass	Reared aquatic animals for nutrition, materials or energy	Animals reared by in-situ aquaculture for nutritional purposes	1.1.4.1				Provisioning	Biomass (aquatic)	Food	Cultivated plants or animals	1.1.2.1, 1.1.4.1
Provisioning	Provisioning (Biotic)	Biomass	Reared aquatic animals for nutrition, materials or energy	Fibres and other materials from animals grown by in-situ aquaculture for direct use or processing (excluding genetic materials)	1.1.4.2				Provisioning	Biomass (aquatic)	Material	Fibres and other materials from cultivated plants or animals	1.1.2.2, 1.1.4.2
Provisioning	Provisioning (Biotic)	Biomass	Reared aquatic animals for nutrition, materials or energy	Animals reared by in-situ aquaculture as an energy source	1.1.4.3				Provisioning	Biomass (aquatic)	Energy	Cultivated plants or animals as an energy source	1.1.2.3, 1.1.4.3
Provisioning	Provisioning (Biotic)	Biomass	Wild plants (terrestrial and aquatic) for nutrition, materials or energy	Wild plants (terrestrial and aquatic, including fungi, algae) used for nutrition	1.1.5.1				Provisioning	Biomass (aquatic)	Food	Wild plants or animals	1.1.5.1, 1.1.6.1
Provisioning	Provisioning (Biotic)	Biomass	Wild plants (terrestrial and aquatic) for nutrition, materials or energy	Fibres and other materials from wild plants for direct use or processing (excluding genetic materials)	1.1.5.2				Provisioning	Biomass (aquatic)	Material	Fibres and other materials from wild plants or animals	1.1.5.2, 1.1.6.2
Provisioning	Provisioning (Biotic)	Biomass	Wild plants (terrestrial and aquatic) for nutrition, materials or energy	Wild plants (terrestrial and aquatic, including fungi, algae) used as a source of energy	1.1.5.3				Provisioning	Biomass (aquatic)	Energy	Wild plants or animals as an energy source	1.1.5.3, 1.1.6.3
Provisioning	Provisioning (Biotic)	Biomass	Wild animals (terrestrial and aquatic) for nutrition, materials or energy	Wild animals (terrestrial and aquatic) used for nutritional purposes	1.1.6.1				Provisioning	Biomass (aquatic)	Food	Wild plants or animals	1.1.5.1, 1.1.6.1
Provisioning	Provisioning (Biotic)	Biomass	Wild animals (terrestrial and aquatic) for nutrition, materials or energy	Fibres and other materials from wild animals for direct use or processing (excluding genetic materials)	1.1.6.2				Provisioning	Biomass (aquatic)	Material	Fibres and other materials from wild plants or animals	1.1.5.2, 1.1.6.2
Provisioning	Provisioning (Biotic)	Biomass	Wild animals (terrestrial and aquatic) for nutrition, materials or energy	Wild animals (terrestrial and aquatic) used as a source of energy	1.1.6.3				Provisioning	Biomass (aquatic)	Energy	Wild plants or animals as an energy source	1.1.5.3, 1.1.6.3
Provisioning	Provisioning (Biotic)	Genetic material from all biota (including seed, spore or gamete production)	Genetic material from plants, algae or fungi	Seeds, spores and other plant materials collected for maintaining or establishing a population	1.2.1.1				Provisioning	Biomass (aquatic)	Genetic Material	Genetic material from all organisms	1.2.1.1, 1.2.1.2, 1.2.1.3, 1.2.2.1, 1.2.2.2, 1.2.2.3
Provisioning	Provisioning (Biotic)	Genetic material from all biota (including seed, spore or gamete production)	Genetic material from plants, algae or fungi	Higher and lower plants (whole organisms) used to breed new strains or varieties	1.2.1.2				Provisioning	Biomass (aquatic)	Genetic Material	Genetic material from all organisms	1.2.1.1, 1.2.1.2, 1.2.1.3, 1.2.2.1, 1.2.2.2, 1.2.2.3
Provisioning	Provisioning (Biotic)	Genetic material from all biota (including seed, spore or gamete production)	Genetic material from plants, algae or fungi	Individual genes extracted from higher and lower plants for the design and construction of new biological entities	1.2.1.3				Provisioning	Biomass (aquatic)	Genetic Material	Genetic material from all organisms	1.2.1.1, 1.2.1.2, 1.2.1.3, 1.2.2.1, 1.2.2.2, 1.2.2.3
Provisioning	Provisioning (Biotic)	Genetic material from all biota (including seed, spore or gamete production)	Genetic material from animals	Animal material collected for the purposes of maintaining or establishing a population	1.2.2.1				Provisioning	Biomass (aquatic)	Genetic Material	Genetic material from all organisms	1.2.1.1, 1.2.1.2, 1.2.1.3, 1.2.2.1, 1.2.2.2, 1.2.2.3
Provisioning	Provisioning (Biotic)	Genetic material from all biota (including seed, spore or gamete production)	Genetic material from animals	Wild animals (whole organisms) used to breed new strains or varieties	1.2.2.2				Provisioning	Biomass (aquatic)	Genetic Material	Genetic material from all organisms	1.2.1.1, 1.2.1.2, 1.2.1.3, 1.2.2.1, 1.2.2.2, 1.2.2.3
Provisioning	Provisioning (Biotic)	Genetic material from all biota (including seed, spore or gamete production)	Genetic material from organisms	Individual genes extracted from organisms for the design and construction of new biological entities	1.2.2.3				Provisioning	Biomass (aquatic)	Genetic Material	Genetic material from all organisms	1.2.1.1, 1.2.1.2, 1.2.1.3, 1.2.2.1, 1.2.2.2, 1.2.2.3
Provisioning	Provisioning (Biotic)	Other types of provisioning service from biotic sources	Other	Other	1.3.X.X				Provisioning	Support to other natural systems	Support to other natural systems
Provisioning	Provisioning (Abiotic)	Water	Surface water used for nutrition, materials or energy	Surface water for drinking	4.2.1.1				Provisioning	Water	Water for drinking	Water supply for humans	4.2.1.1, 4.2.2.1
Provisioning	Provisioning (Abiotic)	Water	Surface water used for nutrition, materials or energy	Surface water for drinking	4.2.1.1				Provisioning	Water	Water for drinking	Drinking water for animals	4.2.1.1, 4.2.2.1
Provisioning	Provisioning (Abiotic)	Water	Surface water used for nutrition, materials or energy	Surface water used as a material (non-drinking purposes)	4.2.1.2				Provisioning	Water	Water for non-drinking purpose	Irrigation	4.2.1.2, 4.2.2.2
Provisioning	Provisioning (Abiotic)	Water	Surface water used for nutrition, materials or energy	Surface water used as a material (non-drinking purposes)	4.2.1.2				Provisioning	Water	Water for non-drinking purpose	Water used as a material or other type of input into production and consumption	4.2.1.2, 4.2.2.2
Provisioning	Provisioning (Abiotic)	Water	Surface water used for nutrition, materials or energy	Freshwater surface water used as an energy source	4.2.1.3				Provisioning	Water	Energy	Hydropower	4.2.1.3
Provisioning	Provisioning (Abiotic)	Water	Surface water used for nutrition, materials or energy	Coastal and marine water used as energy source	4.2.1.4				Exclusion	Exclusion	Exclusion	Exclusion	Exclusion
Provisioning	Provisioning (Abiotic)	Water	Ground water for used for nutrition, materials or energy	Ground (and subsurface) water for drinking	4.2.2.1				Provisioning	Water	Water for drinking	Water supply for humans	4.2.1.1, 4.2.2.1
Provisioning	Provisioning (Abiotic)	Water	Ground water for used for nutrition, materials or energy	Ground (and subsurface) water for drinking	4.2.2.1				Provisioning	Water	Water for drinking	Drinking water for animals	4.2.1.1, 4.2.2.1
Provisioning	Provisioning (Abiotic)	Water	Ground water for used for nutrition, materials or energy	Ground water (and subsurface) used as a material (non-drinking purposes)	4.2.2.2				Provisioning	Water	Water for non-drinking purpose	Irrigation	4.2.1.2, 4.2.2.2
Provisioning	Provisioning (Abiotic)	Water	Ground water for used for nutrition, materials or energy	Ground water (and subsurface) used as a material (non-drinking purposes)	4.2.2.2				Provisioning	Water	Water for non-drinking purpose	Water used as a material or other type of input into production and consumption	4.2.1.2, 4.2.2.2
Provisioning	Provisioning (Abiotic)	Water	Ground water for used for nutrition, materials or energy	Ground water (and subsurface) used as an energy source	4.2.2.3				Exclusion	Exclusion	Exclusion	Exclusion	Exclusion
Provisioning	Provisioning (Abiotic)	Water	New	New					Provisioning	Water	Water for drinking	Reserve water sources	own description
Provisioning	Provisioning (Abiotic)	Water	New	New					Provisioning	Water	Energy	Groundwater and surface water as an energy source	own description based on 4.2.2.3
Provisioning	Provisioning (Abiotic)	Water	New	New					Provisioning	Water	Energy	Storage of heat and coolness	own description
Provisioning	Provisioning (Abiotic)	Water	New	New					Provisioning	Water	Water for transport	Water as a mean for transportation	own description
Provisioning	Provisioning (Abiotic)	Water	Other aqueous ecosystem outputs	Other	4.2.X.X				Exclusion	Exclusion	Exclusion	Exclusion	Exclusion
Provisioning	Provisioning (Abiotic)	Non-aqueous natural abiotic ecosystem outputs	Mineral substances used for nutrition, materials or energy	Mineral substances used for nutritional purposes	4.3.1.1				Exclusion	Exclusion	Exclusion	Exclusion	Exclusion
Provisioning	Provisioning (Abiotic)	Non-aqueous natural abiotic ecosystem outputs	Mineral substances used for nutrition, materials or energy	Mineral substances used for material purposes	4.3.1.2				Exclusion	Exclusion	Exclusion	Exclusion	Exclusion
Provisioning	Provisioning (Abiotic)	Non-aqueous natural abiotic ecosystem outputs	Mineral substances used for nutrition, materials or energy	Mineral substances used for as an energy source	4.3.1.3				Exclusion	Exclusion	Exclusion	Exclusion	Exclusion
Provisioning	Provisioning (Abiotic)	Non-aqueous natural abiotic ecosystem outputs	Non-mineral substances or ecosystem properties used for nutrition, materials or energy	Non-mineral substances or ecosystem properties used for nutritional purposes	4.3.2.1				Exclusion	Exclusion	Exclusion	Exclusion	Exclusion
Provisioning	Provisioning (Abiotic)	Non-aqueous natural abiotic ecosystem outputs	Non-mineral substances or ecosystem properties used for nutrition, materials or energy	Non-mineral substances used for materials	4.3.2.2				Exclusion	Exclusion	Exclusion	Exclusion	Exclusion
Provisioning	Provisioning (Abiotic)	Non-aqueous natural abiotic ecosystem outputs	Non-mineral substances or ecosystem properties used for nutrition, materials or energy	Wind energy	4.3.2.3				Exclusion	Exclusion	Exclusion	Exclusion	Exclusion
Provisioning	Provisioning (Abiotic)	Non-aqueous natural abiotic ecosystem outputs	Non-mineral substances or ecosystem properties used for nutrition, materials or energy	Solar energy	4.3.2.4				Exclusion	Exclusion	Exclusion	Exclusion	Exclusion
Provisioning	Provisioning (Abiotic)	Non-aqueous natural abiotic ecosystem outputs	Non-mineral substances or ecosystem properties used for nutrition, materials or energy	Geothermal	4.3.2.5				Provisioning	Water	Energy	Geothermal energy	4.3.2.5
Provisioning	Provisioning (Abiotic)	Non-aqueous natural abiotic ecosystem outputs	Other mineral or non-mineral substances or ecosystem properties used for nutrition, materials or energy	Other	4.3.2.6				Exclusion	Exclusion	Exclusion	Exclusion	Exclusion
Regulation & Maintenance	Regulation & Maintenance (Biotic)	Transformation of biochemical or physical inputs to ecosystems	Mediation of wastes or toxic substances of anthropogenic origin by living processes	Bio-remediation by micro-organisms, algae, plants, and animals	2.1.1.1				Regulating	Transformation of biochemical or physical inputs to ecosystems	Mediation of waste, toxic substances and nuisances	Through living processes	2.1.1.1, 2.1.1.2, 2.1.2.1
Regulation & Maintenance	Regulation & Maintenance (Biotic)	Transformation of biochemical or physical inputs to ecosystems	Mediation of wastes or toxic substances of anthropogenic origin by living processes	Filtration/sequestration/storage/accumulation by micro-organisms, algae, plants, and animals	2.1.1.2				Regulating	Transformation of biochemical or physical inputs to ecosystems	Mediation of waste, toxic substances and nuisances	Through living processes	2.1.1.1, 2.1.1.2, 2.1.2.1
Regulation & Maintenance	Regulation & Maintenance (Biotic)	Transformation of biochemical or physical inputs to ecosystems	Mediation of nuisances of anthropogenic origin	Smell reduction	2.1.2.1				Regulating	Transformation of biochemical or physical inputs to ecosystems	Mediation of waste, toxic substances and nuisances	Through living processes	2.1.1.1, 2.1.1.2, 2.1.2.1
Regulation & Maintenance	Regulation & Maintenance (Biotic)	Transformation of biochemical or physical inputs to ecosystems	Mediation of nuisances of anthropogenic origin	Noise attenuation	2.1.2.2				Exclusion	Exclusion	Exclusion	Exclusion	Exclusion
Regulation & Maintenance	Regulation & Maintenance (Biotic)	Transformation of biochemical or physical inputs to ecosystems	Mediation of nuisances of anthropogenic origin	Visual screening	2.1.2.3				Regulating	Transformation of biochemical or physical inputs to ecosystems	Mediation of waste, toxic substances and nuisances	Through other water related mediation	2.1.2.3, 5.1.2.1
Regulation & Maintenance	Regulation & Maintenance (Biotic)	Regulation of physical, chemical, biological conditions	Regulation of baseline flows, and extreme events	Control of erosion rates	2.2.1.1				Regulating	Regulation of physical, chemical, biological conditions	Regulation of baseline flows and extreme events	Erosion control	2.2.1.1
Regulation & Maintenance	Regulation & Maintenance (Biotic)	Regulation of physical, chemical, biological conditions	Regulation of baseline flows, and extreme events	Buffering and attenuation of mass movement	2.2.1.2				Exclusion	Exclusion	Exclusion	Exclusion	Exclusion
Regulation & Maintenance	Regulation & Maintenance (Biotic)	Regulation of physical, chemical, biological conditions	Regulation of baseline flows, and extreme events	Hydrological cycle and water flow regulation (Including flood control, and coastal protection)	2.2.1.3				Regulating	Regulation of physical, chemical, biological conditions	Regulation of baseline flows and extreme events	Flood protection	2.2.1.3, 5.2.1.2
Regulation & Maintenance	Regulation & Maintenance (Biotic)	Regulation of physical, chemical, biological conditions	Regulation of baseline flows, and extreme events	Hydrological cycle and water flow regulation (Including flood control, and coastal protection)	2.2.1.3				Regulating	Regulation of physical, chemical, biological conditions	Regulation of baseline flows and extreme events	Drought attenuation	own description based on 2.2.1.3
Regulation & Maintenance	Regulation & Maintenance (Biotic)	Regulation of physical, chemical, biological conditions	Regulation of baseline flows, and extreme events	Wind protection	2.2.1.4				Exclusion	Exclusion	Exclusion	Exclusion	Exclusion
Regulation & Maintenance	Regulation & Maintenance (Biotic)	Regulation of physical, chemical, biological conditions	Regulation of baseline flows, and extreme events	Protection from fire	2.2.1.5				Regulating	Regulation of physical, chemical, biological conditions	Regulation of baseline flows and extreme events	Fire protection	2.2.1.5
Regulation & Maintenance	Regulation & Maintenance (Biotic)	Regulation of physical, chemical, biological conditions	Lifecycle maintenance, habitat, and gene pool protection	Pollination (or 'gamete' dispersal in a marine context)	2.2.2.1				Regulating	Regulation of physical, chemical, biological conditions	Lifecycle maintenance, habitat and gene pool protection	Pollination and spreading of seeds by water	2.2.2.1, 2.2.2.2
Regulation & Maintenance	Regulation & Maintenance (Biotic)	Regulation of physical, chemical, biological conditions	Lifecycle maintenance, habitat, and gene pool protection	Seed dispersal	2.2.2.2				Regulating	Regulation of physical, chemical, biological conditions	Lifecycle maintenance, habitat and gene pool protection	Pollination and spreading of seeds by water	2.2.2.1, 2.2.2.2
Regulation & Maintenance	Regulation & Maintenance (Biotic)	Regulation of physical, chemical, biological conditions	Lifecycle maintenance, habitat, and gene pool protection	Maintaining nursery populations and habitats (Including gene pool protection)	2.2.2.3				Regulating	Regulation of physical, chemical, biological conditions	Lifecycle maintenance, habitat and gene pool protection	Maintaining populations and habitats	2.2.2.3
Regulation & Maintenance	Regulation & Maintenance (Biotic)	Regulation of physical, chemical, biological conditions	Pest, disease control	Pest control (including invasive species)	2.2.3.1				Regulating	Regulation of physical, chemical, biological conditions	Pest and disease control	Pest and disease control	2.2.3.1, 2.2.3.2
Regulation & Maintenance	Regulation & Maintenance (Biotic)	Regulation of physical, chemical, biological conditions	Pest, disease control	Disease control	2.2.3.2				Regulating	Regulation of physical, chemical, biological conditions	Pest and disease control	Pest and disease control	2.2.3.1, 2.2.3.2
Regulation & Maintenance	Regulation & Maintenance (Biotic)	Regulation of physical, chemical, biological conditions	Regulation of soil quality	Weathering processes and their effect on soil quality	2.2.4.1				Exclusion	Exclusion	Exclusion	Exclusion	Exclusion
Regulation & Maintenance	Regulation & Maintenance (Biotic)	Regulation of physical, chemical, biological conditions	Regulation of soil quality	Decomposition and fixing processes and their effect on soil quality	2.2.4.2				Exclusion	Exclusion	Exclusion	Exclusion	Exclusion
Regulation & Maintenance	Regulation & Maintenance (Biotic)	Regulation of physical, chemical, biological conditions	Water conditions	Regulation of the chemical condition of freshwaters by living processes	2.2.5.1				Regulating	Regulation of physical, chemical, biological conditions	Maintaining water conditions	Controlling the chemical quality of freshwater	2.2.5.1
Regulation & Maintenance	Regulation & Maintenance (Biotic)	Regulation of physical, chemical, biological conditions	Water conditions	Regulation of the chemical condition of salt waters by living processes	2.2.5.2				Exclusion	Exclusion	Exclusion	Exclusion	Exclusion
Regulation & Maintenance	Regulation & Maintenance (Biotic)	Regulation of physical, chemical, biological conditions	Atmospheric composition, and conditions	Regulation of chemical composition of atmosphere and oceans	2.2.6.1				Regulating	Regulation of physical, chemical, biological conditions	Atmospheric composition and conditions	Regulation of global climate	2.2.6.1, 5.2.1.3
Regulation & Maintenance	Regulation & Maintenance (Biotic)	Regulation of physical, chemical, biological conditions	Atmospheric composition, and conditions	Regulation of temperature and humidity, including ventilation and transpiration	2.2.6.2				Regulating	Regulation of physical, chemical, biological conditions	Atmospheric composition and conditions	Regulation of local temperature and humidity	2.2.6.2, 5.2.2.1
Regulation & Maintenance	Regulation & Maintenance (Biotic)	Other types of regulation and maintenance service by living processes	Other	Other	2.3.X.X				Regulating	Support to other natural systems	Support to other natural systems	Support to other natural systems
Regulation & Maintenance	Regulation & Maintenance (Abiotic)	Transformation of biochemical or physical inputs to ecosystems	Mediation of waste, toxics and other nuisances by non-living processes	Dilution by freshwater and marine ecosystems	5.1.1.1				Regulating	Transformation of biochemical or physical inputs to ecosystems	Mediation of waste, toxic substances and nuisances	Through dilution	5.1.1.1
Regulation & Maintenance	Regulation & Maintenance (Abiotic)	Transformation of biochemical or physical inputs to ecosystems	Mediation of waste, toxics and other nuisances by non-living processes	Dilution by atmosphere	5.1.1.2				Exclusion	Exclusion	Exclusion	Exclusion	Exclusion
Regulation & Maintenance	Regulation & Maintenance (Abiotic)	Transformation of biochemical or physical inputs to ecosystems	Mediation of waste, toxics and other nuisances by non-living processes	Mediation by other chemical or physical means (e.g. via Filtration, sequestration, storage or accumulation)	5.1.1.3				Regulating	Transformation of biochemical or physical inputs to ecosystems	Mediation of waste, toxic substances and nuisances	Through filtration	5.1.1.3
Regulation & Maintenance	Regulation & Maintenance (Abiotic)	Transformation of biochemical or physical inputs to ecosystems	Mediation of waste, toxics and other nuisances by non-living processes	Mediation by other chemical or physical means (e.g. via Filtration, sequestration, storage or accumulation)	5.1.1.3				Regulating	Transformation of biochemical or physical inputs to ecosystems	Mediation of waste, toxic substances and nuisances	Through sequestration	5.1.1.3
Regulation & Maintenance	Regulation & Maintenance (Abiotic)	Transformation of biochemical or physical inputs to ecosystems	Mediation of waste, toxics and other nuisances by non-living processes	Mediation by other chemical or physical means (e.g. via Filtration, sequestration, storage or accumulation)	5.1.1.3				Regulating	Transformation of biochemical or physical inputs to ecosystems	Mediation of waste, toxic substances and nuisances	Through storage or accumulation	5.1.1.3
Regulation & Maintenance	Regulation & Maintenance (Abiotic)	Transformation of biochemical or physical inputs to ecosystems	Mediation of nuisances of anthropogenic origin	Mediation of nuisances by abiotic structures or processes	5.1.2.1				Regulating	Transformation of biochemical or physical inputs to ecosystems	Mediation of waste, toxic substances and nuisances	Through other water related mediation	2.1.2.3, 5.1.2.1
Regulation & Maintenance	Regulation & Maintenance (Abiotic)	Regulation of physical, chemical, biological conditions	Regulation of baseline flows, and extreme events	Mass flows	5.2.1.1				Exclusion	Exclusion	Exclusion	Exclusion	Exclusion
Regulation & Maintenance	Regulation & Maintenance (Abiotic)	Regulation of physical, chemical, biological conditions	Regulation of baseline flows, and extreme events	Liquid flows	5.2.1.2				Regulating	Regulation of physical, chemical, biological conditions	Regulation of baseline flows and extreme events	Flood protection	2.2.1.3, 5.2.1.2
Regulation & Maintenance	Regulation & Maintenance (Abiotic)	Regulation of physical, chemical, biological conditions	Regulation of baseline flows, and extreme events	Liquid flows	5.2.1.2				Regulating	Regulation of physical, chemical, biological conditions	Regulation of baseline flows and extreme events	Prevention of subsidence	own description based on 5.2.1.2
Regulation & Maintenance	Regulation & Maintenance (Abiotic)	Regulation of physical, chemical, biological conditions	Regulation of baseline flows, and extreme events	Gaseous flows	5.2.1.3				Regulating	Regulation of physical, chemical, biological conditions	Atmospheric composition and conditions	Regulation of global climate	2.2.6.1, 5.2.1.3
Regulation & Maintenance	Regulation & Maintenance (Abiotic)	Regulation of physical, chemical, biological conditions	Maintenance of physical, chemical, abiotic conditions	Maintenance and regulation by inorganic natural chemical and physical processes	5.2.2.1				Regulating	Regulation of physical, chemical, biological conditions	Atmospheric composition and conditions	Regulation of local temperature and humidity	2.2.6.2, 5.2.2.1
Regulation & Maintenance	Regulation & Maintenance (Abiotic)	Other type of regulation and maintenance service by abiotic processes	Other	Other	5.3.X.X				Exclusion	Exclusion	Exclusion	Exclusion	Exclusion
Cultural	Cultural (Biotic)	Direct, in-situ and outdoor interactions with living systems that depend on presence in the environmental setting	Physical and experiential interactions with the natural environment	Characteristics of living systems that that enable activities promoting health, recuperation or enjoyment through active or immersive interactions	3.1.1.1				Cultural	Direct, in-situ and outdoor interactions that depend on presence in the environmental setting	Physical and experiential interactions with natural environment	Activities promoting health, recuperation or enjoyment through active, immersive, passive or observational interactions	3.1.1.1, 3.1.1.2, 6.1.1.1
Cultural	Cultural (Biotic)	Direct, in-situ and outdoor interactions with living systems that depend on presence in the environmental setting	Physical and experiential interactions with the natural environment	Characteristics of living systems that enable activities promoting health, recuperation or enjoyment through passive or observational interactions	3.1.1.2				Cultural	Direct, in-situ and outdoor interactions that depend on presence in the environmental setting	Physical and experiential interactions with natural environment	Activities promoting health, recuperation or enjoyment through active, immersive, passive or observational interactions	3.1.1.1, 3.1.1.2, 6.1.1.1
Cultural	Cultural (Biotic)	Direct, in-situ and outdoor interactions with living systems that depend on presence in the environmental setting	Intellectual and representative interactions with the natural environment	Characteristics of living systems that enable scientific investigation or the creation of traditional ecological knowledge	3.1.2.1				Cultural	Direct, in-situ and outdoor interactions that depend on presence in the environmental setting	Intellectual and representative interactions with natural environment	Scientific investigation, creation of traditional knowledge, education, training	3.1.2.1, 3.1.2.2, 6.1.2.1
Cultural	Cultural (Biotic)	Direct, in-situ and outdoor interactions with living systems that depend on presence in the environmental setting	Intellectual and representative interactions with the natural environment	Characteristics of living systems that enable education and training	3.1.2.2				Cultural	Direct, in-situ and outdoor interactions that depend on presence in the environmental setting	Intellectual and representative interactions with natural environment	Scientific investigation, creation of traditional knowledge, education, training	3.1.2.1, 3.1.2.2, 6.1.2.1
Cultural	Cultural (Biotic)	Direct, in-situ and outdoor interactions with living systems that depend on presence in the environmental setting	Intellectual and representative interactions with the natural environment	Characteristics of living systems that are resonant in terms of culture or heritage	3.1.2.3				Cultural	Direct, in-situ and outdoor interactions that depend on presence in the environmental setting	Intellectual and representative interactions with natural environment	Culture or heritage	3.1.2.3, 6.1.2.1
Cultural	Cultural (Biotic)	Direct, in-situ and outdoor interactions with living systems that depend on presence in the environmental setting	Intellectual and representative interactions with the natural environment	Characteristics of living systems that enable aesthetic experiences	3.1.2.4				Cultural	Direct, in-situ and outdoor interactions that depend on presence in the environmental setting	Intellectual and representative interactions with natural environment	Aesthetic experiences	3.1.2.4, 6.1.2.1
Cultural	Cultural (Biotic)	Indirect, remote, often indoor interactions with living systems that do not require presence in the environmental setting	Spiritual, symbolic, and other interactions with natural environment	Elements of living systems that have symbolic meaning	3.2.1.1				Cultural	Indirect, remote, often indoor interactions that do not require presence in the environmental setting	Spiritual, symbolic and other interactions with natural environment	Religious, sacred or symbolic meaning	3.2.1.1, 3.2.1.2, 6.2.1.1
Cultural	Cultural (Biotic)	Indirect, remote, often indoor interactions with living systems that do not require presence in the environmental setting	Spiritual, symbolic, and other interactions with natural environment	Elements of living systems that have sacred or religious meaning	3.2.1.2				Cultural	Indirect, remote, often indoor interactions that do not require presence in the environmental setting	Spiritual, symbolic and other interactions with natural environment	Religious, sacred or symbolic meaning	3.2.1.1, 3.2.1.2, 6.2.1.1
Cultural	Cultural (Biotic)	Indirect, remote, often indoor interactions with living systems that do not require presence in the environmental setting	Spiritual, symbolic, and other interactions with natural environment	Elements of living systems used for entertainment or representation	3.2.1.3				Exclusion	Exclusion	Exclusion	Exclusion	Exclusion
Cultural	Cultural (Biotic)	Indirect, remote, often indoor interactions with living systems that do not require presence in the environmental setting	Other biotic characteristics that have a non-use value	Characteristics or features of living systems that have an existence value	3.2.2.1				Cultural	Indirect, remote, often indoor interactions that do not require presence in the environmental setting	Other biotic or abiotic characteristics that have a non-use value	Existence, bequest or option value	3.2.2.1, 3.2.2.2, 6.2.2.1
Cultural	Cultural (Biotic)	Indirect, remote, often indoor interactions with living systems that do not require presence in the environmental setting	Other biotic characteristics that have a non-use value	Characteristics or features of living systems that have an option or bequest value	3.2.2.2				Cultural	Indirect, remote, often indoor interactions that do not require presence in the environmental setting	Other biotic or abiotic characteristics that have a non-use value	Existence, bequest or option value	3.2.2.1, 3.2.2.2, 6.2.2.1
Cultural	Cultural (Biotic)	Other characteristics of living systems that have cultural significance	Other	Other	3.3.X.X				Cultural	Support to other natural systems	Support to other natural systems	Support to other natural systems
Cultural	Cultural (Abiotic)	Direct, in-situ and outdoor interactions with natural physical systems that depend on presence in the environmental setting	Physical and experiential interactions with natural abiotic components of the environment	Natural, abiotic characteristics of nature that enable active or passive physical and experiential interactions	6.1.1.1				Cultural	Direct, in-situ and outdoor interactions that depend on presence in the environmental setting	Physical and experiential interactions with natural environment	Activities promoting health, recuperation or enjoyment through active, immersive, passive or observational interactions	3.1.1.1, 3.1.1.2, 6.1.1.1
Cultural	Cultural (Abiotic)	Direct, in-situ and outdoor interactions with natural physical systems that depend on presence in the environmental setting	Intellectual and representative interactions with abiotic components of the natural environment	Natural, abiotic characteristics of nature that enable intellectual interactions	6.1.2.1				Cultural	Direct, in-situ and outdoor interactions that depend on presence in the environmental setting	Intellectual and representative interactions with natural environment	Scientific investigation, creation of traditional knowledge, education, training	3.1.2.1, 3.1.2.2, 6.1.2.1
Cultural	Cultural (Abiotic)	Direct, in-situ and outdoor interactions with natural physical systems that depend on presence in the environmental setting	Intellectual and representative interactions with abiotic components of the natural environment	Natural, abiotic characteristics of nature that enable intellectual interactions	6.1.2.1				Cultural	Direct, in-situ and outdoor interactions that depend on presence in the environmental setting	Intellectual and representative interactions with natural environment	Culture or heritage	3.1.2.3, 6.1.2.1
Cultural	Cultural (Abiotic)	Direct, in-situ and outdoor interactions with natural physical systems that depend on presence in the environmental setting	Intellectual and representative interactions with abiotic components of the natural environment	Natural, abiotic characteristics of nature that enable intellectual interactions	6.1.2.1				Cultural	Direct, in-situ and outdoor interactions that depend on presence in the environmental setting	Intellectual and representative interactions with natural environment	Aesthetic experiences	3.1.2.4, 6.1.2.1
Cultural	Cultural (Abiotic)	Indirect, remote, often indoor interactions with physical systems that do not require presence in the environmental setting	Spiritual, symbolic and other interactions with the abiotic components of the natural environment	Natural, abiotic characteristics of nature that enable spiritual, symbolic and other interactions	6.2.1.1				Cultural	Indirect, remote, often indoor interactions that do not require presence in the environmental setting	Spiritual, symbolic and other interactions with natural environment	Religious, sacred or symbolic meaning	3.2.1.1, 3.2.1.2, 6.2.1.1
Cultural	Cultural (Abiotic)	Indirect, remote, often indoor interactions with physical systems that do not require presence in the environmental setting	Spiritual, symbolic and other interactions with the abiotic components of the natural environment	Natural, abiotic characteristics of nature that enable spiritual, symbolic and other interactions	6.2.1.1				Cultural	Indirect, remote, often indoor interactions that do not require presence in the environmental setting	Spiritual, symbolic and other interactions with natural environment	Entertainment or representation	3.2.1.3, 6.2.1.1
Cultural	Cultural (Abiotic)	Indirect, remote, often indoor interactions with physical systems that do not require presence in the environmental setting	Other abiotic characteristics that have a non-use value	Natural, abiotic characteristics or features of nature that have either an existence, option or bequest value	6.2.2.1				Cultural	Indirect, remote, often indoor interactions that do not require presence in the environmental setting	Other biotic or abiotic characteristics that have a non-use value	Existence, bequest or option value	3.2.2.1, 3.2.2.2, 6.2.2.1
Cultural	Cultural (Abiotic)	Other abiotic characteristics of nature that have cultural significance	Other	Other	6.3.X.X				Exclusion	Exclusion	Exclusion	Exclusion	Exclusion
