# Supplementary material for: Integrating Ecosystem Services into Risk Assessments for Drinking Water Protection
Source: MDPI journal article supplement (doi:10.3390/w14081180), 2022-04-07
Supplement: s1 [file s1 › Table S4.xlsx]

## Sheet: Overview
S4: Identification and Quantification of WSS in the Case Study Area
Content	Content
1 Identification of Water System Services
1.1 Provisioning Services	Assessing which water system services are/aren't present at the site and what they are
1.2 Regulating Services
1.3 Cultural Services
1.4 Overview of all provided services today	Summary of all provided services today
2 Supply/demand of Services
2.1 Supply/demand today	Supply/demand of services today (reference scenario)
2.2 Supply/demand under the mitigation scenario	Supply/demand of services after the mitigation measures have been implemented (scenario 1)
Case Study description
Case Study description

## Sheet: Provisioning_Services
Division	Group	Ref. number (CICES)	Class	Important for small GWBs in general?	Important for case study?	Services in the case study	Reason for exclusion if applicable	Data Source	Examples of services (literature)
Biomass (aquatic)	Food	(1.1.2.1, 1.1.4.1)	Cultivated plants or animals	0	0	-	n/a for GW, plants or animals do not grow directly in the groundwater	-	− Crayfish
									− Char
									− Eel
									− Rainbow trout
									− Steelhead trout
		(1.1.5.1, 1.1.6.1)	Wild plants or animals	0	0	-	n/a for GW, plants or animals do not grow directly in the groundwater	-	− Perch, pike, zander, rainbow trout, char
									− Watercress
	Material	(1.1.2.2, 1.1.4.2)	Fibres and other materials from cultivated plants or animals	0	0	-	n/a for GW, plants or animals do not grow directly in the groundwater	-	−
		(1.1.5.2, 1.1.6.2)	Fibres and other materials from wild plants or animals	0	0	-	n/a for GW, plants or animals do not grow directly in the groundwater	-	− Jewellery with fish scales as adornment
	Energy	(1.1.5.3, 1.1.6.3)	Cultivated plants or animals as an energy source	0	0	-	n/a for GW, plants or animals do not grow directly in the groundwater	-	− Reed canary grass for biofuel (fuel pellets)
									− Biogas from aquaculture waste
		(1.1.2.3, 1.1.4.3)	Wild plants or animals as an energy source	0	0	-	n/a for GW, plants or animals do not grow directly in the groundwater	-	−
	Genetic Material	(1.2.1.1, 1.2.1.2, 1.2.1.3, 1.2.2.1, 1.2.2.2, 1.2.2.3)	Genetic material from all organisms	0	0	-	n/a for GW, plants or animals do not grow directly in the groundwater	-	− Wild animals that we can use for breeding
									− Plants, fungi or algae that we can use for breeding
Water	Water for drinking	(4.2.1.1, 4.2.2.1)	Municipal and private water supply, for humans	1	1	1.) Municipal DW supply: 740 m3/d 2.) Household wells: 68	-	1.) Lerum Municipality 2.) SGU ⇒ well data ⇒ household wells	− Potable water in public supply system
									− Potable water using private wells
									− Mineral water
		(4.2.1.1, 4.2.2.1)	Drinking water for animals	1	1	3.) Water for grazing horses	-	SWECO report	− Water source for wild animals
									− Water source for livestock
		(own description)	Reserve water source	1	0	-	Not listed as a reserve water source	Lerum municipality	− Potable water system if existing source cannot be used
									− Potable water system in the future (e.g. if the demand increases)
	Water for non-drinking purpose	(4.2.1.2, 4.2.2.2)	Irrigation	1	1	4.) Irrigation well: 1	-	4.) Swedish Geological Survey ⇒ well data ⇒ irrigation wells	− Land irrigated by controlled flooding
									− Irrigated temporary grass land, cereals, potatoes, sugar beet, etc.
		(4.2.1.2, 4.2.2.2)	Cooling	1	0	-	no industry in proximity which uses GW	Zeus ⇒ Fastighetskartan ⇒ Urbanized Areas ⇒ mb-south-layer	− Water as cooling water in industrial facilities
									− District cooling
		(4.2.1.2, 4.2.2.2)	Water used as a material, e.g. process water	1	0	-	no industry in proximity which uses GW	Zeus ⇒ Fastighetskartan ⇒ Urbanized Areas ⇒ mb-south-layer	− Water for washing (in industrial processes)
									− Water for mortar
									− Water for district heating
	Energy	(4.2.1.3)	Hydropower	0	0	-	n/a for GW	-	− Production of electricity
		(4.3.2.5)	Geothermal energy	1	0	-	no indication for geothermal energy (drillings not deep enough)	Swedish Geological Survey ⇒ well data ⇒ energy wells specification	− Production of electricity
									− Heating
		(4.2.2.3, own description)	Groundwater and surface water as an energy source	1	1	5.) Heat pumps: 349	-	5.) Swedish Geological Survey ⇒ well data ⇒ energy wells specification	− Groundwater source heat pump
		(own description [4.3.2.6])	Storage of heat and coolness	0	0	-		SGU ⇒ well data ⇒ energy wells (bore depth must be very deep)	− Seasonal heating and cooling of facilities, e.g. Arlanda airport
	Water for transport	own description	Water as a mean for transportation	0	0	-	n/a for GW	-	− Water bodies as a waterway for ships
									− Frozen surface water bodies as winter ways for vehicles
Support to terrestrial ecosystems				1	0	-	-	-	−

## Sheet: Regulating_Services
Division	Group	Ref. number (CICES)	Class	Important for small GWBs in general?	Important for case study?	Services in the case study	Reason for exclusion if applicable	Data Source	Monetization	Examples of services (literature)
Transformation of biochemical or physical inputs to ecosystems	Mediation of waste, toxic substances and nuisances	(2.1.1.1, 2.1.1.2, 2.1.2.1)	Through living processes	1	0	-	n/a for GW, GW not used as a receiving water body for waste, toxic substances etc.	-	-
		(5.1.1.1)	Through dilution	1	0	-	n/a for GW, GW not used as a receiving water body for waste, toxic substances etc.	-	-
		(5.1.1.3)	Through filtration	1	0	-	n/a for GW, GW not used as a receiving water body for waste, toxic substances etc.	-	-
		(5.1.1.3)	Through sequestration	1	0	-	n/a for GW, GW not used as a receiving water body for waste, toxic substances etc.	-	-
		(5.1.1.3)	Through storage or accumulation	1	0	-	n/a for GW, GW not used as a receiving water body for waste, toxic substances etc.	-	-
		(2.1.2.3, 5.1.2.1)	Through visual cover	0	0	-	n/a for GW	-	-
Regulation of physical, chemical, biological conditions	Regulation of baseline flows and extreme events	(2.2.1.1)	Erosion control	0	0	-	n/a for GW	-	-
		(2.2.1.3, 5.2.1.2)	Flood protection	0	0	-	n/a for GW	-	-
		(own description [5.2.1.2])	Prevention of subsidence	1	1	6.) 95 houses and 65 extensions (garage etc.) on top of the clay layer; 573 dwellings in total on top of aquifer	-	6.) Zeus ⇒ Fastighetskartan ⇒ Urbanized Areas ⇒ by-14-layer (clipped with clay layer-file)	Replacement costs: Real estate prices
		(2.2.1.3)	Drought attenuation	0	0	-	n/a for GW; no direct influence from GW-body	-	-
		(2.2.1.5)	Fire protection	0	0	-	n/a for GW; no direct influence from GW-body	-	-
	Lifecycle maintenance, habitat and gene pool protection	(2.2.2.1, 2.2.2.2)	Pollination and spreading of seeds by water	0	0	-	n/a for GW	-	-
		(2.2.2.3)	Maintaining populations and habitats	0	0	-	n/a for GW	-	-
	Pest and disease control	(2.2.3.1, 2.2.3.2)	Pest and disease control	0	0	-	n/a for GW	-	-
	Maintaining water conditions	(2.2.5.1)	Controlling the chemical quality of freshwater	1	1	7.) GW-body feeds nearby river	-	7.) Derived from maps and observation	Evaluation in physical units: Monetization not possible
	Atmospheric composition and conditions	(2.2.6.1, 5.2.1.3)	Regulation of global climate	0	0	-	n/a for GW	-	-
		(2.2.6.2, 5.2.2.1)	Regulation of local temperature and humidity	1	1	8.) Springs regulating local temperature and humidity	-	8.) SGU ⇒ spring data	Evaluation in physical units: Monetization not possible
Support to terrestrial ecosystems				1	0	-	-	-	-

## Sheet: Cultural_Services
Division	Group	Ref. number	Class	Important for small GWBs in general?	Important for case study?	Services in the case study	Reason for exclusion if applicable	Data Source	Monetization	Examples of services (literature)
Direct, in-situ and outdoor interactions that depend on presence in the environmental setting	Physical and experiential interactions with natural environment	(3.1.1.1, 3.1.1.2, 6.1.1.1)	Activities promoting health, recuperation or enjoyment through active, immersive, passive or observational interactions	1	1	9.) Hiking in the green area around the spring	-	9.) SGU ⇒ spring data	Stated preference with interviews/questionnaires or revealed preferences ith travel cost and hedonic pricing	− Tourism and recreation through e.g. fishing, swimming, nature watching, cave tourism, skating and skiing
	Intellectual and representative interactions with natural environment	(3.1.2.1, 3.1.2.2, 6.1.2.1)	Scientific investigation, creation of traditional ecological knowledge, education, training	1	0	-	no indication for observation wells	SGU ⇒ well data	Stated preference with interviews/questionnaires	− Scientific studies − Outdoor education and excursions
		(3.1.2.3, 6.1.2.1)	Culture or heritage	1	0	-	there are cultural sites but they are not related to the GW-source	Zeus ⇒ Fastighetskartan ⇒ Plans, Regulations and Rights ⇒ Ancient remains⇒ly-riks-layer Zeus ⇒ Fastighetskartan ⇒ Plans, Regulations and Rights ⇒ Cultural historical remains⇒gy-riks-layer	-	− Historical understanding through e.g. agricultural landscapes, historical activities e.g. log driving and historical artefacts e.g. water mills
		(3.1.2.4, 6.1.2.1)	Aesthetic experiences	1	1	10.) Looking at the springs	-	10.) SGU ⇒ spring data	Stated preference with interviews/questionnaires or revealed preferences ith travel cost and hedonic pricing	− Sites of great beauty
Indirect, remote, often indoor interactions that do not require presence in the environmental setting	Spiritual, symbolic and other interactions with natural environment	(3.2.1.1, 3.2.1.2, 6.2.1.1)	Religious, sacred or symbolic meaning	1	0	-	no indication that springs are sacred	Zeus ⇒ Fastighetskartan ⇒ Plans, Regulations and Rights ⇒ Ancient remains⇒ly-riks-layer Zeus ⇒ Fastighetskartan ⇒ Plans, Regulations and Rights ⇒ Cultural historical remains⇒gy-riks-layer Google Maps data (scraped with Python, category of religious point)	-	− Sacred springs
		(3.2.1.3, 6.2.1.1)	Entertainment or representation	1	0	-	no indication that springs are used for entertainment or representation	Google Maps data (scraped with Python, category of entertainment)	-	− Possibility for amusement or enjoyment via different media
	Other biotic or abiotic characteristics that have a non-use value	(3.2.2.1, 3.2.2.2, 6.2.2.1)	Existence, bequest or option value	1	1	11.) Option value	-	Ann: - Maintaining the GW-quality and quantity even if there is little or no likelihood of the individual actually ever using it - Uncertainty about future supply (the continued existence of quantity and quality) - Information on bequest and option value was not available to make a detailed analysis so it is assumed to be constant	Stated preference methods	− Existence of species, landscape elements, etc.
Support to terrestrial ecosystems					0	-	-	-		−

## Sheet: Services_today
	Division	Group	Class	Services in the case study
Provisioning Services	Water	Water for drinking	Municipal and private water supply, for humans	1.) Municipal DW supply
				2.) Household wells
			Drinking water for animals	3.) Water for grazing horses
		Water for non-drinking purpose	Irrigation	4.) Irrigation of garden with well
		Energy	Groundwater and surface water as an energy source	5.) Heat pumps
Regulating Services	Regulation of physical, chemical, biological conditions	Regulation of baseline flows and extreme events	Prevention of subsidence	6.) Stable GW-level prevents subsidence of dwellings
		Maintaining water conditions	Controlling the chemical quality of freshwater	7.) GW-body feeds nearby river
		Atmospheric composition and conditions	Regulation of local temperature and humidity	8.) Springs regulating local temperature and humidity
Cultural Services	Direct, in-situ and outdoor interactions that depend on presence in the environmental setting	Physical and experiential interactions with natural environment	Activities promoting health, recuperation or enjoyment through active, immersive, passive or observational interactions	9.) Hiking in the green area around the spring
		Intellectual and representative interactions with natural environment	Aesthetic experiences	10.) Looking at the springs
	Indirect, remote, often indoor interactions that do not require presence in the environmental setting	Other biotic or abiotic characteristics that have a non-use value	Existence, bequest or option value	11.) Option value

## Sheet: SupplyDemand_of_Services_today
	WSS	Description	Unit	Supplyactual	Supplymax	Demandhuman	Demandmax	Supply rate	Supply-demand ratio
Provisioning services	Municipal and private water supply for humans	Municipal drinking water supply	m³/d	740	850	740	1900	0.870588	0
		Household wells	# of wells	68	100	68	573	0.68	0
	Drinking water for animals	Water for grazing horses	# of establishments	1	5	1	3	0.2	0
	Irrigation	Irrigation of gardens	# of wells	1	10	45	573	0.1	-0.150943
	Groundwater and surface water as an energy source	Heat pumps	# of heat pumps	349	400	500	573	0.8725	-0.31038
Regulating services	Prevention of subsidence	Stable groundwater level prevents subsidence of dwellings	dwellings on top of clay layer	95	95	95	95	1	0
	Controlling of chemical freshwater quality	Groundwater feeds nearby river and small watercourses		1	1	1	1	1	0
	Regulation of local temperature and humidity	Springs regulate local temperature and humidity	temperature difference in K	2.1	6	2.1	7	0.35	0
Cultural services	Activities promoting health, recuperation, or enjoyment through active, immersive, passive, or observational interactions	Hiking in the area around the spring	visitors	200	400	200	8021	0.5	0
	Aesthetic experiences	Looking at springs	visitors	200	400	200	8021	0.5	0
	Existence, bequest, or option value	Option value		1	1	1	1	1	0

## Sheet: SupplyDemand_of_Services_Scenar
	WSS	Description	Unit	Supplyactual	Supplymax	Demandhuman	Demandmax	Supply rate	Supply-demand ratio
Provisioning services	Municipal and private water supply for humans	Municipal drinking water supply	m³/d	800	850	740	1900	0.941176	0.0436364			Scenario = no heat pumps in the recharge/protection area and mitigation of overabstraction (no household wells in the recharge/protection area)
		Household wells	# of wells	60	100	68	573	0.6	-0.0237741
	Drinking water for animals	Water for grazing horses	# of establishments	1	5	1	3	0.2	0
	Irrigation	Irrigation of gardens	# of wells	1	10	45	573	0.1	-0.150943
	Groundwater and surface water as an energy source	Heat pumps	# of heat pumps	316	400	500	573	0.79	-0.378212
Regulating services	Prevention of subsidence	Stable groundwater level prevents subsidence of dwellings	dwellings on top of clay layer	95	95	95	95	1	0
	Controlling of chemical freshwater quality	Groundwater feeds nearby river and small watercourses		1	1	1	1	1	0
	Regulation of local temperature and humidity	Springs regulate local temperature and humidity	temperature difference in K	4	6	2.1	7	0.666667	0.292308
Cultural services	Activities promoting health, recuperation, or enjoyment through active, immersive, passive, or observational interactions	Hiking in the area around the spring	visitors	200	400	200	8021	0.5	0
	Aesthetic experiences	Looking at springs	visitors	200	400	200	8021	0.5	0
	Existence, bequest, or option value	Option value		1	1	1	1	1	0

## Sheet: CaseStudyDescription
The aquifer is a large glacifluvial deltaic deposit of the so-called Skallsjödelta and consists of sand with gravel elements. The soil sediment depth varies between 0 m and 45 m, and the unsaturated zone diverges from only a few meters in the Eastern part up to 20 m in the West. Several layers contain glaciomarine clay in the glacial material at different depths, but their extent remains not full…
