# Supplementary material for: Integrating Ecosystem Services into Risk Assessments for Drinking Water Protection
Source: MDPI journal article supplement (doi:10.3390/w14081180), 2022-04-07
Supplement: s1 [file s1 › Table S5.xlsx]

## Sheet: Hazard_Assessment
											Legend:
											Type of Hazard	Biolog.: biological Chemic.: chemical Rad./ phys.: radiological or physical (including turbidity) Unavail.: insufficient availability of water supplied to customers Safety: safety to personnel External damage: external damage to third parties, including liability
Considered hazards are based on the TECHNEAU database [Reference to the database: Beuken, R.; Reinoso, M.; Sturn, S.; Kiefer, J.; Bondelind, M.; Aström, J.; Lindhe, A.; Losén, L.; Petterson, T.; Machenbach, I.; et al. Identification and description of hazards for water supply systems. Techneau 2008, 79]											Potential Consequences	Description of potential consequences of the hazard to other sub-systems at firstly and the consumer secondly.
TECHNEAU - database						Case study site
Hazard	Reference	Hazardous Event	Type of Hazardous Event	Type of Hazard	Potential Consequences	Present in case study site?	Hazards	Specific threat	Data Source for Determination	Specific layer description for users familiar with Swedish land use data
Contamination of aquifers	2.1.1	Contamination by industrial operations (including continuous discharge as well as installations, construction work and other)	E	Biol., Chemic., Rad/phys.	Contaminated water (pathogens, chemicals, radionucleids)	1	1.) Tire and car company 2.) Car service	• oil leaking from the chop shop • runoff from vehicle wash with degreaser • Handling of petroleum products	Google Maps data (categorized into hazard categories)	Google Maps data (categorized into hazard categories)
Contamination of aquifers	2.1.2	Contamination by waste water (e.g. by WWTP, sewers, latrines, sewage collection pipes passed through catchment area, etc.)	E	Biol., Chemic.,	Contaminated water (pathogens, chemicals). Nutrient load in water.	1	3.) Sewage network	• Microbiological contamination (pathogenes from OS-WWTP) • load of nutrients (nitrogen and phosphorus)	Data from the land registry on urbanized areas	Zeus ⇒ Fastighetskartan ⇒ Urbanized Areas ⇒ ba-riks-layer
Contamination of aquifers	2.1.3	Leaching of contaminants by built constructions (e.g. landfills using waste or contaminated ground, dumpsites, traffic facilities, installations for handling, storage and deposition of waste materials or excavation residues, etc.)	E	Biol., Chemic.,	Contaminated water (chemicals)	0	­	­	Data from the land registry on urbanized areas	Zeus ⇒ Fastighetskartan ⇒ Urbanized Areas ⇒ ba-riks-layer
Contamination of aquifers	2.1.4	Traffic, incl. accidents (railway tracks, airfields, roads, parking areas, petrol filling stations, air accidents), loss of oil by cars or boats	E	Biol., Chemic.,	Contaminated water (chemicals)	1	4.) Road E20 (2500m through the catchment)	Road E20: • Accidents with dangerous goods • Road runoff (diverted and infiltrates into open ponds) • Road salt (chloride input to GW)	Land registry data on the transport network Gas stations: GoogleMaps data	Fastighetskartan ⇒ Transport ⇒ vl-layer Gas stations: GoogleMaps data
Contamination of aquifers	2.1.5	Construction activities with interference in subsoil (e.g. waterway construction, installations for handling or storage of hazardous substances, facilities for construction workers; etc.) (incl. accidents)	E	Chemic., Unavailability	Contaminated water (chemicals). Insufficient raw water	1	5.) 33 Heat pumps	• chemical contamination with antifreeze from heat pump construction/operation	Data on energy wells from the Swedish Geological Survey	Swedish Geological Survey ⇒ well data ⇒ energy wells
Contamination of aquifers	2.1.6	Increase of vulnerability due to mining activities, gravel pits, excavations uncovering the GW, construction of facilities for geothermal power purposes and /or small water supply systems	E	Biol., Chemic., Rad/phys.	Contaminated water (chemicals, radionucleids)	0	­	­	Data from the land registry on urbanized areas	Zeus ⇒ Fastighetskartan ⇒ Urbanized Areas ⇒ ba-riks-layer
Contamination of aquifers	2.1.7	Agricultural runoff and leach-out containing fertilizers, sludge, herbicides, etc.	E	Biol., Chemic.,	Contaminated water (pathogens, chemicals). Nutrient load in water.	1	6.) Cultivated land right next to the well 7.) Football field	6., 7.) pesticides 6.) fertilizer (commercial fertilizers (chemically produced) and natural fertilizers (animal waste)) --> nutrient load in GW	Data from the land registry on urbanized areas	Zeus ⇒ Fastighetskartan ⇒ Land data ⇒ ma-south-layer
Contamination of aquifers	2.1.8	Manure spread or cattle in the zone	E	Biol., Chemic.,	Contaminated water (pathogens). Nutrient load in water.	1	6.) Cultivated land right next to the well	• natural fertilizers (manure spread) • nutrient load in GW	Data from the land registry on land use and land cover	Zeus ⇒ Fastighetskartan ⇒ Land data ⇒ ma-south-layer
Contamination of aquifers	2.1.9	Geophysical incidents (e.g. extreme hydraulic events such as torrential rain, floods, erosion, landslides, karstic land surface with open dolines; etc.)	D, E	Biol., Chemic.,	Contaminated water (pathogens, chemicals)	0	­	­	Experts familiar with the area
Contamination of aquifers	2.1.10	Accidents or spreading out of hazardous materials during recreational activities (e.g. mass rallies, fish ponds, shooting galleries, sports facilities incl. motor sports, horse-race grounds, zoo/animal reserves, camps, campsites; etc.), or military field exercises and training areas.	E	Biol., Chemic.,	Contaminated water (pathogens, chemicals)	1	8.) Motocross tracks	• Spill of petroleum due to accident	Data from the land registry on urbanized areas	Zeus ⇒ Fastighetskartan ⇒ Urbanized Areas ⇒ ba-riks-layer
Contamination of aquifers	2.1.11	Contamination by forestry activities, wild life activities, natural fowls, dead animals, bird pest (flu)…	E	Biol., Chemic.,	Contaminated water (pathogens, chemicals)	1	9.) Coniferous and mixed forest in the catchment area	• Professional management of pesticides • Professional management of plant nutrients • Mobile fuel tanks • Harvesting of forest • Storage of timber	Data from the land registry on urbanized areas	Zeus ⇒ Fastighetskartan ⇒ Urbanized Areas ⇒ ba-riks-layer
Infiltration of GW by alien water (e.g.: salt water intrusion, leaching of contaminated surface water... )	2.1.12	Wetlands & flood plains not hydraulically separated from the aquifer	D, E	Biol., Chemic.,	Contaminated water (pathogens, chemicals). Nutrient load in water	1	­	­	Data from the land registry on urbanized areas	Zeus ⇒ Fastighetskartan ⇒ Urbanized Areas ⇒ ms-south-layer
Shortage of groundwater resouces	2.1.13	Groundwater aquifer is not sufficiently fed or water is abstracted by others	E	Unavailability	Unavailability of raw water	1	10.) Impermeabilizations in the urbanized area 11.) Less precipitation 12.) Household wells (68 household wells in the catchment area)	10., 11) No/less GW-renewal 12.) Overuse of household wells (extensive abstraction)	10.) Data from the land registry on urbanized areas 11.) Longterm precipitation forecast from Swedish Meterological and Hydrological Institute 12.) Data on household wells from the Swedish Geological Survey	10.) Zeus ⇒ Fastighetskartan ⇒ Urbanized Areas ⇒ ey_riks-layer 11.) Longterm precipitation forecast (SMHI) 12.) SGU ⇒ well data ⇒ household wells
Reduced biological activity in the treatment	2.1.14	Water temperature under 4°C	E	Biol., Chemic., Rad/phys.	Reduced biological activity in the treatment	1	5.) 33 Heat pumps	• Thermal pollution: slow down the growth or even cause death of certain kinds of plants and microbes. In frigid zones, the increase of underground temperature might also cause subsidence and release of N2O and CH4 [Ke Zhu]	Data on energy wells from the Swedish Geological Survey	SGU ⇒ well data ⇒ energy wells
Contamination of aquifers	2.1.15	Radioactivity fall-out	E	Rad/phys.	Contaminated water	1	possible	possible
Contamination of aquifers	2.1.16	Terrorist and vandalism actions	E	Biol., Chemic., Rad/phys., Unavailability	Contaminated water (pathogens, chemicals, radionucleids). Insufficient raw water.	1	possible	possible
Ingress of shallow water	5.1.1	Trees, roots, cracks in concrete (e.g. in chamber walls) or collection gallery.	D, O, E	Biol., Chemic.,	Contaminated water (pathogens, chemicals). Damages to infrastructure.	1	possible	possible
Contamination of groundwater	5.1.2	Infiltration of run-off water	D, E	Biol., Chemic., Unavailability	Contaminated water (pathogens, chemicals)	1	possible	possible
Contamination through openings (e.g. well-head, ventilation pipe, grit chamber, stilling basin, overflow pipe, doors...)	5.1.3	Contamination by flooding, sabotage, animals, etc.	D, O, E	Biol., Chemic., Rad/phys., Safety	Contaminated water (pathogens, chemicals)	1	possible	possible
Security failure, causing contamination	5.1.4	Improper locking of the system, sabotage, etc.	D, O, E	Biol., Chemic., Rad/phys., Unavailability, Safety	Contaminated water (pathogens, chemicals)	1	possible	possible
Soil setting and hydraulic bypass	5.1.5	Improper or missing bentonite layers.	D	Biol., Chemic., Rad/phys.	Contaminated water (pathogens, chemicals)	1	possible	possible
Soil setting, flooding, chamber buoyancy, corrosive soil materials	5.1.6	Improper maintenance concept, flood alarm and sump pump lacking	D, O	Biol., Chemic., Rad/phys.	Contaminated water (pathogens, chemicals)	1	possible	possible
Clogging of wells and pumps	5.1.7	Chemical composition of the aquifer water	E	Unavailability	Unsuitable composition of raw water	0	­	­
Power failure	5.2.1	Power interruption and no backup power supply	D, O, E	Unavailability	Insufficient raw water	0	­	­
Pipe burst	5.2.2	Bad condition of mains or external causes (e.g. landslides, heavy traffic)	D, O, E	Unavailability, Safety, External damage	Insufficient raw water	0	­	­
