# Supplementary material for: Integrating Ecosystem Services into Risk Assessments for Drinking Water Protection
Source: MDPI journal article supplement (doi:10.3390/w14081180), 2022-04-07
Supplement: s1 [file s1 › Table S6.xlsx]

## Sheet: Risk_Assessment_for_Skallsjoe
																				Description of likelihood, vulnerability and consequence severity and their respective scores:
						Provisional Services					Regulating Services			Cultural Services								Variable	Score	Description			Variable	Score	Description			Variable	Score	Description
						Municipal drinking water supply	Household wells	Water for grazing horses	Irrigation of garden	Heat pumps	Prevention of subsidence	Quality control of freshwater	Springs regulating temperature and humidity	Hiking in the area around the spring	Looking at springs	Option value					Likelihood (l)	Most unlikely	1	Very uncommon event – probably will never occur		Vulnerability (v)	Insignificant	1	Water source is barely vulnerable to a hazardous event		Consequence severity (c)	No consequences	0	WSS will in no manner be affected if the hazardous event occurs
Hazards	Specific threats from hazard			Likelihood	Vulnerability	Assessment of consequence severity for all identified WSS																Unlikely	2	The event may not occur			Low	2	The water source has a very good ability to withstand the effects of the hazardous event			Insignificant	1	Insignificant potential to cause harm to WSS
Tire and car company	 Spill of petroleum products, oil		Description	Unlikely	No protective soil layer; slow contaminant degradation	Long-term contamination, major impact	Long-term contamination, major impact	Long-term contamination, major impact	Long-term contamination, major impact	No consequence if quality degradation occurs	No consequence if quality degradation occurs	Contaminant will reach river but in small volume	No consequence if quality degradation occurs	Small effect if contaminant produces unpleasant odour	small effect if contaminant produces unpleasant colour	Long-term contamination , major impact	Total risk posed by a hazard to all services					Foreseeable	3	The event could occur			Moderate	3	The water source has a good ability to withstand the effects of the hazardous event			Minor	2	Potential to cause minor discomfort to WSS
	 Runoff from vehicle wash with degreaser		Score	2	4	4	4	4	4	0	0	2	0	2	2	4						Likely	4	The event has happened before and can probably occur again			High	4	The water source has very little ability to withstand the effects of the hazardous event			Moderate	3	Potential to cause a moderate impact on WSS (no long-term consequences)
			Risk posed by a hazard towards a WSS Risk = l  v c			32	32	32	32	0	0	16	0	16	16	32	208					Almost certain	5	A very common event, occurs regularly			Extreme	5	The water source cannot withstand the effects of the hazardous event			Major	4	Potential to cause a major negative impact on WSS (incl. long-term consequences)
Car service	 Spill of petroleum products, oil		Description	Unlikely	No protective soil layer; slow contaminant degradation	Long-term contamination , major impact	Long-term contamination , major impact	Long-term contamination , major impact	Long-term contamination , major impact	No consequence if quality degradation occurs	No consequence if quality degradation occurs	Only small load of contaminant will reach river	No consequence if quality degradation occurs	Small effect if contaminant produces unpleasant odour	Small effect if contaminant produces unpleasant colour	Long-term contamination , major impact	Total risk posed by a hazard to all services															Catastrophic	5	Potential to cause a catastrophic negative impact on WSS (incl. long-term consequences)
	 Runoff from vehicle wash with degreaser		Score	2	4	4	4	4	4	0	0	2	0	2	2	4
			Risk posed by a hazard towards a WSS Risk = l  v c			32	32	32	32	0	0	16	0	16	16	32	208
Sewage network	 Microbial contamination		Description	Likely	No protective soil layer; contaminant degradation possible	Short term contamination	Short term contamination	Short term contamination	Short term contamination	No consequence if quality degradation occurs	No consequence if quality degradation occurs	When load reaches river, contaminant will be nearly degraded	No consequence if quality degradation occurs	Small effect if contaminant produces unpleasant odour	Small effect if contaminant produces unpleasant colour	Short term contamination, future use barely affected	Total risk posed by a hazard to all services
			Score	4	4	3	3	3	3	0	0	1	0	2	2	1
			Risk posed by a hazard towards a WSS Risk = l  v c			48	48	48	48	0	0	16	0	32	32	16	288
Road E20	 Spill of petroleum products, oil		Description	Unlikely	No protective soil layer; slow contaminant degradation	Long-term contamination	Long-term contamination	Long-term contamination	Long-term contamination	No consequence if quality degradation occurs	No consequence if quality degradation occurs	Only small load of contaminant will reach river	No consequence if quality degradation occurs	Small effect if contaminant produces unpleasant odour	Small effect if contaminant produces unpleasant colour	Long-term contamination	Total risk posed by a hazard to all services
	 Accident with hazardous goods		Score	2	4	5	5	5	5	0	0	2	0	2	2	5
	 Road salt (chloride input)		Risk posed by a hazard towards a WSS Risk = l  v c			40	40	40	40	0	0	16	0	16	16	40	248
Heat pumps	 Contamination with antifreeze from heat pump construction/ operation		Description	Foreseeable	No protective soil layer; slow contaminant degradation	Long-term contamination	Long-term contamination	Long-term contamination	Long-term contamination	Decrease in efficiency if groundwater temperature increases	No consequence if quality degradation occurs	Only small load of contaminant will reach river	Decrease in cooling efficiency if groundwater temperature increases	Small effect if contaminant produces unpleasant odour	Small effect if contaminant produces unpleasant colour	Long-term contamination	Total risk posed by a hazard to all services
	Thermal pollution		Score	3	4	4	4	4	4	3	0	2	3	2	2	4
			Risk posed by a hazard towards a WSS Risk = l  v c			48	48	48	48	36	0	24	36	24	24	48	384
Cultivated land	 Microbial contamination from manure spread  Spread of pesticides		Description	Unlikely	No protective soil layer; slow contaminant degradation	Long-term contamination	Long-term contamination	Long-term contamination	Long-term contamination	No consequence if quality degradation occurs	No consequence if quality degradation occurs	Only small load of contaminant will reach river	No consequence if quality degradation occurs	Small effect if contaminant produces unpleasant odour	Small effect if contaminant produces unpleasant colour	Long-term contamination	Total risk posed by a hazard to all services
	 Spread of pesticides		Score	2	4	4	4	4	4	0	0	2	0	2	2	4
	 Nutrient load (N, P)		Risk posed by a hazard towards a WSS Risk = l  v c			32	32	32	32	0	0	16	0	16	16	32	208
Football field	 Spread of pesticides		Description	Most unlikely	No protective soil layer; slow contaminant degradation	Moderate impact service due to small quantities of pesticides handeled	Moderate impact service due to small quantities of pesticides handeled	Moderate impact service due to small quantities of pesticides handeled	Moderate impact service due to small quantities of pesticides handeled	No consequence if quality degradation occurs	No consequence if quality degradation occurs	Only small load of contaminant will reach river	No consequence if quality degradation occurs	Small effect if contaminant produces unpleasant odour	Small effect if contaminant produces unpleasant colour	Moderate impact service due to small quantities of pesticides handeled	Total risk posed by a hazard to all services
			Score	1	4	3	3	3	3	0	0	2	0	2	2	3
			Risk posed by a hazard towards a WSS Risk = l  v c			12	12	12	12	0	0	8	0	8	8	12	84
Motocross tracks	 Spill of petroleum products, oil		Description	Unlikely	No protective soil layer; slow contaminant degradation	Moderate impact on service due to small quantities of petroleum being handeled	Moderate impact on service due to small quantities of petroleum being handeled	Moderate impact on service due to small quantities of petroleum being handeled	Moderate impact on service due to small quantities of petroleum being handeled	No consequence if quality degradation occurs	No consequence if quality degradation occurs	Only small load of contaminant will reach river	No consequence if quality degradation occurs	Small effect if contaminant produces unpleasant odour	Small effect if contaminant produces unpleasant colour	Moderate impact on service due to small quantities of petroleum being handeled	Total risk posed by a hazard to all services
			Score	2	4	3	3	3	3	0	0	2	0	2	2	3
			Risk posed by a hazard towards a WSS Risk = l  v c			24	24	24	24	0	0	16	0	16	16	24	168
Forest activities	 Spread of pesticides		Description	Unlikely	No protective soil layer; slow contaminant degradation	Long-term contamination	Long-term contamination	Long-term contamination	Long-term contamination	No consequence if quality degradation occurs	No consequence if quality degradation occurs	Only small load of contaminant will reach river	No consequence if quality degradation occurs	Small effect if contaminant produces unpleasant odour	Small effect if contaminant produces unpleasant colour	Long-term contamination	Total risk posed by a hazard to all services
	 Spread of plant nutrients		Score	2	4	4	4	4	4	0	0	2	0	2	2	5
	 Spill of petroleum from mobile fuel tanks		Risk posed by a hazard towards a WSS Risk = l  v c			32	32	32	32	0	0	16	0	16	16	40	216
Impermeabilization	 Less groundwater renewal		Description	Likely	Water source only recharged by precipitation but impermeabilization constitutes a small part of the recharge area	Major long-term effect on quantity	Major long-term effect on quantity	Major long-term effect on quantity	Major long-term effect on quantity	Major long-term effect on quantity	Major long-term effect on quantity	Only small amount of water is discharged into the river, insignificant impact	Potential for disappearance of springs	Potential for disappearance of springs	Potential for disappearance of springs	Major long-term effect on quantity	Total risk posed by a hazard to all services
			Score	4	3	4	4	4	4	4	4	1	5	5	5	4
			Risk posed by a hazard towards a WSS Risk = l  v c			48	48	48	48	48	48	12	60	60	60	48	528
Less precipitation	 Less groundwater renewal		Description	Unlikely	Water source only recharged by precipitation	Major long-term effect on quantity	Major long-term effect on quantity	Major long-term effect on quantity	Major long-term effect on quantity	Major long-term effect on quantity	Major long-term effect on quantity	Only small amount of water is discharged into the river, insignificant impact	Potential for disappearance of springs	Potential for disappearance of springs	Potential for disappearance of springs	Major long-term effect on quantity	Total risk posed by a hazard to all services
			Score	2	5	4	4	4	4	4	4	1	5	5	5	4
			Risk posed by a hazard towards a WSS Risk = l  v c			40	40	40	40	40	40	10	50	50	50	40	440
Overexploitation	 Overexploitation of household wells, shortage of groundwater		Description	Unlikely	Water source only recharged by precipitation; no ability to withstand overabstraction	Moderate impact on service supply (no long-term effect if hazard source is mitigated)	Moderate impact on service supply (no long-term effect if hazard source is mitigated)	Moderate impact on service supply (no long-term effect if hazard source is mitigated)	Moderate impact on service supply (no long-term effect if hazard source is mitigated)	Moderate impact on service supply (no long-term effect if hazard source is mitigated)	Major impact	Only small amount of water is discharged into the river, insignificant impact	Moderate impact on service supply (no long-term effect if hazard source is mitigated)	Moderate impact on service supply (no long-effect if hazard source is mitigated)	Moderate impact on service supply (no long-term effect if hazard source is mitigated)	Short term disturbance, future use barely affected	Total risk posed by a hazard to all services
			Score	2	4	3	3	3	3	3	4	1	3	3	3	1
			Risk posed by a hazard towards a WSS Risk = l  v c			24	24	24	24	24	32	8	24	24	24	8	240
					Total risk a WSS is exposed to	376	376	376	376	148	120	150	170	270	270	336

## Sheet: Effect_on_WSS
	Provisional Services					Regulating Services			Cultural Services
Hazard sources	Municipal DW supply	Household wells	Water for grazing horses	Irrigation of garden with well	Heat pumps	Prevention of subsidence	Quality control of freshwater	Springs regulating local temperature and humidity	Hiking in the green area around the spring	Looking at the springs	Option value	Sum	Contribution to overall risk
Tire and car company	32	32	32	32	0	0	16	0	16	16	32	208	0.0645963
Car service	32	32	32	32	0	0	16	0	16	16	32	208	0.0645963
Sewage network	48	48	48	48	0	0	16	0	32	32	16	288	0.089441
Road E20	40	40	40	40	0	0	16	0	16	16	40	248	0.0770186
Heat pumps	48	48	48	48	36	0	24	36	24	24	48	384	0.119255
Cultivated land	32	32	32	32	0	0	16	0	16	16	32	208	0.0645963
Football field	12	12	12	12	0	0	8	0	8	8	12	84	0.026087
Motocross tracks	24	24	24	24	0	0	16	0	16	16	24	168	0.0521739
Forest activities	32	32	32	32	0	0	16	0	16	16	40	216	0.0670807
Impermeabilizations	48	48	48	48	48	48	12	60	60	60	48	528	0.163975
Less precipitation	40	40	40	40	40	40	10	50	50	50	40	440	0.136646
Overexploitation	24	24	24	24	24	32	8	24	24	24	8	240	0.0745342
Total risk a WSS is exposed to	412	412	412	412	148	120	174	170	294	294	372	3220	1
			No risk:	0	Low risk:	1 - 40	Medium to high risk:	41 - 100	Extremely high risk:	> 100
